1 **Effects of two centuries of global environmental variation on phenology and physiology of**  
2 ***Arabidopsis thaliana***

3 200 years of *A. thaliana* phenotypic variation

4

5 Victoria L. DeLeo<sup>1</sup>, Duncan N. L. Menge<sup>2</sup>, Ephraim M. Hanks<sup>3</sup>, Thomas E. Juenger<sup>4</sup>, Jesse R.  
6 Lasky<sup>5,6,7</sup>

7

8 <sup>1</sup>Intercollege Graduate Degree Program in Plant Biology

9 Pennsylvania State University

10 University Park, PA 16802

11

12 <sup>2</sup>Department of Ecology, Evolution, and Environmental Biology

13 Columbia University

14 New York, NY 10027

15 dm2972@columbia.edu

16

17 <sup>3</sup>Department of Statistics

18 Pennsylvania State University

19 University Park, PA 16802

20 hanks@psu.edu

21

22 <sup>4</sup>Department of Integrative Biology

23 University of Texas at Austin

24 Austin, TX 78712

25 tjuenger@austin.utexas.edu

26

27 <sup>5</sup>Department of Biology

28 Pennsylvania State University

29 University Park, PA 16802

30 lasky@psu.edu

31

32 Past affiliations:

33 <sup>6</sup>Department of Ecology, Evolution, and Environmental Biology

34 Columbia University

35 New York, NY 10027

36

37 <sup>7</sup>Earth Institute

38 Columbia University

39 New York, NY 10025

40

41 Corresponding information:

42 Victoria DeLeo

43 814-863-8854

44 vldeleo@psu.edu

45 **Abstract**

46 Intraspecific trait variation is caused by genetic and plastic responses to environment. This  
47 intraspecific diversity is captured in immense natural history collections, giving us a window into  
48 trait variation across continents and through centuries of environmental shifts. Here we tested if  
49 hypotheses based on life history and the leaf economics spectrum explain intraspecific trait  
50 changes across global spatiotemporal environmental gradients. We measured phenotypes on a  
51 216-year time series of *Arabidopsis thaliana* accessions from across the native range and applied  
52 spatially varying coefficient models to quantify region-specific trends in trait coordination and  
53 trait responses to climate gradients. All traits exhibited significant change across space and/or  
54 through time. For example,  $\delta^{15}\text{N}$  decreased over time across much of the range and leaf C:N  
55 increased, consistent with predictions based on anthropogenic changes in land use and  
56 atmosphere. Plants were collected later in the growing season in more recent years in many  
57 regions, possibly because populations shifted toward more spring germination and summer  
58 flowering as opposed to fall germination and spring flowering. When climate variables were  
59 considered, collection dates were earlier in warmer years, while summer rainfall had opposing  
60 associations with collection date depending on regions. There was only a modest correlation  
61 among traits, indicating a lack of a single life history/physiology axis. Nevertheless, leaf C:N  
62 was low for summer- versus spring-collected plants, consistent with a life history-physiology  
63 axis from slow-growing winter annuals to fast-growing spring/summer annuals. Regional  
64 heterogeneity in phenotype trends indicates complex responses to spatiotemporal environmental  
65 gradients potentially due to geographic genetic variation and climate interactions with other  
66 aspects of environment. Our study demonstrates how natural history collections can be used to

67 broadly characterize trait responses to environment, revealing heterogeneity in response to  
68 anthropogenic change.

69 **Keywords:** Generalized Additive Model, abiotic stress, climate change,  $\Delta^{13}\text{C}$ , phenology

## 70 **Introduction**

71 An organism's fitness is determined by the interaction between its traits and its environment.  
72 Organisms respond to environmental gradients in diverse ways, including genetic and plastic  
73 shifts in life history, phenology, and physiology (Burghardt, Metcalf, Wilczek, Schmitt, &  
74 Donohue, 2015; Reich, 2014; Wright et al., 2004). Spatial and temporal environmental gradients  
75 can promote phenotypic plasticity or generate varying selection across which populations adapt  
76 to local conditions (Bradshaw, 1965; Henn et al., 2018; Joshi et al., 2001; Leimu & Fischer,  
77 2008; Linhart & Grant, 2002; Matesanz, Gianoli, & Valladares, 2010; Turesson, 1922). By  
78 studying how phenology and physiology change across environments through space and time we  
79 can learn about mechanisms of adaptive environmental response and biological constraints.

80 Anthropogenic global change has led to dramatic phenotypic changes in many organisms. For  
81 example, many species are shifting their ranges poleward and temperate spring phenology is  
82 advancing (Parmesan & Yohe, 2003). However, anthropogenic global change is multi-faceted,  
83 involving climate, nitrogen deposition, atmospheric CO<sub>2</sub>, and land use. Our understanding of the  
84 specific environmental drivers of phenotypic change has been hampered both by insufficient  
85 long-term datasets and by the complexities of interacting and correlated environmental variables.  
86 Furthermore, many populations and species do not exhibit the stereotypic advancing temperate  
87 phenology and poleward range shifts (Both et al., 2004; CaraDonna, Iler, & Inouye, 2014; Park  
88 et al., 2018). These diverse responses can be caused by geographic variation in the rate of  
89 environmental change or by intraspecific genetic variation, clouding our understanding of  
90 anthropogenic impacts. To address these challenges, we collected physiology and phenology  
91 data for *Arabidopsis thaliana* (hereafter, *Arabidopsis*) specimens over the last 200 years and  
92 across its native range, and we tested relationships between climate and traits using spatial

93 generalized additive models (GAMs) to account for geographic structure in environmental  
94 response.

95 *Arabidopsis* is a powerful system for studying phenotypic change across space and climate  
96 gradients. Past studies have found that *Arabidopsis* populations exhibit genetic differences  
97 among populations likely due to isolation by distance (Alonso-Blanco et al., 2016; Horton et al.,  
98 2012; Ostrowski et al., 2006; Platt et al., 2010) and local adaptation (Fournier-Level et al. 2011,  
99 Hancock et al. 2011, Lasky et al. 2012) . Genetic differences in flowering time among  
100 populations may be due to local adaptation (Atwell et al., 2010; Burghardt et al., 2015; Tabas-  
101 Madrid et al., 2018), with northern genotypes having later flowering times (Atwell et al., 2010;  
102 Stinchcombe et al., 2004). *Arabidopsis* physiology also shows evidence of a role in local  
103 adaptation. Genotypes from regions of greater precipitation have faster growth and lower leaf  
104 vein density, and genotypes from colder temperatures have increased leaf thickness and wider  
105 leaf minor vein cross section (Adams, Stewart, Cohu, Muller, & Demmig-Adams, 2016; Sack et  
106 al., 2012; Sartori et al., 2018). These findings provide a lens through which to interpret  
107 phenotypic variation among plants in nature. In turn, museum collections offer broadly  
108 distributed sampling in space and time to test the relationships between phenotypes and  
109 environment in nature (Lang, Willems, Scheepens, Burbano, & Bossdorf, 2018; Willis et al.,  
110 2017).

111 Multiple frameworks of plant life history and physiology variation correspond to a continuum of  
112 fast to slow life histories (e.g. Grime, 1977; Westoby, 1998; I. J. Wright et al., 2004). Individuals  
113 that use a fast strategy are characterized by fast relative growth, early reproduction, and intensive  
114 use of nutrients or water, while individuals with a slow strategy are characterized by slow  
115 growth, late reproduction, and more measured use of nutrients and water. The Leaf Economics

116 Spectrum (LES) hypothesizes that leaves vary along single life history-physiology axis from fast  
117 to slow in association with large-scale climate gradients (Reich, 2014; Reich et al., 2003; Wright  
118 et al., 2004). The LES predicts that lower nitrogen concentration leaves (high C:N, low  
119 proportion N) are found in drier and in hotter areas, possibly in part because of investment in  
120 non-photosynthetic leaf features, e.g. veins (Blonder, Violle, Bentley, & Enquist, 2011; Easlon et  
121 al., 2014; Sack et al., 2012) (see Table 1 for phenotype/environment hypotheses and how they  
122 relate to the fast/slow framework). Low N leaves are thicker (high mass to area) and provide  
123 protection against stress (drought) at the expense of a N investment in photosynthesis, resulting  
124 in a slower life cycle (Evans, 1989; Stocking & Ongun, 1962). Although community-wide  
125 turnover in mean traits across natural environments often follows LES predictions, *within* species  
126 trait variation often defies LES predictions (Anderegg et al., 2018; Hu et al., 2015; J. P. Wright  
127 & Sutton-Grier, 2012). Nevertheless, *Arabidopsis* exhibits genetic variation in traits that  
128 corresponds to LES predictions (Easlon et al., 2014; Sartori et al., 2018; Vasseur, Violle,  
129 Enquist, Granier, & Vile, 2012); individuals with rapid life histories have physiological traits tied  
130 to fast growth and resource acquisition (e.g. high stomatal conductance, high leaf area relative  
131 mass (Specific Leaf Area, or SLA)) (Lovell et al., 2013; McKay, Richards, & Mitchell-Olds,  
132 2003; Sartori et al., 2018; Wolfe & Tonsor, 2014).

133 Isotopic signatures provide clues to organismal life histories. In plants,  $\Delta^{13}\text{C}$  measures  
134 discrimination against  $^{13}\text{C}$  in photosynthesis and is an indicator of  $\text{pCO}_2$  within leaves ( $C_i$ )  
135 relative to atmospheric  $\text{pCO}_2$  ( $C_a$ ) (Farquhar, O'Leary, & Berry, 1982).  $C_i$  declines when stomata  
136 are closed, which may be a conservative life history response to soil drying, while  $C_a$  declines  
137 with elevation. Thus, we expect  $\Delta^{13}\text{C}$  to increase in moist growing environments and decrease  
138 with elevation (Diefendorf, Mueller, Wing, Koch, & Freeman, 2010; Farquhar et al., 1982; Zhu,

139 Siegwolf, Durka, & Körner, 2010) (Table 1).  $\delta^{15}\text{N}$  (the ratio of  $^{15}\text{N}$  to  $^{14}\text{N}$ ) can be affected by  
140 nitrogen allocation and so might reflect variation in C:N (Stock & Evans, 2006). However,  
141 variation in leaf N and  $\delta^{15}\text{N}$  may also directly reflect changing environments (N deposition,  
142 biogeochemical cycling, e.g. Pardo *et al.* 2007) rather than plant traits, with both increasing with  
143 temperature and leaf N increasing and  $\delta^{15}\text{N}$  decreasing with rainfall (Table 1).

144 Fast/slow strategies also correspond to phenological variation, especially in annual plants. In  
145 seasonal environments, phenology is constrained by seasonality and simultaneously determines  
146 the environment encountered during vulnerable stages. *Arabidopsis* development can be highly  
147 sensitive to moisture, temperature, and photoperiod (Burghardt *et al.*, 2015; Wilczek *et al.*,  
148 2009). For example, although warmth can increase growth rates, many *Arabidopsis* genotypes  
149 require winter cold cues (known as vernalization) to transition to spring flowering. Fast life  
150 histories can allow spring or summer annual life cycles, where a plant germinates and flowers  
151 within a single season, while slow life histories and vernalization requirements result in a winter  
152 annual cycle, where a plant germinates in the fall and flowers the following spring. Rapid  
153 development and reproduction can allow *Arabidopsis* plants to escape drought (McKay *et al.*,  
154 2003), while slower flowering plants can exhibit drought avoidance strategies of minimizing  
155 water loss (e.g. through stomatal closure) or maximizing water uptake (Kenney, Mckay,  
156 Richards, & Juenger, 2014; Ludlow, 1989). Because herbarium specimens are typically  
157 reproductive, it is challenging to infer germination times based on collection dates. However,  
158 information on physiology and climate preceding collection may provide information on life  
159 history variation.

160 Standardized metrics facilitate the comparison of ecologically relevant phenological variation  
161 among sites that differ in climate and seasonal timing. Photothermal units (PTUs) integrate



162 developmental time under favorable temperatures and light and account for much of the  
163 environmental influence on flowering dates in *Arabidopsis* (Brachi et al., 2010; Wilczek et al.,  
164 2009). In essence, PTUs estimate how far along in a growing season an event occurs. Measures  
165 of developmental time standardized to environmental conditions can better capture genetic  
166 variation in development compared to raw flowering dates in *Arabidopsis*, the latter of which are  
167 strongly driven by environment (Brachi et al., 2010). Without knowing an exact germination  
168 date, it is impossible to perfectly approximate the climate experienced in the wild, yet even a  
169 rough estimate using an arbitrary date allows us to compare changes in the climate experienced  
170 at flowering. Variation in herbarium collection dates is a reliable proxy for variation in  
171 phenology of flowering date (Davis, Willis, Connolly, Kelly, & Ellison, 2015; MacGillivray,  
172 Hudson, & Lowe, 2010; Miller-Rushing, Primack, Primack, & Mukunda, 2006). In addition, low  
173 PTUs at collection hints at a winter annual growing pattern (because growth is occurring before  
174 PTU calculations begin), so we can use this measurement to search for regional variation in life  
175 history. Combined with existing knowledge the phenology of ecotypes from different sites, PTUs  
176 may help reveal phenological adaptation along spatial and temporal environmental gradients.

177 Here, we leverage the immense fieldwork underlying natural history collections to investigate  
178 how intraspecific diversity is structured through time and along spatiotemporal climate gradients.  
179 Specifically, we use thousands of *Arabidopsis* specimens that span over 200 years of sampling  
180 across *Arabidopsis*' range in Eurasia and Northern Africa. We quantify the spatial patterns of  
181 *Arabidopsis*' phenotypic variation along environmental gradients, which allows us to put  
182 temporal trends in context. We hypothesized that for natural *Arabidopsis* populations,  
183 phenotype-environment correlations would follow fast-slow predictions of LES and phenology

184 traits (Table 1). We combine these records with global gridded climate data to ask three  
185 questions about *Arabidopsis* in nature:

- 186 1. To what degree does intraspecific trait variation among wild individuals fall along a  
187 single coordinated life history-physiology axis?
- 188 2. Do life history and physiology vary across spatial environmental gradients in long-term  
189 average conditions, suggesting adaptive responses consistent with the LES?
- 190 3. Have life history and physiology changed over the last two centuries? In particular, have  
191 changes tracked climate fluctuations, suggesting adaptive responses consistent with the  
192 LES?

193

## 194 **Materials & Methods**

### 195 *Samples*

196 Our set of samples (N= 3443) included *Arabidopsis thaliana* herbarium and germplasm  
197 accessions with known collection dates between 1794 and 2010 from the native range of  
198 *Arabidopsis* in Europe, the Middle East, Central Asia, and North Africa (Hoffmann, 2002).  
199 Wild-collected germplasm accessions with known collection date and location (N = 447) were  
200 included only in models of phenology. Information on germplasm accessions came from the  
201 *Arabidopsis* Biological Resource Center (<https://abrc.osu.edu/>). For each herbarium specimen  
202 (N=2663) we visually verified species identification and reproductive status as simultaneously  
203 flowering and fruiting. Samples that were only fruited/senesced, only flowering, or had neither  
204 open flowers nor fruits were excluded to focus on a relatively uniform developmental stage (see  
205 Supplementary Table 1). This consistency is important for assessing C:N, since progression of  
206 plant development involves reallocation of nutrients, and for a meaningful characterization of  
207 phenology with collection date (Himmelblau & Amasino, 2001). Furthermore, too few samples  
208 (178/2663) were in other phenological stages to allow for a rigorous comparison. We excluded  
209 dozens of misidentified specimens, highlighting the importance of verification of information in  
210 natural history collections (cf. unverified data in some online databases). Samples with too low  
211 precision in collection date (less precise than a single month) were excluded from phenological  
212 analysis.

213

### 214 *Leaf traits*

215 To test LES hypotheses for response to environment, we measured  $\Delta^{13}\text{C}$ ,  $\delta^{15}\text{N}$ , and C:N from  
216 leaf tissue of herbarium samples. We removed and pulverized leaf samples (mean weight = 2.75  
217 mg) of a subset of our quality-checked herbarium specimens and sent them to the UC-Davis  
218 Stable Isotope Facility. In total, we obtained values for  $\delta^{15}\text{N}$ ,  $\delta^{13}\text{C}$ , C:N, and proportion N in 459  
219 accessions, although 5 samples failed for  $\delta^{13}\text{C}$  and 1 sample was missing failed for both C:N and  
220 proportion N values.

221 We measured leaf  $\delta^{13}\text{C}$  (isotope ratio), but atmospheric  $\delta^{13}\text{C}$  has changed dramatically over the  
222 time period of this study due to fossil fuel emissions. Thus we converted leaf isotope ratio ( $\delta^{13}\text{C}$ )  
223 to discrimination ( $\Delta^{13}\text{C}$ ) using an estimate of the atmospheric  $\delta^{13}\text{C}$  time series (McCarroll &  
224 Loader, 2004) from 1850 to 2000, continuing linear extrapolation beyond 2000, using the 1850  
225 value for earlier specimens, and the equation of Farquhar et al. (1989),  $\Delta = \frac{\delta_a - \delta_p}{1 + \delta_p}$ , where  $\delta_a$  is the  
226 isotope ratio in the atmosphere and  $\delta_p$  is the isotope ratio in plant tissue (ratios relative to a  
227 standard).

228

## 229 *Phenology*

230 To estimate accumulated photothermal units (PTU) at date of collection, we used the equation of  
231 Burghardt et al. (2015) to model the hourly temperature values for the accumulation of sunlight  
232 degree hours between January 1 and dusk on the date of collection at each accession's  
233 coordinate. Daylength was approximated with the R package geosphere (Hijmans, 2017).  
234 Monthly temperature values for the period 1900-2010 came from the Climate Research Unit time  
235 series dataset v4.01 (Harris, Jones, Osborn, & Lister, 2014). PTUs were only calculated for  
236 specimens collected after 1901 (N = 2488) due to the historical limit of the monthly temperature

237 data. Daily temperatures were interpolated from monthly temperatures using the function  
238 splinefun in R on the “periodic” setting. PTUs calculated from January 1<sup>st</sup> will not completely  
239 account for the climate experienced by plants that germinate in the fall. However, for the same  
240 developmental time (PTUs), determined by weather conditions, winter annuals are expected to  
241 flower earlier in a growing season compared to spring annuals. Comparing changes in PTU at  
242 collection to changes in date of collection might provide clues as to where climate is driving  
243 flowering time shifts and where flowering time is responding to pressures other than  
244 temperature.

245

#### 246 *Statistical analysis*

247 *Arabidopsis* displays substantial genetic diversity in environmental response between genotypes  
248 from different regions (e.g. Exposito-Alonso et al., 2018; Lasky, Forester, & Reimherr, 2018).  
249 Thus, we employed a regression model with spatially varying coefficients (generalized additive  
250 models, GAMs) to account for regional differences in responses to environment, much of which  
251 may have a genetic component (Wheeler & Waller, 2009; Wood, 2006). GAMs allow fitting of  
252 parameters that vary smoothly in space (i.e. parameter surfaces) and can thus capture spatially  
253 varying relationships between predictors and the response of interest, such as we see in  
254 ecological processes (Yee & Mackenzie, 2002; Yee & Mitchell, 2006). The spatially varying  
255 coefficients fit by GAM allow us to infer from the data where relationships between variables  
256 change, as opposed to binning data into a set of fixed (and possibly artificially defined) regions.  
257 In a standard linear statistical model, the effect of a covariate  $x$  (i.e., the effect of  $x$  = January  
258 Minimum Temperature) at site  $i$  is a linear function of the covariate:  $x_i * \beta$ . Note that differences  
259 across sites in  $x_i * \beta$  are completely controlled by differences in the covariate  $x$  at different sites.

260 In the spatially-varying GAMs we consider in this study, we allow the effect of covariates to  
261 vary across space, with the effect of a covariate  $x$  at location  $i$  being  $x_i * \beta_i$  where  $\beta_i$  is the linear  
262 effect of  $x$  at the  $i^{\text{th}}$  spatial location. That is, we model allow the effect of the covariate  $x$  to vary  
263 across space. Thus, the effect of (for example) January Minimum Temperature might be different  
264 in Europe than it would be in Southeast Asia.

265 It would be impossible to uniquely identify a completely different effect  $\beta_i$  at every location, as  
266 we only have one replicate at each site, and there would be no replication. Spatially-varying  
267 GAMs address this identifiability by smoothing  $\beta_i$  across space and requiring that effects  $\beta_i$  and  
268  $\beta_j$  for sites  $i$  and  $j$  that are close in space be very similar to each other. The degree of spatial  
269 smoothness in the GAM is chosen by cross-validation to ensure that the GAM does not overfit  
270 the data. Thus, spatially-varying coefficient models provide an approach for modeling variability  
271 in the effect of covariates across space, with the effect constrained to vary slowly across space to  
272 ensure identifiability and combat overfitting.

273 Each cell in our 140x200 grid model rasters corresponded to 53.1 km East/West at the lowest  
274 latitude (28.16°, versus 20.3 km at 68.18° N) and 31.8 km North/South (calculated using  
275 Vincenty ellipsoid distances in the geosphere package). Smaller grid cells allow for more finely  
276 smoothed slope values. Model predictions farther than 200km from a sampled accession were  
277 discarded when visualizing results.

278 We selected climate variables based on knowledge of critical *Arabidopsis* developmental times  
279 and likely environmental stressors: average temperature in April, when warmth is expected to  
280 accelerate development (AprilMean in the models), minimum temperature in January, when  
281 vernalization cues are likely accumulating or when Mediterranean plants are in early growth  
282 (JanMinimum), and July aridity index (AI), when summer drought may be most likely (Fournier-

283 Level et al., 2013; Hoffmann, 2002; Lasky et al., 2012; Wilczek, Cooper, Korves, & Schmitt,  
284 2014). Our analyses should not be highly sensitive to the exact calendar month chosen, given the  
285 high correlation in conditions between consecutive months (e.g. warm Aprils tend to be followed  
286 by warm Mays). Aridity index was calculated from July precipitation divided by July potential  
287 evapotranspiration (PET) (United Nations Environment Program, 1997). These climate gradients  
288 were generally not strongly correlated (July Aridity to April Mean Temperature  $r = -0.33$ ; July  
289 Aridity to January Minimum Temperature  $r = -0.12$ ; January Minimum Temperature to April  
290 Mean Temperature  $r = 0.71$  by Pearson's product-moment correlation). We took temperature,  
291 precipitation, and PET values from the Climate Research Unit time series dataset, using values  
292 for the year of collection (New, Hulme, & Jones, 2000).

293

294 First, to study trait correlations that might indicate a fast-slow life history (Question 1), we  
295 performed a Principal Components Analysis of flowering time,  $\Delta^{13}\text{C}$ ,  $\delta^{15}\text{N}$ , and C:N ratio and  
296 tested pairwise associations between traits. We considered how traits co-vary by calculating the  
297 Pearson's correlation coefficients between traits and by Principal Components Analysis. We also  
298 fit GAMs (described in detail below) with spatially varying intercepts allowing measured  
299 phenotypes as both response and predictor variables to observe how the correspondence of traits  
300 changes through space.

301

302 Second, to study phenotypic responses to spatial gradients in long-term average climates  
303 (Question 2), we fit models with spatially varying coefficients for long-term, 50-year climate  
304 averages at each location ("spatial climate models", Equation 1). We scaled these climate

305 covariates and year of collection to unit standard deviation (Hijmans, Cameron, Parra, Jones, &  
306 Jarvis, 2005). In these models of responses to long-term average conditions, year of collection  
307 can be considered a nuisance variable, accounting for temporal variation at a location that may  
308 be important but is not the focus of this specific model. In spatial climate models, we used a  
309 single global intercept. Spatial climate models included specimens from all years with phenotype  
310 data.

311

$$312 \quad \text{Phenotype}_{ij} = \beta_1 \text{year}_j + \beta_2 \text{AI}_j + \beta_3 \text{JanMinimum}_j + \beta_4 \text{AprilMean}_j + \mu + \text{error}_{ij} \quad (\text{eqn 1})$$

313

314 In all models, the subscript  $j$  denotes location and  $i$  denotes year of collection. For the temporal  
315 climate anomaly model, the spatially varying intercept is denoted by  $\mu_j$ , where the “ $j$ ” subscript  
316 indicates that the intercept varies with location. The errors are assumed to be independent, be  
317 normally distributed, and have constant variance.

318

319 Next, to assess how phenotypes have changed across the last two centuries (Question 3), we  
320 tested a model with spatially-varying coefficients for the effect of year, allowing for geographic  
321 variation in temporal trends (hereafter, “year models”). The model also included spatially  
322 varying intercepts to account for regional differences in long-term mean phenotypes. Year  
323 models included all specimens with data for a particular phenotype.

324 Finally, to assess how temporal fluctuations in climate drive phenotypic change (Question 3), we  
325 fit models with the three climate covariates for the year of collection (Equation 2). We converted



326 climate covariates to local anomalies by standardizing them relative to the entire time-series for a  
327 given grid cell to unit standard deviation and mean zero (“temporal climate anomaly models”).  
328 In standardizing climate fluctuations to the climate record of a location, we assume that the effect  
329 of an anomaly on the response variable is best captured by the relative strength (and direction) of  
330 an anomaly (relative to an average anomaly) rather than how extreme an anomaly is in general.  
331 The model also included spatially varying intercepts to account for regional differences in long-  
332 term mean phenotypes. Temporal climate models only included specimens from after 1900,  
333 when we had data on monthly climate from CRU. These models had the following structure

334

$$335 \quad \text{Phenotype}_{ij} = \beta_1 \text{year}_{\text{dev}, ij} + \beta_2 \text{AI}_{\text{dev}, ij} + \beta_3 \text{JanMinimum}_{\text{dev}, ij} + \beta_4 \text{AprilMean}_{\text{dev}, ij} + \mu_j + \text{error}_{ij}$$

336 (eqn 2)

337

338 Models were fit in R (version 3.5.0, R Core Team 2011) using the ‘gam’ function in package  
339 mgcv (version 1.8-17, Wood 2011). We allowed the model fitting to penalize covariates to 0 so  
340 that covariates weakly associated with phenotypes could be completely removed from the model;  
341 thus, using the mgcv package we can achieve model selection through joint penalization of  
342 multiple model terms. Coefficients in spatially varying coefficient models represent the  
343 relationship between each term and phenotype at each geographic point (indexed by  $j$  in our  
344 models).

345 We considered two other spatially-varying environmental variables of interest: elevation and N  
346 deposition. We left elevation and nitrogen deposition covariates out of the final models because

347 inclusion resulted in instability in the numerical routines the GAM software (mgcv) used to  
348 estimate parameters and approximate Hessian matrices needed for confidence intervals. See  
349 supplemental material for more information on these covariates. Including only the variables of  
350 the three climate covariates and year resulted in numerically stable estimates. In addition, scaling  
351 of year and climate variables tended to reduce the concavity of variables and increase stability.

352

353 Code for all the models and plots will be included as a supplement and will be available on  
354 github.

355

356 **Results**

357 *Distribution of samples through time and space*

358 Samples were broadly distributed, with dense collections in Norway/Sweden, the Netherlands,  
359 and Spain (reflecting major herbaria used in the study), and sparser collections to the east (Figure  
360 1). The subset of samples with tissue analysis spanned the extent of the geographic distribution  
361 of all samples. Tissue sampling was most dense in Norway, Spain, and the UK and sparser  
362 elsewhere in the range. The earliest collection date we used was 1794, but a greater number of  
363 samples were available from the 1900s onwards.



370 *Correlations among phenotypes (question 1)*

371 We found generally weak correlations among phenotypes of *Arabidopsis* individuals (Question  
372 1). The first two principal components explained only 36.2% and 24.1%, respectively, of the  
373 variance in the five phenotypes of  $\Delta^{13}\text{C}$ ,  $\delta^{15}\text{N}$ , date of collection, C:N, and PTU (N = 397). The  
374 first principal component corresponded to a negative correlation between C:N versus day of  
375 collection (bivariate  $r = -0.189$ ) and PTU (bivariate  $r = -0.101$ ). Inspecting the relationship  
376 between collection date and C:N further revealed a triangle shape (Figure 2B). That is, there  
377 were no late-collected individuals with high C:N, potentially indicating that the late-collected  
378 plants that we hypothesize are spring/summer annuals also exhibit fast growth strategies. Plants  
379 with the lowest C:N have a less negative relationship to day of collection than plants with a  
380 higher C:N, and ANOVA showed there to be a significant difference between the slopes of the  
381 regression of the 25<sup>th</sup> and 75<sup>th</sup> percentiles of C:N ( $p = 0.0002$ , Figure S2) (Koenker & Koenker,  
382 2011). When allowing the relationship between C:N and phenology to vary spatially (GAM with  
383 spatially varying coefficients), we found both date of collection and PTU were negatively  
384 correlated with C:N across the *Arabidopsis* native range, but this correlation was not  
385 significantly different from 0 (the 95% confidence interval included 0) (Figure S3). The second  
386 PC corresponded to a negative correlation between  $\Delta^{13}\text{C}$  and  $\delta^{15}\text{N}$  (bivariate  $r = -0.218$ ). C:N and  
387 leaf proportion N are highly correlated (bivariate  $r = -0.816$ , Figure S1), so we focus on C:N. See  
388 supplementary material for leaf N results (Figure S16 and S17).

389

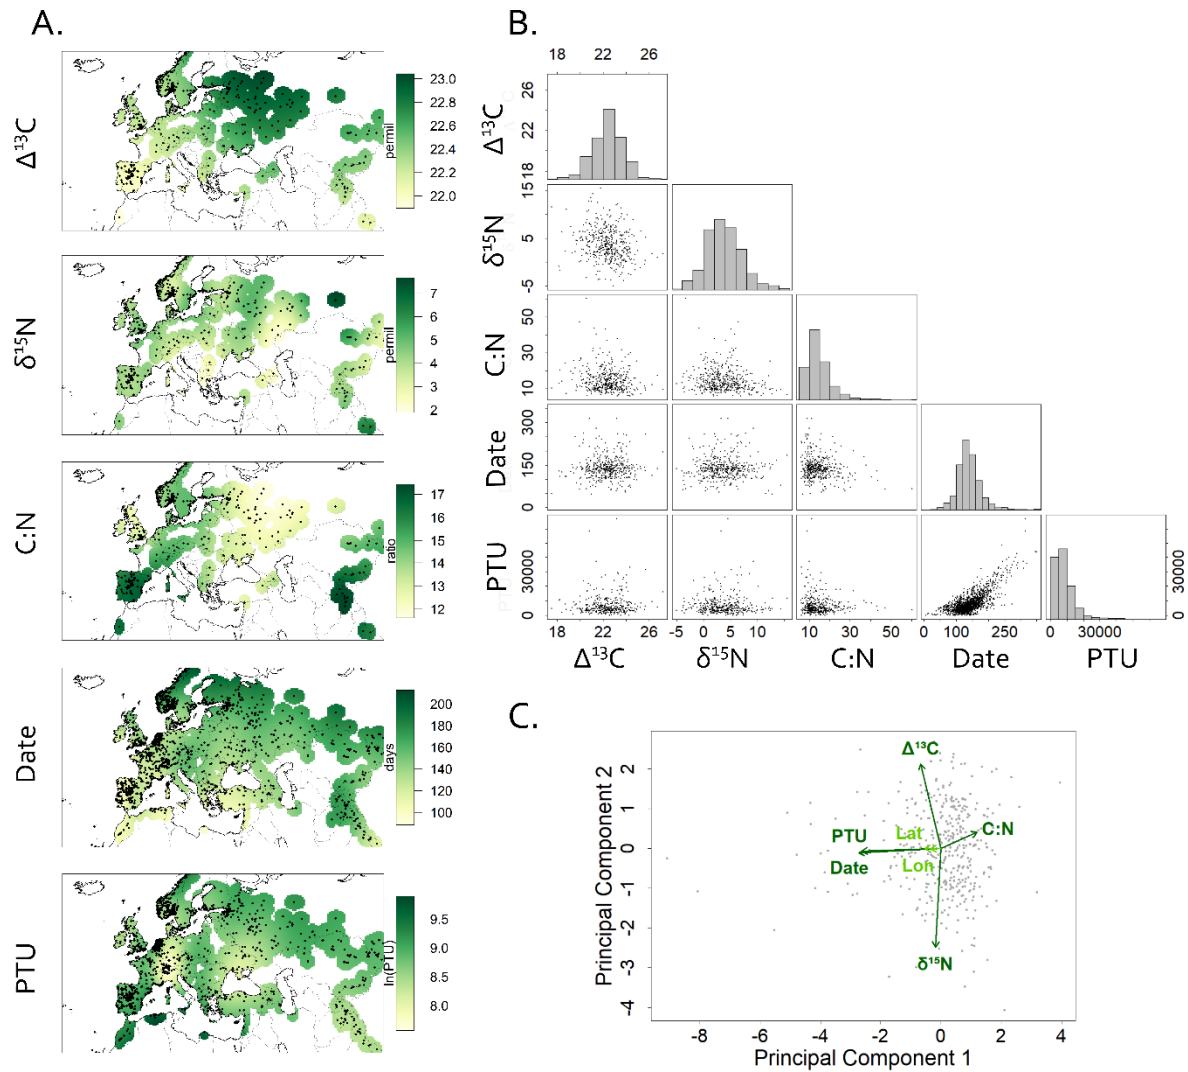

390

391 Figure 2: (A) Variation in phenotypes across the native range of *Arabidopsis* for  $\Delta^{13}\text{C}$ ,  $\delta^{15}\text{N}$ ,  
392 C:N, collection date, and photothermal units (PTU) at collection. Color indicates the fitted mean  
393 value (spatially-varying intercept) of the phenotype from the year-only model. For example,  
394 collection date is earlier in the Mediterranean in comparison to other regions; however, PTUs are  
395 lowest in the central part of the range. (B) Correlations between phenotypes in this study.  
396 Histograms of the measured values of each phenotype are plotted along the diagonal. (C) PCA of  
397 phenotypes. Correlations of phenotypes with principal components are plotted as arrows, with  
398 length multiplied by 3 for ease of viewing. Latitude (correlation with first PC  $r = -0.182$ ) and

399 longitude (correlation with first PC  $r = -0.115$ ) are plotted for geographic context, though they  
400 were not included in PCA. Arrows for latitude and longitude are scaled equally to the arrows for  
401 phenotype correlations.

402

403 *Spatial variation in long-term average phenotypes (questions 2 and 3)*

404 We visualized spatial diversity in phenotypes by plotting the spatial intercept surfaces in the year  
405 only models (Figure 2A). All phenotypes showed significant spatial variation (all GAM smooth  
406 terms significantly different from zero).  $\Delta^{13}\text{C}$  was lower in the Iberian Peninsula and higher in  
407 Russia (GAM smooth term,  $p = 0.0002$ ).  $\delta^{15}\text{N}$  varied across the range, but with less pronounced  
408 spatial gradients (GAM smooth term,  $p = 0.01$ ). C:N was higher in the Iberian Peninsula and  
409 central Asia and lower in Russia (GAM smooth term,  $p = 9\text{e-}05$ ). Collection day was earlier  
410 along the Atlantic coast and Mediterranean (GAM smooth term,  $p = <2\text{e-}16$ ). Despite this, PTU  
411 at collection still was higher in the Mediterranean region as well as at far northern, continental  
412 sites (GAM smooth term,  $p = <2\text{e-}16$ ).

413 *Temporal*

*change in*  
*phenotypes*

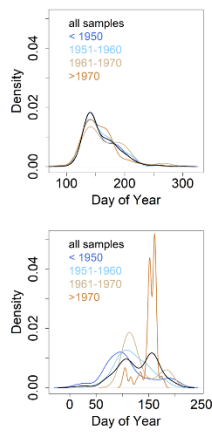

A. Day of Collection

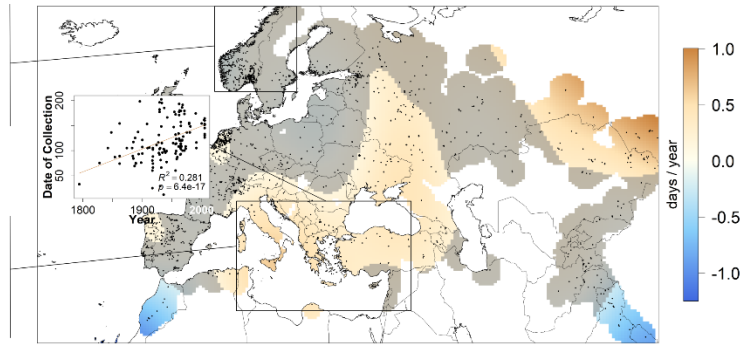

B. Photothermal Units

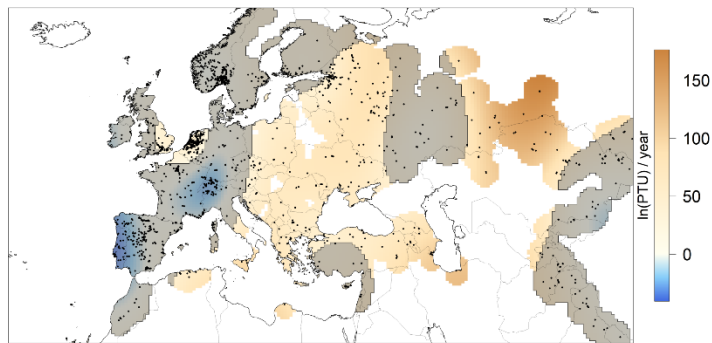

C.  $\delta^{15}\text{N}$

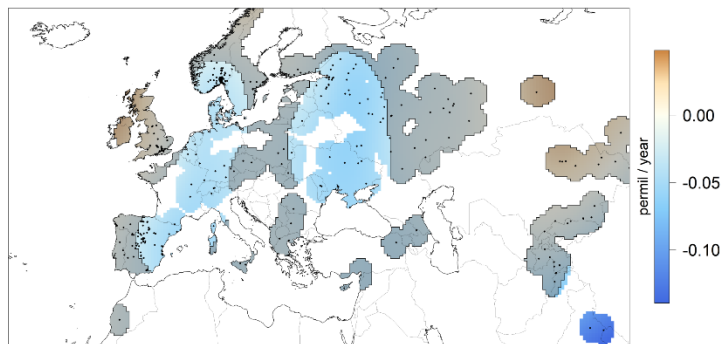

D. C:N

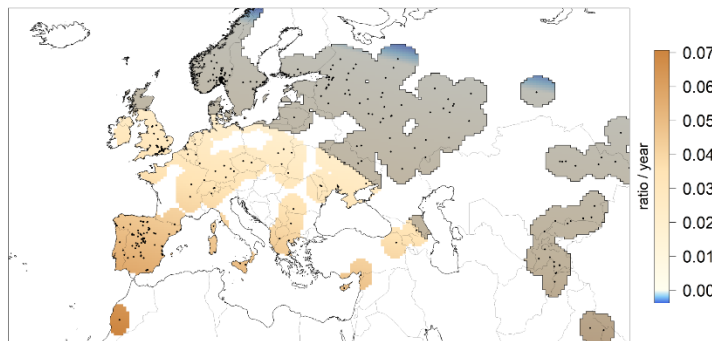



431

432

433 Figure 3: Change in phenotypes across years for collection date (A), photothermal units (B),  $\delta$   
434 nitrogen (C), and C:N (D). Color indicates the value of the coefficient for year in the model  
435 excluding climate variables, gray shading indicates regions where estimated coefficient is not  
436 significantly different from 0. For example, day of collection and photothermal units have  
437 significantly increased over time in most of the range, but with some exceptions for day of  
438 collection in the south. Inset scatterplot in A shows the significant increase in collection date  
439 with year for samples in the boxed Mediterranean region. Plots to the left of A show the density  
440 of collection dates through the year remains stable through time for Scandinavian collections  
441 within the boxed region (top) but shift toward more collections late in the year in the boxed  
442 Mediterranean collections (bottom).

443

444

445 Several phenotypes have changed significantly across large regions over the study period (1794-  
446 2010, Figure 3 above). For example, C:N ratio increased in later years in much of southwestern  
447 Europe.  $\delta^{15}\text{N}$  decreased significantly throughout most of the range. Collection date and PTUs  
448 became significantly later in many regions from the Mediterranean to Central Asia, although  
449 collection date became significantly earlier in the extreme south (Morocco and Himalayas).  
450 There was no significant temporal trend in  $\Delta^{13}\text{C}$  (not shown).  
451 The year trends in phenotypes across the study period were likely partly related to underlying  
452 climate variation. However, collection date, C:N, and  $\delta^{15}\text{N}$  were still significantly associated

453 with year of collection even when accounting for temporal anomalies in climate from 1901-2010  
454 (Figures S6, S12, S14). PTUs were even more negatively related to year of collection after  
455 controlling for temporal anomalies (Figure S8). A notable discrepancy is that Iberian collections  
456 were collected significantly earlier in later years when yearly climate anomalies were accounted  
457 for (Figure S6). There was still no significant temporal trend in  $\Delta^{13}\text{C}$ .

458

459 *Phenotype associations with spatiotemporal climate gradients (questions 2 and 3)*

460 **Date of collection** – In years (temporal climate anomaly models) with a relatively warm April  
461 plants were collected significantly earlier (Figure 4A). Similarly, in locations (spatial climate  
462 models) with warmer temperatures plants were on average collected earlier in the year, though in  
463 many regions these coefficients were non-significant (Figure S7A, B). We also tested  
464 associations with July aridity index (precipitation/PET) and found that plants were collected  
465 significantly earlier in years (temporal climate anomaly models) with dry summers in  
466 Central/Eastern Europe (Figure 4B).

467

A. Mean April Temperature

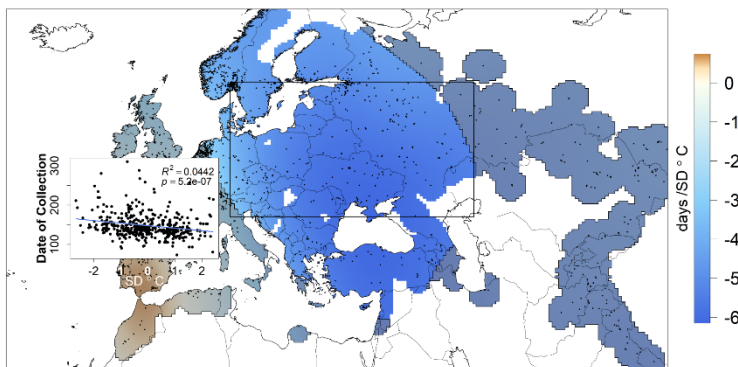

B. July Aridity Index

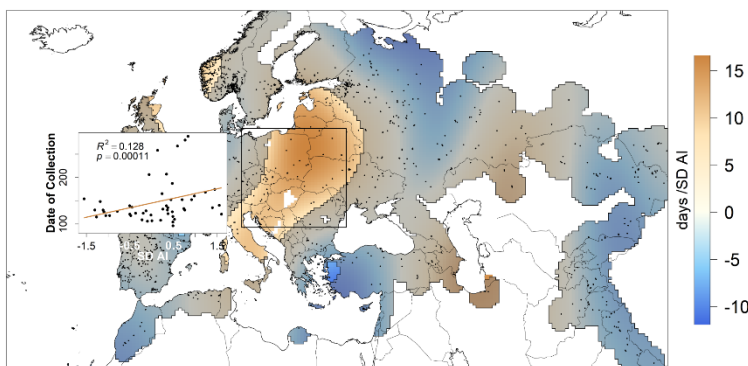

468

469 Figure 4: Association between collection day of *Arabidopsis* temporal mean April temperature  
470 anomalies (A) and July aridity index anomalies (B) (compared to 50-year average). Color  
471 indicates the value of the coefficient of the April mean temperature anomaly or July aridity index  
472 anomaly term. In years where April was warmer (positive anomalies), plants were collected  
473 earlier (a negative relationship). In wetter years, plants were collected later in Eastern Europe.  
474 Shading indicates regions where estimated coefficient is not significantly different from 0.  
475 Scatterplots of phenotype measures for individuals within the boxed areas show a decreasing  
476 collection date with mean April temperature anomaly and an increasing collection date with July  
477 aridity index anomaly in Eastern Europe and a decreasing collection date in Central Asia.

478

479

480 **Photothermal units** – To standardize spatiotemporal variation in developmental periods, we  
481 also modeled climate associations with PTUs. As expected, there were few areas where  
482 temperature anomalies were significantly associated with PTUs, likely due to the ability of PTUs  
483 to account for plastic responses (Figure S8). However, in some areas, accumulated PTUs at  
484 collection changed significantly in association with spatial temperature gradients, perhaps  
485 indicating spatial genetic differences in phenology (Figure S9). Locations with warmer Aprils  
486 had plants collected at more PTUs in East-Central Europe and fewer PTUs around the Aegean  
487 and Northern Asia. In the spatial climate model, plants from wetter areas in the Mediterranean  
488 were collected at lower PTUs (Figure S8, S9).

489

490  **$\Delta^{13}\text{C}$  Carbon** – Wet summers were not significantly related to  $\Delta^{13}\text{C}$  in any region in either the  
491 temporal climate anomaly or spatial climate models (Figure S10, S11). Spatial variation in mean  
492 April temperatures was not significantly related to  $\Delta^{13}\text{C}$ , but plants from locations of colder  
493 Januaries did have lower  $\Delta^{13}\text{C}$  in Northern Asia and the Iberian Peninsula. (Figure S11B).  
494 Although elevation was not included in final models for reasons discussed above, replacing year  
495 with elevation in the temporal climate anomaly model showed a significant negative association  
496 between elevation and  $\Delta^{13}\text{C}$  (Figure S18D). Including elevation reduced the significance of the  
497 relationship between spatial variation in January temperature and  $\Delta^{13}\text{C}$ .

498

499  **$\delta^{15}\text{Nitrogen}$**  –  $\delta^{15}\text{N}$  was significantly higher in wetter years in Iberia, Asia, and Central Europe,  
500 (Figure S12C), but lower in the North of France. Spatial variation in minimum January  
501 temperatures was significantly positively related to  $\delta^{15}\text{N}$  around the North Sea (Figure S13B).

502

503 **Leaf C:N** – For the temporal climate anomaly model, plants collected in years with warmer  
504 winters in Iberia had significantly lower C:N ratios (Figure S14B). Leaf C:N differed in response  
505 to April mean temperature and January minimum temperature among locations (spatial climate  
506 models, Figure S15), although the patterns were mostly insignificant.

## 507 **Discussion**

508 Widely distributed species often exhibit considerable phenotypic diversity, a large portion of  
509 which may be driven by adaptive plastic and evolutionary responses to environmental gradients.  
510 Previous studies of intraspecific trait variation in response to environment have tended to focus  
511 on genetic variation of environmental responses in common gardens (*e.g.* Wilczek *et al.* 2009;  
512 Kenney *et al.* 2014), temporal trends in phenology from well-monitored sites (*e.g.* CaraDonna *et*  
513 *al.*, 2014), or field sampling of individuals from a small number of sites (*e.g.* Jung, Violle,  
514 Mondy, Hoffmann, & Muller, 2010). Here, we complement this literature by studying change in  
515 traits across an entire species range over two centuries, giving us a window into drivers of  
516 intraspecific diversity and regional differences in global change biology. From the accumulated  
517 effort contained in natural history collections, we tested hypotheses about variation in life history  
518 and physiology in response to environment. We observed modest evidence of coordinated  
519 phenological-physiological axes of variation for *Arabidopsis* in nature. We found later flowering  
520 times and higher accumulated photothermal units over the study period across most of the range  
521 and lower  $\delta^{15}\text{N}$  and higher C:N in more recent collections. Additionally, we observed distinct  
522 regional differences in phenology,  $\Delta^{13}\text{C}$ , and C:N in response to rainfall and temperature,  
523 potentially due to genetic differences among populations.

524

525 *Intraspecific variation in life history and physiology shows little coordination along a single*  
526 *major axis (question 1)*

527 We found little evidence for tight coordination among studied phenotypes, fitting with some past  
528 studies that found weak to no support for a single major axis in intraspecific trait variation in

529 response to environment across diverse plant growth forms (e.g. Albert *et al.* 2010; Wright &  
530 Sutton & Grier 2012). Common garden experiments often find substantial genetic covariation  
531 between the traits we studied possibly due to pleiotropy or selection maintaining correlated  
532 variation (Des Marais *et al.*, 2012; Kenney *et al.*, 2014; McKay *et al.*, 2003). By contrast, the  
533 massively complex environmental variation organisms experience in the wild may combine with  
534 genotype-by-environment interactions to generate high dimensional trait variation among  
535 individuals in nature.

536 Nevertheless, we found modest evidence of a life history-physiology axis: plants collected later  
537 in the year had low leaf C:N, indicative of a fast-growing resource acquisitive strategy with low  
538 investment in C for structure and high investment in N for photosynthesis. The C:N/collection  
539 date axis is probably not due to later collections being at later developmental stages, since we  
540 would expect plants collected later in development to have allocated nitrogen away from leaves,  
541 lowering C:N. Instead, a strategy of higher leaf C:N may be adaptive for rapid-cycling plants  
542 germinating and flowering within a season (spring/summer annuals), which we expect to be  
543 collected later in the year due to later germination, contrasted with slower-growing genotypes  
544 known to require vernalization for early spring flowering over a winter annual habit. Indeed, Des  
545 Marais *et al.* (2012) found that vernalization-requiring (winter annual) *Arabidopsis* genotypes  
546 had lower leaf N than genotypes not requiring vernalization for flowering, the latter of which  
547 could also behave as spring or summer annuals.

548 The negative correlation we observed between  $\Delta^{13}\text{C}$  and  $\delta^{15}\text{N}$  has been reported by other authors  
549 and suggested to be a result of independent responses to multiple correlated environmental  
550 variables rather than a biological constraint. Environmental variables with opposing effects on  
551  $\Delta^{13}\text{C}$  and  $\delta^{15}\text{N}$  include soil, temperature, and rainfall patterns (Hartman & Danin, 2010; Liu *et*

552 al., 2007; Peri et al., 2012), due to depletion of soil N and changes in stomatal opening, and  
553 atmospheric carbon (Bloom, Burger, Asensio, & Cousins, 2010), which increases carbon uptake  
554 while suppressing nitrate assimilation.

555

556 *Arabidopsis* life history and physiology vary across spatial environmental gradients, suggesting  
557 adaptive responses to long-term environmental conditions (question 2)

558 Geographic clines in traits in nature may be due to adaptive responses to environment. However,  
559 the spatial differences in traits or trait changes through time we observed are difficult to ascribe  
560 to genetic or plastic causes because of unknown genotype-environment interactions in the field  
561 and the confounding of environmental gradients and population genetic structure. The 1001  
562 Genomes Project identified genetic clusters of *Arabidopsis* that were somewhat geographically  
563 structured but noted that these clusters overlapped and were distributed across a wide range of  
564 environments (Alonso-Blanco et al., 2016) (see Figure S5 for a map of the clusters). The patterns  
565 of significant phenotype-environment relationships we observed spanned multiple genetic  
566 clusters, making it unclear how much of a role these broad genetic groupings play in determining  
567 environmental response. The phenotype-environment relationships we observed followed our  
568 expectations for how phenology could affect fitness through earlier flowering times in response  
569 to warmth and both earlier and later flowering in response to drier environments. Physiological  
570 traits were less well aligned with our predictions for adaptive response; we did not find low  $\Delta^{13}\text{C}$   
571 and high C:N associated with environments or years of water stress.

572

573 *Physiology, lack of correspondence to the Leaf Economic Spectrum*



574 The Leaf Economic Spectrum and fast/slow life history predictions were not well supported by  
575 our results for how C:N,  $\Delta^{13}\text{C}$ , and  $\delta^{15}\text{N}$  respond to climate, since we saw both positive and  
576 negative trends with temperature and aridity depending on geographical region. This may be due  
577 to the intraspecific nature of our study, as opposed to the interspecific data often used to support  
578 the LES (Albert et al., 2010; Elmore, Craine, Nelson, & Guinn, 2017). In addition, our study may  
579 have overlooked the effects of edaphic conditions on C:N and  $\delta^{15}\text{N}$ . C:N over most of the native  
580 range was insignificantly related to spatial and temporal gradients of temperature and aridity  
581 index (July precipitation/PET) but increased with year as seen in grassland communities due to  
582 rising  $C_a$  (Gill et al., 2002). Likewise,  $\delta^{15}\text{N}$  over most of the range neither decreased with aridity  
583 index nor responded to temperature as expected, but did decrease with year as previously  
584 reported (McLauchlan, Ferguson, Wilson, Ocheltree, & Craine, 2010), possibly due to  $\text{CO}_2$   
585 enrichment.

586 Similarly, we did not see strong relationships between aridity index and  $\Delta^{13}\text{C}$ .  $\Delta^{13}\text{C}$  was  
587 expected to be related to rainfall and temperature due to  $\Delta^{13}\text{C}$  being a proxy for stomatal gas  
588 exchange (Diefendorf et al., 2010; Farquhar et al., 1989). There are at least three potential  
589 explanations for weak  $\Delta^{13}\text{C}$  relationships with climate. First, we observed both positive and  
590 negative trends for aridity and date of collection, consistent with the hypothesis that *Arabidopsis*  
591 exhibits both drought escaping and drought avoiding genotypes. The phenological response to  
592 moisture of rapid flowering (drought escape strategy) could confine growth to periods of high  
593 moisture, obviating any stomatal closure in response to soil drying (and hence no effect on  
594  $\Delta^{13}\text{C}$ ). Stated simply, phenology and physiology cannot be treated as completely independent  
595 traits. Second, variation in plant traits we did not directly consider may affect  $\Delta^{13}\text{C}$ . Gas  
596 exchange and carbon assimilation depend in part on leaf architecture and physiology traits like

597 venation, root allocation, and mesophyll conductance (Brodribb, Feild, & Jordan, 2007; Easlon  
598 et al., 2014; Schulze, Turner, Nicolle, & Schumacher, 2006), which could limit responses in  
599  $\Delta^{13}\text{C}$ . For example, given the role of roots in sensing drought and triggering stomatal response  
600 (Christmann, Hoffmann, Teplova, Grill, & Muller, 2004), greater investment in roots could allow  
601 plants in relatively drier conditions to maintain open stomata, preventing decreases in  $C_i$  and  
602 leading to no observed climate effect on  $\Delta^{13}\text{C}$ . Third, elevated atmospheric partial  $\text{CO}_2$  could  
603 mitigate climate effects on  $\Delta^{13}\text{C}$  by increasing the efficiency of stomatal gas exchange (Drake,  
604 Hanson, Lowrey, & Sharp, 2017). Local investigations of the patterns we found could  
605 complement our results by characterizing the underlying ecophysiological and life history  
606 mechanisms driving intraspecific variation.

607

#### 608 *Phenology, high variation across space*

609 We found strong spatial gradients in two measures of phenology, suggesting that adaptive  
610 responses to climate drive long-term trait differences among regions. Locations that were  
611 warmer than average in either April or January corresponded to significantly earlier collection  
612 dates, consistent with temperature's positive effect on growth rate (Wilczek et al., 2009). In  
613 addition, our models provided support that some phenological variation did reflect seasonality of  
614 moisture availability. We found that *Arabidopsis* was collected significantly earlier in years with  
615 dry summers in central Europe and at significantly lower PTU in regions of wet summers around  
616 the Mediterranean, suggesting drought escape or avoidance strategies, respectively, could be  
617 important in those regions. Alternatively, later collections in wetter years could be the result of  
618 multiple successful generations due to the extra rainfall. This ambiguity illustrates an important  
619 caveat in using collection date and PTU to study *Arabidopsis* in the wild. Because we cannot

620 differentiate changes in total life span from changes in germination start date, shifts in phenology  
621 (the timing of an organism's life to seasonal conditions) does not necessarily indicate shifts in  
622 life history. Nevertheless, the observed regional variation in the response of collection date and  
623 PTU to climate variables provides valuable insight into how different populations experience  
624 their environment and suggest areas for more direct study.

625

626 *Changes in Arabidopsis life history and physiology over the last two centuries track climate,*  
627 *suggesting adaptive responses (question 3)*

628 Increasing global temperatures were expected to increase relative growth rate and hasten  
629 germination, decreasing flowering time as measured by collection date. In addition, atmospheric  
630 CO<sub>2</sub> enrichment was expected to increase  $\Delta^{13}\text{C}$  (Drake et al., 2017) and C:N and decrease  $\delta^{15}\text{N}$   
631 (Bloom et al., 2010). With increasing environmental nitrogen due to human activity (Galloway et  
632 al., 2004), we expected  $\delta^{15}\text{N}$  to decrease.

633 Our findings were largely consistent with these hypotheses in the year models for leaf  
634 physiology.  $\Delta^{13}\text{C}$  did not significantly change through time across the native range, which could  
635 be due to life history shifts as mentioned above or differential response to aridity gradients across  
636 the locations sampled masking the effect of elevated CO<sub>2</sub> (Drake et al., 2017). Geographic  
637 variation in the strength of the relationships for other traits could be due to underlying genetic  
638 variation or interaction with environmental factors we did not account for. Nevertheless, C:N  
639 increased and  $\delta^{15}\text{N}$  decreased as expected across large portions of the native range.

640 For collection date and PTU, however, our models returned the surprising result of later  
641 collection rather than earlier, despite earlier collections in warmer years. The fact that the

642 relationship between warmth and collection date was spatially variable, and insignificant in some  
643 regions, may indicate areas of contrasting phenological response, perhaps due to lost  
644 vernalization signal or variable effects on germination (Burghardt, Edwards, & Donohue, 2016).  
645 Variation across space in phenological response to climate change has been shown before and  
646 may be due to genetic differences among populations or due to interactions with other  
647 environmental variables (Park et al., 2018). *Arabidopsis* is known to complete a generation  
648 within a single season, climate permitting, and warmer climates may even allow for fall  
649 flowering (Fournier-Level et al., 2013; Wilczek et al., 2009). If warmer temperatures enable a  
650 greater number of spring or summer germinants to flower before winter in regions such as  
651 Central Europe, we would expect to see later collection dates in more recent years (Burghardt et  
652 al., 2015). Regions that did not show later collection dates through time might be limited in  
653 generational cycles due to summer drought or very short growing seasons. For instance, early  
654 flowering in the spring has been implicated as an important strategy for *Arabidopsis* in the  
655 Iberian Peninsula to escape seasonal heat and water limitation that curtail growth in later months  
656 (Wolfe & Tonsor, 2014).

657 Our findings of later collection dates through the study period (1798-2010) may surprise some  
658 readers due to previously observed acceleration of temperate spring phenology (Parmesan &  
659 Yohe, 2003). However, we modeled changes in mean phenological response to environment,  
660 which can be weakly related to either tail of phenology trait distributions (CaraDonna et al.,  
661 2014). Individuals on the extremes, such as first-flowering individuals, are often the primary  
662 focus of studies showing accelerated spring phenology in recent years. Why might *Arabidopsis*  
663 flower later even as global temperatures rise? First, anthropogenic land use change may drive  
664 phenology by favoring spring germinants, *e.g.* if disturbances favor faster life cycles. Second,

665 warming climate or increasing atmospheric pCO<sub>2</sub> may favor alternate life histories by increasing  
666 relative growth rate, thus allowing spring or fall germinants to complete their life cycle before  
667 conditions degrade at the end of a growing season. Later collections in more recent years might  
668 represent an increasing proportion of fast-growing spring or summer annuals as opposed to  
669 winter annuals. Whatever the cause of *Arabidopsis* flowering later, these phenological changes  
670 may have important ecological effects, such as altered biotic interactions.

671 We found evidence that trait correlations may be changing through time. For example, in some  
672 regions both C:N and date of collection have significantly increased over the past 200 years  
673 (around the Eastern Mediterranean), while in other regions date of collection decreased while  
674 C:N increased over time (Morocco and the Iberian Peninsula) (Figure 1). If the negative  
675 relationship between leaf C:N and flowering time that we observed is truly an axis of adaptive  
676 tradeoff between fast and slow life histories, this tradeoff may be changing at different rates  
677 among regions with time. Changing environments might reshape biological constraints on  
678 adaptive plant responses (Sgrò & Hoffmann, 2004).

679

680 *Our approach, technical limitations in herbaria data to surmount in future studies*

681 Understanding how environmental variation drives the intraspecific diversity in broadly  
682 distributed species has been challenging due to logistics of large spatiotemporal scales. However,  
683 advances in digitization of museum specimens and the generation of global gridded  
684 spatiotemporal environmental data are opening a new window into large scale patterns of  
685 biodiversity. One challenge of herbarium specimens is that they typically present a single  
686 observation of a mature, reproductive individuals. Thus, these specimens contain limited

687 information on phenology and physiology at earlier life stages (*e.g.* seedling plants), which can  
688 have subsequently strong impacts on later observed stages. Use of developmental models  
689 (Burghardt et al., 2015) might allow one to backcast potential developmental trajectories using  
690 herbarium specimens and climate data, to make predictions about phenology of germination and  
691 transition to flowering. In addition, herbaria collections are often biased by factors such as  
692 geography, species, and climate (Daru et al., 2018; Loiselle et al., 2008). Hierarchical sampling  
693 through repeated collections in the same region could improve the confidence of our model in  
694 representing phenotypic change through time.

695 Generalized additive models are a flexible approach to model phenotype responses to  
696 environment that might differ spatially among populations (MacGillivray et al., 2010). These  
697 models allow the data to inform on spatial variation in the trends studied, unlike approaches that  
698 bin individuals into discrete and arbitrarily bounded regions. Herbarium records represent  
699 imperfect and biased samples of natural populations (Daru et al., 2018), and future efforts may  
700 benefit from additional information that might allow us to account for these biases. Here, we  
701 sampled a very large number of specimens across continents and centuries, perhaps reducing the  
702 effect of biases associated with specific collectors. Nevertheless, as museum informatics advance  
703 it may become possible to explicitly model potential sources of bias, for example those arising  
704 from collecting behavior of specific researchers.

705

## 706 *Conclusion*

707 Widely distributed species often harbor extensive intraspecific trait diversity. Natural history  
708 collections offer a window into this diversity and in particular allow investigation of long-term

709 responses to anthropogenic change across species ranges. Here we show that spatiotemporal  
710 climate gradients explain much of this diversity but nevertheless much of the phenotypic  
711 diversity in nature for the model plant remains to be explained.

712

## 713 **Acknowledgements**

714 Hundreds of professional and amateur botanists collected the specimens studied here. The staff at  
715 herbaria at Oslo Natural History Museum, Kew Gardens, Real Jardin Botanico, Komarov  
716 Botanical Garden, the New York Botanical Garden, and the British Museum of Natural History  
717 gave permission for tissue sampling. Michelle Brown provided essential assistance in collecting  
718 herbarium tissue. Jason Bonnette helped coordinate sample preparation. Major assistance in  
719 digitizing of specimens was provided by Patrick Herné. Eugene Shakirov aided in translating  
720 Russian specimen labels. Data from the MNHN in Paris were obtained thanks to the  
721 participatory science program "Les Herbonautes" (MNHN/Tela Botanica) which is part of  
722 Infrastructure Nationale e-RECOLNAT: ANR-11-INBS-0004. Additional volunteers from the  
723 Atlas of Living Australia helped with digitization and georeferencing. Funding was provided by  
724 an Earth Institute fellowship to JRL.

725 The authors report no commercial or other relationships relevant to the content of this article that  
726 would represent a conflict of interest.

727

728 **Tables**

729 Table 1: Hypothesized responses of phenotypes to increases in temperature, rainfall, or year, or  
 730 how traits would change along a faster life history strategy.

731 Year trends are predicted due to elevated CO<sub>2</sub>, nitrogen deposition, or elevated temperatures.

732 Citations for hypotheses: (Amundson et al., 2003<sup>1</sup>; BassiriRad et al., 2003<sup>2</sup>; Burghardt et al.,

733 2015<sup>3</sup>; Craine et al., 2009<sup>4</sup>; Diefendorf et al., 2010<sup>5</sup>; Drake, Hanson, Lowrey, & Sharp, 2017<sup>6</sup>;

734 Gill et al., 2002<sup>7</sup>; McLauchlan, Ferguson, Wilson, Ocheltree, & Craine, 2010<sup>8</sup>; Menzel et al.,

735 2006<sup>9</sup>; Ordoñez et al., 2009<sup>10</sup>; Peñuelas et al., 2004<sup>11</sup>; Reich, Hungate, & Luo, 2006<sup>12</sup>; Seibt,

736 Rajabi, Griffiths, & Berry, 2008<sup>13</sup>; Sparks & Carey, 2006<sup>14</sup>; Stock & Evans, 2006<sup>15</sup>; I. J. Wright

737 et al., 2004<sup>16</sup>)

|                       | Temperature                                                        | Rainfall         | Year                | Fast Life History |
|-----------------------|--------------------------------------------------------------------|------------------|---------------------|-------------------|
| $\Delta^{13}\text{C}$ | + <sup>13</sup>                                                    | + <sup>5</sup>   | + <sup>6</sup>      | +                 |
| $\delta^{15}\text{N}$ | + <sup>1,4</sup>                                                   | - <sup>1,4</sup> | - <sup>2,8,15</sup> | No change         |
| C:N                   | - <sup>10</sup> in cold regions<br>+ <sup>16</sup> in warm regions | - <sup>16</sup>  | + <sup>7,8,12</sup> | -                 |
| Photothermal Units    | + or no change                                                     | +                | No change           | -                 |
| Collection Date       | - <sup>3,9</sup>                                                   | + <sup>11</sup>  | - <sup>9,14</sup>   | -                 |

738



739 *Comparison of results to hypotheses*

740 Table 2: Expected phenotype responses to increases in temperature, rainfall, or year and

741 observed model output.

742 For some phenotypes a single trend over time was observed; however, most phenotypes showed

743 variation in responses to temperature and rainfall across the range.

|                       | Temperature |                            | Rainfall |                         | Year      |               |
|-----------------------|-------------|----------------------------|----------|-------------------------|-----------|---------------|
|                       | Expected    | Observed                   | Expected | Observed                | Expected  | Observed      |
| $\Delta^{13}\text{C}$ | -           | -, mainly insignificant    | +        | -, mainly insignificant | +         | insignificant |
| $\delta^{15}\text{N}$ | +           | +, -, mainly insignificant | -        | +                       | -         | -             |
| C:N                   | -<br>+      | +, -, mainly insignificant | -        | insignificant           | +         | +             |
| Photothermal Units    | +           | +, -                       | +        | +, -                    | No change | +             |
| Collection Date       | -           | -, +                       | +        | +, -                    | -         | +, -          |

744

745 **References**

- 746 Adams, W. W., Stewart, J. J., Cohu, C. M., Muller, O., & Demmig-Adams, B. (2016). Habitat  
747 Temperature and Precipitation of *Arabidopsis thaliana* Ecotypes Determine the Response of  
748 Foliar Vasculature, Photosynthesis, and Transpiration to Growth Temperature. *Frontiers in*  
749 *Plant Science*, 7. <https://doi.org/10.3389/fpls.2016.01026>
- 750 Albert, C. H., Thuiller, W., Yoccoz, N. G., Soudant, A., Boucher, F., Saccone, P., & Lavorel, S.  
751 (2010). Intraspecific functional variability: extent, structure and sources of variation.  
752 *Journal of Ecology*, 98(3), 604–613. <https://doi.org/10.1111/j.1365-2745.2010.01651.x>
- 753 Alonso-Blanco, C., Andrade, J., Becker, C., Bemm, F., Bergelson, J., Borgwardt, K. M. M., ...  
754 Zhou, X. (2016). 1,135 genomes reveal the global pattern of polymorphism in *Arabidopsis*  
755 *thaliana*. *Cell*, 166(2), 481–491. <https://doi.org/10.1016/j.cell.2016.05.063>
- 756 Amundson, R., Austin, A. T., Schuur, E. A. G., Yoo, K., Matzek, V., Kendall, C., ... Baisden,  
757 W. T. (2003). Global patterns of the isotopic composition of soil and plant nitrogen. *Global*  
758 *Biogeochemical Cycles*, 17(1).
- 759 Anderegg, L. D. L., Berner, L. T., Badgley, G., Sethi, M. L., Law, B. E., & HilleRisLambers, J.  
760 (2018). Within-species patterns challenge our understanding of the leaf economics  
761 spectrum. *Ecology Letters*. <https://doi.org/10.1111/ele.12945>
- 762 Atwell, S., Huang, Y. S., Vilhjálmsson, B. J., Willems, G., Horton, M., Li, Y., ... Nordborg, M.  
763 (2010). Genome-wide association study of 107 phenotypes in *Arabidopsis thaliana* inbred  
764 lines. *Nature*. <https://doi.org/10.1038/nature08800>
- 765 BassiriRad, H., Constable, J. V. H., Lussenhop, J., Kimball, B. A., Norbys, R. J., Oechel, W. C.,

- 766 ... Silim, S. (2003). Widespread foliage  $\delta^{15}\text{N}$  depletion under elevated  $\text{CO}_2$ : Inferences for  
767 the nitrogen cycle. *Global Change Biology*. [https://doi.org/10.1046/j.1365-](https://doi.org/10.1046/j.1365-2486.2003.00679.x)  
768 [2486.2003.00679.x](https://doi.org/10.1046/j.1365-2486.2003.00679.x)
- 769 Blonder, B., Violle, C., Bentley, L. P., & Enquist, B. J. (2011). Venation networks and the origin  
770 of the leaf economics spectrum. *Ecology Letters*, *14*(2), 91–100.  
771 <https://doi.org/10.1111/j.1461-0248.2010.01554.x>
- 772 Bloom, A. J., Burger, M., Asensio, J. S. R., & Cousins, A. B. (2010). Carbon dioxide enrichment  
773 inhibits nitrate assimilation in wheat and *arabidopsis*. *Science*.  
774 <https://doi.org/10.1126/science.1186440>
- 775 Both, C., Artemyev, A. V., Blaauw, B., Cowie, R. J., Dekhuijzen, A. J., Eeva, T., ... Visser, M.  
776 E. (2004). Large-scale geographical variation confirms that climate change causes birds to  
777 lay earlier. *Proceedings of the Royal Society B: Biological Sciences*, *271*(1549), 1657–1662.  
778 <https://doi.org/10.1098/rspb.2004.2770>
- 779 Brachi, B., Faure, N., Horton, M., Flahauw, E., Vazquez, A., Nordborg, M., ... Roux, F. (2010).  
780 Linkage and association mapping of *Arabidopsis thaliana* flowering time in nature. *PLoS*  
781 *Genetics*, *6*(5), 40. <https://doi.org/10.1371/journal.pgen.1000940>
- 782 Bradshaw, A. D. (1965). Evolutionary significance of phenotypic plasticity in plants. *Advances*  
783 *in Genetics*. [https://doi.org/10.1016/S0065-2660\(08\)60048-6](https://doi.org/10.1016/S0065-2660(08)60048-6)
- 784 Brodribb, T. J., Feild, T. S., & Jordan, G. J. (2007). Leaf maximum photosynthetic rate and  
785 venation are linked by hydraulics. *Plant Physiology*, *144*(4), 1890–1898.  
786 <https://doi.org/10.1104/pp.107.101352>

- 787 Burghardt, L. T., Edwards, B. R., & Donohue, K. (2016). Multiple paths to similar germination  
788 behavior in *Arabidopsis thaliana*. *New Phytologist*, 209(3), 1301–1312.  
789 <https://doi.org/10.1111/nph.13685>
- 790 Burghardt, L. T., Metcalf, C. J. E., Wilczek, A. M., Schmitt, J., & Donohue, K. (2015). Modeling  
791 the influence of genetic and environmental variation on the expression of plant life cycles  
792 across landscapes. *The American Naturalist*, 185(2), 212–227.
- 793 CaraDonna, P. J., Iler, A. M., & Inouye, D. W. (2014). Shifts in flowering phenology reshape a  
794 subalpine plant community. *Proceedings of the National Academy of Sciences*, 111(13),  
795 4916–4921. <https://doi.org/10.1073/pnas.1323073111>
- 796 Christmann, A., Hoffmann, T., Teplova, I., Grill, E., & Muller, A. (2004). Generation of active  
797 pools of abscisic acid revealed by *in vivo* imaging of water-stressed *Arabidopsis*. *Plant*  
798 *Physiology*, 137(1), 209–219. <https://doi.org/10.1104/pp.104.053082>
- 799 Craine, J. M., Elmore, A. J., Aidar, M. P. M., Bustamante, M., Dawson, T. E., Hobbie, E. A., ...  
800 Wright, I. J. (2009). Global patterns of foliar nitrogen isotopes and their relationships with  
801 climate, mycorrhizal fungi, foliar nutrient concentrations, and nitrogen availability. *New*  
802 *Phytologist*, 183(4), 980–992. <https://doi.org/10.1111/j.1469-8137.2009.02917.x>
- 803 Daru, B. H., Park, D. S., Primack, R. B., Willis, C. G., Barrington, D. S., Whitfeld, T. J. S., ...  
804 Davis, C. C. (2018). Widespread sampling biases in herbaria revealed from large-scale  
805 digitization. *New Phytologist*. <https://doi.org/10.1111/nph.14855>
- 806 Davis, C. C., Willis, C. G., Connolly, B., Kelly, C., & Ellison, A. M. (2015). Herbarium records  
807 are reliable sources of phenological change driven by climate and provide novel insights  
808 into species' phenological cueing mechanisms. *American Journal of Botany*, 102(10),

- 809 1599–1609. <https://doi.org/10.3732/ajb.1500237>
- 810 Des Marais, D. L., McKay, J. K., Richards, J. H., Sen, S., Wayne, T., & Juenger, T. E. (2012).  
811 Physiological genomics of response to soil drying in diverse *Arabidopsis* accessions. *The*  
812 *Plant Cell*. <https://doi.org/10.1105/tpc.112.096180>
- 813 Diefendorf, A. F., Mueller, K. E., Wing, S. L., Koch, P. L., & Freeman, K. H. (2010). Global  
814 patterns in leaf <sup>13</sup>C discrimination and implications for studies of past and future climate.  
815 *Proceedings of the National Academy of Sciences*, *107*(13), 5738–5743.  
816 <https://doi.org/10.1073/pnas.0910513107>
- 817 Drake, B. L., Hanson, D. T., Lowrey, T. K., & Sharp, Z. D. (2017). The carbon fertilization  
818 effect over a century of anthropogenic CO<sub>2</sub> emissions: higher intracellular CO<sub>2</sub> and more  
819 drought resistance among invasive and native grass species contrasts with increased water  
820 use efficiency for woody plant. *Global Change Biology*, *23*(2), 782–792.  
821 <https://doi.org/10.1111/gcb.13449>
- 822 Easlon, H. M., Nemali, K. S., Richards, J. H., Hanson, D. T., Juenger, T. E., & McKay, J. K.  
823 (2014). The physiological basis for genetic variation in water use efficiency and carbon  
824 isotope composition in *Arabidopsis thaliana*. *Photosynthesis Research*, *119*(1–2), 119–129.
- 825 Elmore, A. J., Craine, J. M., Nelson, D. M., & Guinn, S. M. (2017). Continental scale variability  
826 of foliar nitrogen and carbon isotopes in *Populus balsamifera* and their relationships with  
827 climate. *Scientific Reports*, *7*(1). <https://doi.org/10.1038/s41598-017-08156-x>
- 828 Evans, J. R. (1989). Photosynthesis and nitrogen relationships in leaves of C<sub>3</sub> plants. *Oecologia*,  
829 *78*(1), 9–19.

- 830 Exposito-Alonso, M., Vasseur, F., Ding, W., Wang, G., Burbano, H. A., & Weigel, D. (2018).  
831 Genomic basis and evolutionary potential for extreme drought adaptation in *Arabidopsis*  
832 *thaliana*. *Nature Ecology and Evolution*. <https://doi.org/10.1038/s41559-017-0423-0>
- 833 Farquhar, G., Ehleringer, J., & Hubick, K. (1989). Carbon isotope discrimination and  
834 photosynthesis. *Annual Review of Plant Physiology and Plant Molecular Biology*, 40(1),  
835 503–537. <https://doi.org/10.1146/annurev.pp.40.060189.002443>
- 836 Farquhar, G., O’Leary, M., & Berry, J. (1982). On the relationship between carbon isotope  
837 discrimination and the intercellular carbon dioxide concentration in leaves. *Australian*  
838 *Journal of Plant Physiology*, 9(2), 121–137. <https://doi.org/10.1071/PP9820121>
- 839 Fournier-Level, A., Wilczek, A. M., Cooper, M. D., Roe, J. L., Anderson, J., Eaton, D., ...  
840 Schmitt, J. (2013). Paths to selection on life history loci in different natural environments  
841 across the native range of *Arabidopsis thaliana*. *Molecular Ecology*, 22(13), 3552–3566.  
842 <https://doi.org/10.1111/mec.12285>
- 843 Galloway, J. N., Dentener, F. J., Capone, D. G., Boyer, E. W., Howarth, R. W., Seitzinger, S. P.,  
844 ... Holland, E. A. (2004). Nitrogen cycles: past, present, and future. *Biogeochemistry*,  
845 70(2), 153–226.
- 846 Gill, R. A., Polley, H. W., Johnson, H. B., Anderson, L. J., Maherali, H., & Jackson, R. B.  
847 (2002). Nonlinear grassland responses to past and future atmospheric CO<sub>2</sub>. *Nature*.  
848 <https://doi.org/10.1038/417279a>
- 849 Grime, J. P. (1977). Evidence for the existence of three primary strategies in plants and its  
850 relevance to ecological and evolutionary theory. *The American Naturalist*.  
851 <https://doi.org/10.1086/283244>

- 852 Harris, I., Jones, P. D., Osborn, T. J., & Lister, D. H. (2014). Updated high-resolution grids of  
853 monthly climatic observations—the CRU TS3. 10 Dataset. *International Journal of*  
854 *Climatology*, 34(3), 623–642.
- 855 Hartman, G., & Danin, A. (2010). Isotopic values of plants in relation to water availability in the  
856 Eastern Mediterranean region. *Oecologia*. <https://doi.org/10.1007/s00442-009-1514-7>
- 857 Henn, J. J., Buzzard, V., Enquist, B. J., Halbritter, A. H., Klanderud, K., Maitner, B. S., ...  
858 Vandvik, V. (2018). Intraspecific trait variation and phenotypic plasticity mediate alpine  
859 plant species response to climate change. *Frontiers in Plant Science*.  
860 <https://doi.org/10.3389/fpls.2018.01548>
- 861 Hijmans, R. J. (2017). geosphere: spherical trigonometry. Retrieved from [https://cran.r-](https://cran.r-project.org/package=geosphere)  
862 [project.org/package=geosphere](https://cran.r-project.org/package=geosphere)
- 863 Hijmans, R. J., Cameron, S. E., Parra, J. L., Jones, P. G., & Jarvis, A. (2005). Very high  
864 resolution interpolated climate surfaces for global land areas. *International Journal of*  
865 *Climatology*, 25(15), 1965–1978.
- 866 Himelblau, E., & Amasino, R. M. (2001). Nutrients mobilized from leaves of *Arabidopsis*  
867 *thaliana* during leaf senescence. *Journal of Plant Physiology*. [https://doi.org/10.1078/0176-](https://doi.org/10.1078/0176-1617-00608)  
868 [1617-00608](https://doi.org/10.1078/0176-1617-00608)
- 869 Hoffmann, M. H. (2002). Biogeography of *Arabidopsis thaliana* (L.) Heynh. (Brassicaceae).  
870 *Journal of Biogeography*, 29(1), 125–134. [https://doi.org/10.1046/j.1365-](https://doi.org/10.1046/j.1365-2699.2002.00647.x)  
871 [2699.2002.00647.x](https://doi.org/10.1046/j.1365-2699.2002.00647.x)
- 872 Horton, M. W., Hancock, A. M., Huang, Y. S., Toomajian, C., Atwell, S., Auton, A., ...

- 873 Bergelson, J. (2012). Genome-wide patterns of genetic variation in worldwide *Arabidopsis*  
874 *thaliana* accessions from the RegMap panel. *Nature Genetics*.  
875 <https://doi.org/10.1038/ng.1042>
- 876 Hu, Y.-K., Pan, X., Liu, G.-F., Li, W.-B., Dai, W.-H., Tang, S.-L., ... Dong, M. (2015). Novel  
877 evidence for within-species leaf economics spectrum at multiple spatial scales. *Frontiers in*  
878 *Plant Science*. <https://doi.org/10.3389/fpls.2015.00901>
- 879 Joshi, J., Schmid, B., Caldeira, M. C., Dimitrakopoulos, P. G., Good, J., Harris, R., ... Lawton, J.  
880 H. (2001). Local adaptation enhances performance of common plant species. *Ecology*  
881 *Letters*. <https://doi.org/10.1046/j.1461-0248.2001.00262.x>
- 882 Jung, V., Violle, C., Mondy, C., Hoffmann, L., & Muller, S. (2010). Intraspecific variability and  
883 trait-based community assembly. *Journal of Ecology*, 98(5), 1134–1140.  
884 <https://doi.org/10.1111/j.1365-2745.2010.01687.x>
- 885 Kenney, A. M., McKay, J. K., Richards, J. H., & Juenger, T. E. (2014). Direct and indirect  
886 selection on flowering time, water-use efficiency (WUE,  $\delta^{13}\text{C}$ ), and WUE plasticity to  
887 drought in *Arabidopsis thaliana*. *Ecology and Evolution*, 4(23), 4505–4521.  
888 <https://doi.org/10.1002/ece3.1270>
- 889 Koenker, A. R., & Koenker, M. R. (2011). Package ‘quantreg.’ *Annals of Statistics*.
- 890 Lang, P. L. M., Willems, F. M., Scheepens, J. F., Burbano, H. A., & Bossdorf, O. (2018). Using  
891 herbaria to study global environmental change. *New Phytologist*.  
892 <https://doi.org/10.1111/nph.15401>
- 893 Lasky, J. R., Des Marais, D. L., McKay, J. K., Richards, J. H., Juenger, T. E., & Keitt, T. H.



- 894 (2012). Characterizing genomic variation of *Arabidopsis thaliana*: the roles of geography  
895 and climate. *Molecular Ecology*, *21*(22), 5512–5529. [https://doi.org/10.1111/j.1365-](https://doi.org/10.1111/j.1365-294X.2012.05709.x)  
896 [294X.2012.05709.x](https://doi.org/10.1111/j.1365-294X.2012.05709.x)
- 897 Lasky, J. R., Forester, B. R., & Reimherr, M. (2018). Coherent synthesis of genomic associations  
898 with phenotypes and home environments. *Molecular Ecology Resources*, *18*(1), 91–106.
- 899 Leimu, R., & Fischer, M. (2008). A meta-analysis of local adaptation in plants. *PLoS ONE*.  
900 <https://doi.org/10.1371/journal.pone.0004010>
- 901 Linhart, Y. B., & Grant, M. C. (2002). Evolutionary significance of local genetic differentiation  
902 in plants. *Annual Review of Ecology and Systematics*.  
903 <https://doi.org/10.1146/annurev.ecolsys.27.1.237>
- 904 Liu, X., Zhao, L., Gasaw, M., Gao, D., Qin, D., & Ren, J. (2007). Foliar  $\delta^{13}\text{C}$  and  $\delta^{15}\text{N}$  values of  
905  $\text{C}_3$  plants in the Ethiopia Rift Valley and their environmental controls. *Chinese Science*  
906 *Bulletin*. <https://doi.org/10.1007/s11434-007-0165-5>
- 907 Loiselle, B. A., Jørgensen, P. M., Consiglio, T., Jiménez, I., Blake, J. G., Lohmann, L. G., &  
908 Montiel, O. M. (2008). Predicting species distributions from herbarium collections: Does  
909 climate bias in collection sampling influence model outcomes? *Journal of Biogeography*.  
910 <https://doi.org/10.1111/j.1365-2699.2007.01779.x>
- 911 Lovell, J. T., Juenger, T. E., Michaels, S. D., Lasky, J. R., Platt, A., Richards, J. H., ... McKay, J.  
912 K. (2013). Pleiotropy of FRIGIDA enhances the potential for multivariate adaptation.  
913 *Proceedings of the Royal Society B: Biological Sciences*.  
914 <https://doi.org/10.1098/rspb.2013.1043>

- 915 Ludlow, M. M. (1989). Strategies of response to water stress. In K. H. Kreeb, H. Richter, & T.  
916 M. Hinckley (Eds.), *Structural and functional responses to environmental stresses: water*  
917 *shortage* (pp. 269–281). Berlin: SPB Academic Publishers.
- 918 MacGillivray, F., Hudson, I. L., & Lowe, A. J. (2010). Herbarium collections and photographic  
919 images: Alternative data sources for phenological research. In *Phenological Research:*  
920 *Methods for Environmental and Climate Change Analysis* (pp. 425–461). Dordrecht:  
921 Springer Netherlands. [https://doi.org/10.1007/978-90-481-3335-2\\_19](https://doi.org/10.1007/978-90-481-3335-2_19)
- 922 Matesanz, S., Gianoli, E., & Valladares, F. (2010). Global change and the evolution of  
923 phenotypic plasticity in plants. *Annals of the New York Academy of Sciences*.  
924 <https://doi.org/10.1111/j.1749-6632.2010.05704.x>
- 925 McCarroll, D., & Loader, N. J. (2004). Stable isotopes in tree rings. *Quaternary Science*  
926 *Reviews*, 23(7–8), 771–801.
- 927 McKay, J. K., Richards, J. H., & Mitchell-Olds, T. (2003). Genetics of drought adaptation in  
928 *Arabidopsis thaliana*: I. Pleiotropy contributes to genetic correlations among ecological  
929 traits. *Molecular Ecology*. <https://doi.org/10.1046/j.1365-294X.2003.01833.x>
- 930 McLauchlan, K. K., Ferguson, C. J., Wilson, I. E., Ocheltree, T. W., & Craine, J. M. (2010).  
931 Thirteen decades of foliar isotopes indicate declining nitrogen availability in central North  
932 American grasslands. *New Phytologist*, 187(4), 1135–1145. [https://doi.org/10.1111/j.1469-](https://doi.org/10.1111/j.1469-8137.2010.03322.x)  
933 [8137.2010.03322.x](https://doi.org/10.1111/j.1469-8137.2010.03322.x)
- 934 Menzel, A., Sparks, T. H., Estrella, N., Koch, E., Aasa, A., Ahas, R., ... Zust, A. (2006).  
935 European phenological response to climate change matches the warming pattern. *Global*  
936 *Change Biology*. <https://doi.org/10.1111/j.1365-2486.2006.01193.x>

- 937 Miller-Rushing, A. J., Primack, R. B., Primack, D., & Mukunda, S. (2006). Photographs and  
938 herbarium specimens as tools to document phenological changes in response to global  
939 warming. *American Journal of Botany*, *93*(11), 1667–1674.  
940 <https://doi.org/10.3732/ajb.93.11.1667>
- 941 New, M., Hulme, M., & Jones, P. (2000). Representing twentieth-century space-time climate  
942 variability. Part II: Development of 1901-96 monthly grids of terrestrial surface climate.  
943 *Journal of Climate*, *13*(13), 2217–2238. [https://doi.org/10.1175/1520-  
944 0442\(2000\)013<2217:RTCSTC>2.0.CO;2](https://doi.org/10.1175/1520-0442(2000)013<2217:RTCSTC>2.0.CO;2)
- 945 Ordoñez, J. C., Van Bodegom, P. M., Witte, J. P. M., Wright, I. J., Reich, P. B., & Aerts, R.  
946 (2009). A global study of relationships between leaf traits, climate and soil measures of  
947 nutrient fertility. *Global Ecology and Biogeography*, *18*(2), 137–149.  
948 <https://doi.org/10.1111/j.1466-8238.2008.00441.x>
- 949 Ostrowski, M. F., David, J., Santoni, S., McKhann, H., Reboud, X., Le Corre, V., ... Bataillon,  
950 T. (2006). Evidence for a large-scale population structure among accessions of *Arabidopsis*  
951 *thaliana*: Possible causes and consequences for the distribution of linkage disequilibrium.  
952 *Molecular Ecology*. <https://doi.org/10.1111/j.1365-294X.2006.02865.x>
- 953 Pardo, L. H., McNulty, S. G., Boggs, J. L., & Duke, S. (2007). Regional patterns in foliar <sup>15</sup>N  
954 across a gradient of nitrogen deposition in the northeastern US. *Environmental Pollution*,  
955 *149*(3), 293–302. <https://doi.org/10.1016/j.envpol.2007.05.030>
- 956 Park, D. S., Breckheimer, I., Williams, A. C., Law, E., Ellison, A. M., & Davis, C. C. (2018).  
957 Herbarium specimens reveal substantial and unexpected variation in phenological  
958 sensitivity across the eastern United States. *Philosophical Transactions of the Royal Society*

- 959 *of London. Series B, Biological Sciences*. <https://doi.org/10.1098/rstb.2017.0394>
- 960 Parmesan, C., & Yohe, G. (2003). A globally coherent fingerprint of climate change impacts  
961 across natural systems. *Nature*, *421*(6918), 37–42. <https://doi.org/10.1038/nature01286>
- 962 Peñuelas, J., Filella, I., Zhang, X., Llorens, L., Ogaya, R., Lloret, F., ... Terradas, J. (2004).  
963 Complex spatiotemporal phenological shifts as a response to rainfall changes. *New*  
964 *Phytologist*. <https://doi.org/10.1111/j.1469-8137.2004.01003.x>
- 965 Peri, P. L., Ladd, B., Pepper, D. A., Bonser, S. P., Laffan, S. W., & Amelung, W. (2012). Carbon  
966 ( $\delta^{13}\text{C}$ ) and nitrogen ( $\delta^{15}\text{N}$ ) stable isotope composition in plant and soil in Southern  
967 Patagonia's native forests. *Global Change Biology*. [https://doi.org/10.1111/j.1365-](https://doi.org/10.1111/j.1365-2486.2011.02494.x)  
968 [2486.2011.02494.x](https://doi.org/10.1111/j.1365-2486.2011.02494.x)
- 969 Platt, A., Horton, M., Huang, Y. S., Li, Y., Anastasio, A. E., Mulyati, N. W., ... Borevitz, J. O.  
970 (2010). The scale of population structure in *Arabidopsis thaliana*. *PLoS Genetics*.  
971 <https://doi.org/10.1371/journal.pgen.1000843>
- 972 R Core Team. (2018). R: a language and environment for statistical computing. Vienna, Austria.  
973 <https://doi.org/10.1007/978-3-540-74686-7>
- 974 Reich, P. B. (2014). The world-wide “fast-slow” plant economics spectrum: a traits manifesto.  
975 *Journal of Ecology*, *102*(2), 275–301. <https://doi.org/10.1111/1365-2745.12211>
- 976 Reich, P. B., Hungate, B. A., & Luo, Y. (2006). Carbon-nitrogen interactions in terrestrial  
977 ecosystems in response to rising atmospheric carbon dioxide. *Annual Review of Ecology,*  
978 *Evolution, and Systematics*, *37*(1), 611–636.  
979 <https://doi.org/10.1146/annurev.ecolsys.37.091305.110039>

- 980 Reich, P. B., Wright, I. J., Cavender-Bares, J., Craine, J. M., Oleksyn, J., Westoby, M., &  
981 Walters, M. B. (2003). The evolution of plant functional variation: traits, spectra, and  
982 strategies. *International Journal of Plant Sciences*, *164*(S3), S143–S164.  
983 <https://doi.org/10.1086/374368>
- 984 Sack, L., Scoffoni, C., McKown, A. D., Frole, K., Rawls, M., Havran, J. C., ... Tran, T. (2012).  
985 Developmentally based scaling of leaf venation architecture explains global ecological  
986 patterns. *Nature Communications*, *3*, 837. <https://doi.org/10.1038/ncomms1835>
- 987 Sartori, K. F. R., Vasseur, F., Violle, C., Baron, E., Gerard, M., Rowe, N., ... Masclef, D. (2018).  
988 Leaf economics guides slow-fast adaptation across the geographic range of *A. thaliana*.  
989 *BioRxiv*, 487066.
- 990 Schulze, E. D., Turner, N. C., Nicolle, D., & Schumacher, J. (2006). Leaf and wood carbon  
991 isotope ratios, specific leaf areas and wood growth of *Eucalyptus* species across a rainfall  
992 gradient in Australia. *Tree Physiology*, *26*(4), 479–492.  
993 <https://doi.org/10.1093/treephys/26.4.479>
- 994 Seibt, U., Rajabi, A., Griffiths, H., & Berry, J. A. (2008). Carbon isotopes and water use  
995 efficiency: Sense and sensitivity. *Oecologia*. <https://doi.org/10.1007/s00442-007-0932-7>
- 996 Sgrò, C. M., & Hoffmann, A. A. (2004). Genetic correlations, tradeoffs and environmental  
997 variation. *Heredity*. <https://doi.org/10.1038/sj.hdy.6800532>
- 998 Sparks, T. H., & Carey, P. D. (2006). The responses of species to climate over two centuries: an  
999 analysis of the Marsham phenological record, 1736-1947. *The Journal of Ecology*.  
1000 <https://doi.org/10.2307/2261570>

- 1001 Stinchcombe, J. R., Weinig, C., Ungerer, M., Olsen, K. M., Mays, C., Halldorsdottir, S. S., ...  
1002 Schmitt, J. (2004). A latitudinal cline in flowering time in *Arabidopsis thaliana* modulated  
1003 by the flowering time gene FRIGIDA. *Proceedings of the National Academy of Sciences*.  
1004 <https://doi.org/10.1073/pnas.0306401101>
- 1005 Stock, W. D., & Evans, J. R. (2006). Effects of water availability, nitrogen supply and  
1006 atmospheric CO<sub>2</sub> concentrations on plant nitrogen natural abundance values. *Functional*  
1007 *Plant Biology*, 33(3), 219–227. <https://doi.org/10.1071/FP05188>
- 1008 Stocking, C. R., & Ongun, A. (1962). The intracellular distribution of some metallic elements in  
1009 leaves. *American Journal of Botany*, 49(3), 284–289.
- 1010 Tabas-Madrid, D., Méndez-Vigo, B., Arteaga, N., Marcer, A., Pascual-Montano, A., Weigel, D.,  
1011 ... Alonso-Blanco, C. (2018). Genome-wide signatures of flowering adaptation to climate  
1012 temperature: Regional analyses in a highly diverse native range of *Arabidopsis thaliana*.  
1013 *Plant Cell and Environment*, 41(8), 1806–1820. <https://doi.org/10.1111/pce.13189>
- 1014 Turesson, G. (1922). The genotypical response of the plant species to the habitat. *Hereditas*.  
1015 <https://doi.org/10.1111/j.1601-5223.1922.tb02734.x>
- 1016 United Nations Environment Program. (1997). *World atlas of desertification*. (N. Middleton &  
1017 D. Thomas, Eds.) (2nd ed.).
- 1018 Vasseur, F., Violle, C., Enquist, B. J., Granier, C., & Vile, D. (2012). A common genetic basis to  
1019 the origin of the leaf economics spectrum and metabolic scaling allometry. *Ecology Letters*,  
1020 15(10), 1149–1157. <https://doi.org/10.1111/j.1461-0248.2012.01839.x>
- 1021 Westoby, M. (1998). A leaf-height-seed (LHS) plant ecology strategy scheme. *Plant and Soil*.

- 1022 <https://doi.org/10.1023/A:1004327224729>
- 1023 Wheeler, D. C., & Waller, L. A. (2009). Comparing spatially varying coefficient models: a case  
1024 study examining violent crime rates and their relationships to alcohol outlets and illegal  
1025 drug arrests. *Journal of Geographical Systems*, 11(1), 1–22. [https://doi.org/10.1007/s10109-](https://doi.org/10.1007/s10109-008-0073-5)  
1026 [008-0073-5](https://doi.org/10.1007/s10109-008-0073-5)
- 1027 Wilczek, A. M., Cooper, M. D., Korves, T. M., & Schmitt, J. (2014). Lagging adaptation to  
1028 warming climate in *Arabidopsis thaliana*. *Proceedings of the National Academy of*  
1029 *Sciences*, 111(22), 7906–7913. <https://doi.org/10.1073/pnas.1406314111>
- 1030 Wilczek, A. M., Roe, J. L., Knapp, M. C., Cooper, M. D., Lopez-Gallego, C., Martin, L. J., ...  
1031 Schmitt, J. (2009). Effects of genetic perturbation on seasonal life history plasticity.  
1032 *Science*, 323(5916), 930–934. <https://doi.org/10.1126/science.1165826>
- 1033 Willis, C. G., Ellwood, E. R., Primack, R. B., Davis, C. C., Pearson, K. D., Gallinat, A. S., ...  
1034 Soltis, P. S. (2017). Old plants, new tricks: phenological research using herbarium  
1035 specimens. *Trends in Ecology and Evolution*, 32(7), 531–546.  
1036 <https://doi.org/10.1016/j.tree.2017.03.015>
- 1037 Wolfe, M. D., & Tonsor, S. J. (2014). Adaptation to spring heat and drought in northeastern  
1038 Spanish *Arabidopsis thaliana*. *New Phytologist*. <https://doi.org/10.1111/nph.12485>
- 1039 Wood, S. N. (2006). *Generalized additive models: an introduction with R. Texts in Statistical*  
1040 *Science* (1st ed.). Chapman and Hall/CRC. [https://doi.org/10.1111/j.1541-](https://doi.org/10.1111/j.1541-0420.2007.00905_3.x)  
1041 [0420.2007.00905\\_3.x](https://doi.org/10.1111/j.1541-0420.2007.00905_3.x)
- 1042 Wood, S. N. (2011). Fast stable restricted maximum likelihood and marginal likelihood

- 1043 estimation of semiparametric generalized linear models. *Journal of the Royal Statistical*  
1044 *Society. Series B: Statistical Methodology*, 73(1), 3–36. <https://doi.org/10.1111/j.1467->  
1045 9868.2010.00749.x
- 1046 Wright, I. J., Reich, P. B., Westoby, M., Ackerly, D. D., Baruch, Z., Bongers, F., ... Villar, R.  
1047 (2004). The worldwide leaf economics spectrum. *Nature*, 428(6985), 821–827.  
1048 <https://doi.org/10.1038/nature02403>
- 1049 Wright, J. P., & Sutton-Grier, A. (2012). Does the leaf economic spectrum hold within local  
1050 species pools across varying environmental conditions? *Functional Ecology*, 26(6), 1390–  
1051 1398. <https://doi.org/10.1111/1365-2435.12001>
- 1052 Yee, T. W., & Mackenzie, M. (2002). Vector generalized additive models in plant ecology.  
1053 *Ecological Modelling*. [https://doi.org/10.1016/S0304-3800\(02\)00192-8](https://doi.org/10.1016/S0304-3800(02)00192-8)
- 1054 Yee, T. W., & Mitchell, N. D. (2006). Generalized additive models in plant ecology. *Journal of*  
1055 *Vegetation Science*. <https://doi.org/10.2307/3236170>
- 1056 Zhu, Y., Siegwolf, R. T. W., Durka, W., & Körner, C. (2010). Phylogenetically balanced  
1057 evidence for structural and carbon isotope responses in plants along elevational gradients.  
1058 *Oecologia*, 162(4), 853–863. <https://doi.org/10.1007/s00442-009-1515-6>
- 1059
- 1060
