## Effects of two centuries of global environmental variation on phenology and physiology of *Arabidopsis thaliana*

200 years of *A. thaliana* phenotypic variation

Victoria L. DeLeo<sup>1</sup>, Duncan N. L. Menge<sup>2</sup>, Ephraim M. Hanks<sup>3</sup>, Thomas E. Juenger<sup>4</sup>, Jesse R. Lasky<sup>5,6,7</sup>

<sup>1</sup>Intercollege Graduate Degree Program in Plant Biology  
Pennsylvania State University  
University Park, PA 16802

<sup>2</sup>Department of Ecology, Evolution, and Environmental Biology  
Columbia University  
New York, NY 10027  
dm2972@columbia.edu

<sup>3</sup>Department of Statistics  
Pennsylvania State University  
University Park, PA 16802  
hanks@psu.edu

<sup>4</sup>Department of Integrative Biology  
University of Texas at Austin  
Austin, TX 78712  
tjuenger@austin.utexas.edu

<sup>5</sup>Department of Biology  
Pennsylvania State University  
University Park, PA 16802  
lasky@psu.edu

Past affiliations:

<sup>6</sup>Department of Ecology, Evolution, and Environmental Biology  
Columbia University  
New York, NY 10027

<sup>7</sup>Earth Institute  
Columbia University  
New York, NY 10025

Corresponding information:

Victoria DeLeo  
814-863-8854  
vldeleo@psu.edu

## Abstract

Intraspecific trait variation is caused by genetic and plastic responses to environment. This intraspecific diversity is captured in immense natural history collections, giving us a window into trait variation across continents and through centuries of environmental shifts. We measured phenotypes on a 216-year time series of *Arabidopsis thaliana* accessions from across the native range. We applied spatially varying coefficient models to quantify region-specific trends in trait coordination and trait responses to climate gradients. All traits exhibited significant change across space and/or through time. For example,  $\delta^{15}\text{N}$  decreased over time across much of the range and leaf C:N increased, consistent with predictions based on anthropogenic changes in land use and atmosphere. Plants were collected later in the growing season in more recent years in many regions, possibly because populations shifted toward more spring germination and summer flowering as opposed to fall germination and spring flowering. When climate variables were considered, collection dates were earlier in warmer years, while summer rainfall had opposing associations with collection date depending on regions. There was modest correlation among traits, indicating that there is not a single life history/physiology axis. Nevertheless, leaf C:N was low for summer- versus spring-collected plants, consistent with a life history-physiology axis from slow-growing winter annuals to fast-growing spring/summer annuals. Regional heterogeneity in phenotype trends indicates complex responses to spatiotemporal environmental gradients potentially due to geographic genetic variation and climate interactions with other aspects of environment. Our study demonstrates how natural history collections can be used to broadly characterize trait responses to environment, revealing heterogeneity in response to anthropogenic change.

**Keywords:** Generalized Additive Model, abiotic stress, climate change,  $\Delta^{13}\text{C}$ , phenology

## Introduction

An organism's fitness is determined by the interaction between its traits and its environment. Organisms respond to environmental gradients in diverse ways, including genetic and plastic shifts in life history, phenology, and physiology (Burghardt, Metcalf, Wilczek, Schmitt, & Donohue, 2015; Reich, 2014; Wright et al., 2004). Spatial and temporal environmental gradients can promote phenotypic plasticity or generate varying selection across which populations adapt to local conditions (Bradshaw, 1965; Henn et al., 2018; Joshi et al., 2001; Leimu & Fischer, 2008; Linhart & Grant, 2002; Matesanz, Gianoli, & Valladares, 2010; Turesson, 1922). By studying how phenology and physiology change across environments through space and time we learn about mechanisms of adaptive environmental response and biological constraints.

Anthropogenic global change has led to dramatic phenotypic changes in many organisms. For example, many species are shifting their ranges poleward and temperate spring phenology is advancing (Parmesan & Yohe, 2003). However, anthropogenic global change is multi-faceted, involving climate, nitrogen deposition, atmospheric CO<sub>2</sub>, and land use. Our understanding of the specific environmental drivers of phenotypic change has been hampered by insufficient datasets. Furthermore, many populations and species do not exhibit the stereotypic phenological and range shifts (Both et al., 2004; CaraDonna, Iler, & Inouye, 2014; Park et al., 2018). These diverse responses can be caused by geographic variation in the rate of environmental change or by intraspecific genetic variation, clouding our understanding of anthropogenic impacts.

Published studies provide multiple (and sometimes conflicting) hypotheses for phenotype responses to specific environmental gradients. Using large, multispecies datasets, Reich and colleagues argued that multiple aspects of leaf trait variation are coordinated to generate a single life history and physiology axis from fast to slow that also corresponds to changes in dominant vegetation types across environments (known as the Leaf Economic Spectrum, LES) (Reich, 2014; Reich et al., 2003; Wright et al., 2004). Although empirical community-wide turnover in mean traits across environments often follows LES predictions, it is unclear whether *within* species trait variation responds similarly (Anderegg et al., 2018; Hu et al., 2015; J. P. Wright & Sutton-Grier, 2012). The LES predicts that lower nitrogen concentration leaves (high C:N, low proportion N) are found in drier and in hotter areas, in part because of investment in non-photosynthetic leaf features, especially veins (Blonder, Violle, Bentley, & Enquist, 2011; Sack et al., 2012) or mesophyll cell walls (Easlon et al., 2014). Leaf nitrogen physiology is an important aspect of environmental response, since leaf nitrogen is critical to photosynthetic capacity (Evans, 1989; Stocking & Ongun, 1962) and photorespiration (Rachmilevitch, Cousins, & Bloom, 2004). At the community level, leaf N (proportion of mass) generally increases with mean annual temperature, at least below the highest latitudes (Ordoñez et al., 2009; Reich & Oleksyn, 2004), and increases with greater precipitation (Reich et al., 2003). Fast-growing plants, including many accessions of our study species, *Arabidopsis thaliana* (hereafter, *Arabidopsis*), are expected to invest more in photosynthetic capacity (N) and less in structural elements (C). *Arabidopsis* exhibits genetic variation that weakly corresponds to LES predictions (Easlon et al., 2014; Sartori et al., 2018), though little is known about trait variation in natural plants.

Isotopic signatures in tissue provide additional clues to organismal responses to environmental conditions.  $\Delta^{13}\text{C}$ , which measures discrimination against  $^{13}\text{C}$  in photosynthesis, is an indicator of  $\text{pCO}_2$  within leaves ( $C_i$ ) relative to atmospheric  $\text{pCO}_2$  ( $C_a$ ) (Farquhar, O'Leary, & Berry, 1982).  $C_i$  declines when stomata are closed, which may be a conservative life history response to soil drying, while  $C_a$  declines with elevation. Thus, we expect  $\Delta^{13}\text{C}$  to increase in moist growing environments and decrease with elevation (Diefendorf, Mueller, Wing, Koch, & Freeman, 2010; Farquhar et al., 1982; Zhu, Siegwolf, Durka, & Körner, 2010).  $\delta^{15}\text{N}$  (the ratio of  $^{15}\text{N}$  to  $^{14}\text{N}$ ) can be affected by the same resource acquisition traits as leaf proportion nitrogen (Stock & Evans, 2006). However, leaf N and  $\delta^{15}\text{N}$  may also reflect N deposition and biogeochemical cycling (e.g. Pardo *et al.* 2007), thus their variation may directly reflect changing environments rather than strictly biological traits. Under controlled conditions, leaf isotope and nutrient composition tend to exhibit high intraspecific genetic and plastic variation (Chardon, Barthélémy, Daniel-Vedele, & Masclaux-Daubresse, 2010; Nienhuis, Sills, Martin, & King, 1994), which may reflect adaptive potential in natural environments.

In seasonal locations, phenology shapes and is shaped by the environment a plant encounters during vulnerable stages. As with many plants, *Arabidopsis* development can be highly sensitive to moisture, temperature, and photoperiod (Burghardt et al., 2015; Wilczek et al., 2009). For example, although warmth can increase growth rates, many *Arabidopsis* genotypes require winter cold cues (known as vernalization) to transition to spring flowering. Phenology of many annual plants largely collapses to a life history-physiology axis between slow growing, late flowering populations and fast growing, early flowering populations. Plants with rapid life histories may have physiological traits tied to fast growth and resource acquisition (e.g. high stomatal conductance, high leaf area relative mass (Specific Leaf Area, or SLA)) (Lovell et al., 2013; McKay, Richards, & Mitchell-Olds, 2003; Reich, 2014; Sartori et al., 2018). Rapid development and reproduction can allow plants to escape drought, a strategy employed by some genotypes of *Arabidopsis* (McKay et al., 2003). Other plants exhibit traits characteristic of drought avoidance, such as minimizing water loss (e.g. through stomatal closure) and maximizing water uptake (Kenney, McKay, Richards, & Juenger, 2014; Ludlow, 1989). Fast life histories can allow spring or summer annual life cycles, where a plant germinates and flowers within a single season, while slow life histories and vernalization requirements result in a winter annual cycle, where a plant germinates in the fall and flowers the following spring.

Standardized metrics are needed to compare ecologically relevant phenological variation among sites of different climate timing and at different latitudes. Photothermal units (PTUs) integrate developmental time under favorable temperatures and light across a growing season and account for much of the environmental influence on flowering dates in *Arabidopsis* (Brachi et al., 2010; Wilczek et al., 2009). Measures of developmental time standardized to environmental conditions can better capture genetic variation in development compared to raw flowering dates in *Arabidopsis*, the latter of which are strongly driven by environment (Brachi et al., 2010). Thus, PTUs may help reveal phenological adaptation along spatial and temporal environmental gradients.



Museum collections offer broadly distributed sampling in space and time to test the relationships between phenotypes and environment in nature (Lang, Willems, Scheepens, Burbano, & Bossdorf, 2018; Willis et al., 2017). Variation in herbarium collection dates can be a reliable proxy for variation in phenology (Davis, Willis, Connolly, Kelly, & Ellison, 2015; MacGillivray, Hudson, & Lowe, 2010; Miller-Rushing, Primack, Primack, & Mukunda, 2006). Here, we leverage the immense fieldwork underlying natural history collections to investigate how intraspecific diversity is structured through time and along spatiotemporal climate gradients. Specifically, we use thousands of *Arabidopsis* specimens that span over 200 years of sampling across *Arabidopsis*' range in Eurasia and Northern Africa. We quantify the spatial patterns of *Arabidopsis*' phenotypic variation along environmental gradients, which allows us to put temporal trends in context. We hypothesized that for natural *Arabidopsis* populations, phenotype-environment correlations would follow fast-slow predictions of LES and phenology traits (Table 1). We combine these records with global gridded climate data to ask three questions about *Arabidopsis* in nature:

1. To what degree does intraspecific trait variation among wild individuals fall along a single coordinated life history-physiology axis?
2. Do life history and physiology vary across spatial environmental gradients in long-term average conditions, suggesting adaptive responses consistent with the LES?
3. Have life history and physiology changed over the last two centuries? In particular, have changes tracked climate fluctuations, suggesting adaptive responses consistent with the LES?

Table 1: Hypothesized responses of phenotypes to increases in temperature, rainfall, or year.

Year trends are predicted due to elevated CO<sub>2</sub>, nitrogen deposition, or elevated temperatures. Citations for hypotheses: (Amundson et al., 2003<sup>1</sup>; BassiriRad et al., 2003<sup>2</sup>; Burghardt et al., 2015<sup>3</sup>; Craine et al., 2009<sup>4</sup>; Diefendorf et al., 2010<sup>5</sup>; Drake, Hanson, Lowrey, & Sharp, 2017<sup>6</sup>; Gill et al., 2002<sup>7</sup>; McLauchlan, Ferguson, Wilson, Ocheltree, & Craine, 2010<sup>8</sup>; Menzel et al., 2006<sup>9</sup>; Ordoñez et al., 2009<sup>10</sup>; Peñuelas et al., 2004<sup>11</sup>; Reich, Hungate, & Luo, 2006<sup>12</sup>; Seibt, Rajabi, Griffiths, & Berry, 2008<sup>13</sup>; Sparks & Carey, 2006<sup>14</sup>; Stock & Evans, 2006<sup>15</sup>; I. J. Wright et al., 2004<sup>16</sup>)

|                       | Temperature      | Rainfall         | Year                |
|-----------------------|------------------|------------------|---------------------|
| $\Delta^{13}\text{C}$ | + <sup>13</sup>  | + <sup>5</sup>   | + <sup>6</sup>      |
| $\delta^{15}\text{N}$ | + <sup>1,4</sup> | - <sup>1,4</sup> | - <sup>2,8,15</sup> |
| C:N                   | - <sup>10</sup>  | - <sup>16</sup>  | + <sup>7,8,12</sup> |
| Photothermal Units    | + or no change   | +                | No change           |
| Collection Date       | - <sup>3,9</sup> | + <sup>11</sup>  | - <sup>9,14</sup>   |

## Materials & Methods

### *Samples*

Our set of samples (N= 3159) included *Arabidopsis thaliana* herbarium and germplasm accessions with known collection date between 1794 and 2010 from the native range of *Arabidopsis* in Europe, the Middle East, Central Asia, and North Africa (Hoffmann, 2002). For each herbarium specimen (N=2711) we visually verified species identification and reproductive status as simultaneously flowering and fruiting. Samples that were only fruited/senesced, only flowering, or had neither open flowers nor fruits were excluded to focus on a relatively uniform developmental stage (see Supplementary Table 1). This consistency is important for assessing C:N, since progression of plant development involves reallocation of nutrients, and for a meaningful characterization of phenology with collection date. Furthermore, too few samples (136/2711) were in other phenological stages to allow for a rigorous comparison. We excluded dozens of misidentified specimens, highlighting the importance of verification of information in natural history collections (cf. unverified data in some online databases). Wild-collected germplasm accessions with known collection date and location (N = 448) were included from the *Arabidopsis* Biological Resource Center (<https://abrc.osu.edu/>).

### *Leaf traits*

To test LES hypotheses for response to environment, we measured  $\Delta^{13}\text{C}$ ,  $\delta^{15}\text{N}$ , and C:N from leaf tissue of herbarium samples. We removed and pulverized leaf samples (mean weight = 2.75 mg) of a subset of our quality-checked herbarium specimens and sent them to the UC-Davis Stable Isotope Facility. In total, we obtained values for  $\delta^{15}\text{N}$ ,  $\delta^{13}\text{C}$ , C:N, and proportion N in 456 accessions, although 3 samples were missing  $\delta^{13}\text{C}$  and 1 sample was missing both C:N and proportion N values.

We measured leaf  $\delta^{13}\text{C}$  (isotope ratio), but atmospheric  $\delta^{13}\text{C}$  has changed dramatically over the time period of this study due to fossil fuel emissions. Thus we converted leaf isotope ratio ( $\delta^{13}\text{C}$ ) to discrimination ( $\Delta^{13}\text{C}$ ) using an estimate of the atmospheric  $\delta^{13}\text{C}$  time series (McCarroll & Loader, 2004) from 1850 to 2000, continuing linear extrapolation beyond 2000, using the 1850 value for earlier specimens, and the equation of Farquhar et al. (1989),  $\Delta = \frac{\delta_a - \delta_p}{1 + \delta_p}$ , where  $\delta_a$  is the isotope ratio in the atmosphere and  $\delta_p$  is the isotope ratio in plant tissue (ratios relative to a standard).

### *Phenology*

To estimate accumulated photothermal units (PTU) at date of collection, we used the equation of Burghardt et al. (2015) to model the hourly temperature values for the accumulation of sunlight degree hours between January 1 and dusk on the date of collection at each accession's coordinate. Daylength was approximated with the R package *geosphere* (Hijmans, 2017). Monthly temperature values for the period 1900-2010 came from the Climate Research Unit time

series dataset (New, Hulme, & Jones, 2000). PTUs were only calculated for specimens collected after 1900 due to the historical limit of the monthly temperature data. Daily temperatures were interpolated from monthly temperatures using the function `splinefun` in R on the “periodic” setting.

### *Statistical analysis*

*Arabidopsis* displays substantial genetic diversity in environmental response between genotypes from different regions (e.g. Exposito-Alonso et al., 2018; Lasky, Forester, & Reimherr, 2018). Thus, we employed a regression model with spatially varying coefficients (generalized additive models, GAMs) to account for regional differences in responses to environment, much of which may have a genetic component (Wheeler & Waller, 2009; Wood, 2006). GAMs allow fitting of parameters that vary smoothly in space (i.e. parameter surfaces) and can thus capture spatially varying relationships between predictors and the response of interest. The spatially varying coefficients fit by GAM allow us to infer from the data where relationships between variables change, as opposed to binning data into a set of fixed (and possibly artificially defined) regions.

We selected climate variables based on knowledge of critical *Arabidopsis* developmental times and likely environmental stressors: average temperature in April, when warmth is expected to accelerate development (AprilMean in the models), minimum temperature in January, when vernalization cues are likely accumulating or when Mediterranean plants are in early growth (JanMinimum), and July aridity index (AI), when summer drought may be most likely (Fournier-Level et al., 2013; Hoffmann, 2002; Lasky et al., 2012; Wilczek, Cooper, Korves, & Schmitt, 2014). Our analyses are likely not highly sensitive to the exact calendar month chosen, given the high correlation in conditions between consecutive months (e.g. warm Aprils tend to be followed by warm Mays). Aridity index was calculated from July precipitation divided by July potential evapotranspiration (PET) (United Nations Environment Program, 1997). These climate gradients were generally not strongly correlated (July Aridity to April Mean Temperature  $r^2 = 0.09$ ; July Aridity to January Minimum Temperature  $r^2 = 0.003$ ; January Minimum Temperature to April Mean Temperature  $r^2 = 0.4$  by linear regression). We took temperature, precipitation, and PET values from the Climate Research Unit time series dataset, using values for the year of collection (New et al., 2000).

To assess how phenotypes have changed across the last few centuries (Question 3), we first tested a model with spatially-varying coefficients for the effect of year, allowing for geographic variation in temporal trends (hereafter, “year models”). The model also included spatially varying intercepts (SVI) to account for regional differences in long-term mean phenotypes. Year models included all specimens with phenotype data.

Next, to assess how temporal fluctuations in climate drive phenotypic change (Question 3), we fit models with the three climate covariates for a given year. We converted climate covariates to local anomalies by standardizing them relative to the entire time-series for a given grid cell to unit standard deviation and mean zero (“temporal models”). The model also included SVI to account for regional differences in long-term mean phenotypes. Temporal models only included

specimens from after 1900, when we had data on monthly climate from CRU. These models had the following structure

$$\text{Phenotype}_{ij} = \beta_1 \text{year}_{\text{dev}, ij} + \beta_2 \text{AI}_{\text{dev}, ij} + \beta_3 \text{JanMinimum}_{\text{dev}, ij} + \beta_4 \text{AprilMean}_{\text{dev}, ij} + \mu_j + \text{error}_{ij}.$$

In all models, the subscript  $j$  denotes location and  $i$  denotes year of collection. For the temporal model, the SVI is denoted by  $\mu_j$ , where the “ $j$ ” subscript indicates that the intercept varies with location. The errors are assumed to be independent, be normally distributed, and have constant variance.

Third, to study phenotypic responses to spatial gradients in long-term average climates (Question 2), we fit models with spatially varying coefficients for long-term, 50-year climate averages at each location (“spatial models”). We scaled these climate covariates and year of collection to unit standard deviation (Hijmans, Cameron, Parra, Jones, & Jarvis, 2005). In these models of responses to long-term average conditions, year of collection can be considered a nuisance variable. In spatial models, we used a single global intercept. Spatial models included specimens from all years with phenotype data.

$$\text{Phenotype}_{ij} = \beta_1 \text{year}_j + \beta_2 \text{AI}_j + \beta_3 \text{JanMinimum}_j + \beta_4 \text{AprilMean}_j + \mu + \text{error}_{ij}$$

Models were fit in R (version 3.5.0, R Core Team 2011) using the ‘gam’ function in package *mgcv* (version 1.8-17, Wood 2011). We allowed the model fitting to penalize covariates to 0 so that covariates weakly associated with phenotypes could be completely removed from the model; thus, using the *mgcv* package we can achieve model selection through joint penalization of multiple model terms. Coefficients in spatially varying coefficient models represent the relationship between each term and phenotype at each geographic point (indexed by  $j$  in our models), which we visualized by plotting the estimated coefficients on a map. Each cell in the 100x100 grid model rasters corresponded to 106 km East/West at the lowest latitude (28.16°) and 44km North/South (calculated using Vincenty ellipsoid distances in the *geosphere* package). Model predictions farther than 200km from a sampled accession were discarded when visualizing results.

We considered two other spatially-varying environmental variables of interest: elevation and N deposition. We left elevation and nitrogen deposition covariates out of the final models because inclusion resulted in instability in the numerical routines the GAM software (*mgcv*) used to estimate parameters and approximate Hessian matrices needed for confidence intervals. See supplemental material for more information on these covariates. Including only the variables of

the three climate covariates and year resulted in numerically stable estimates. In addition, scaling of year and climate variables tended to reduce the concavity of variables and increase stability.

Finally, we considered how traits co-vary (Question 1) by calculating the Pearson's correlation coefficients between traits and by Principal Components Analysis. We also fit GAMs with spatially varying intercepts allowing measured phenotypes as both response and predictor variables to observe how the correspondence of traits changes through space.

Code for all the models and plots will be included as a supplement and will be available on github.

## Results

### *Distribution of samples through time and space*

Samples were broadly distributed, with dense collections in Norway/Sweden, the Netherlands, and Spain (reflecting major herbaria used in the study), and sparser collections in the East (Figure 1). The earliest collection date we used was 1794, but a greater number of samples were available from the 1900s onwards.

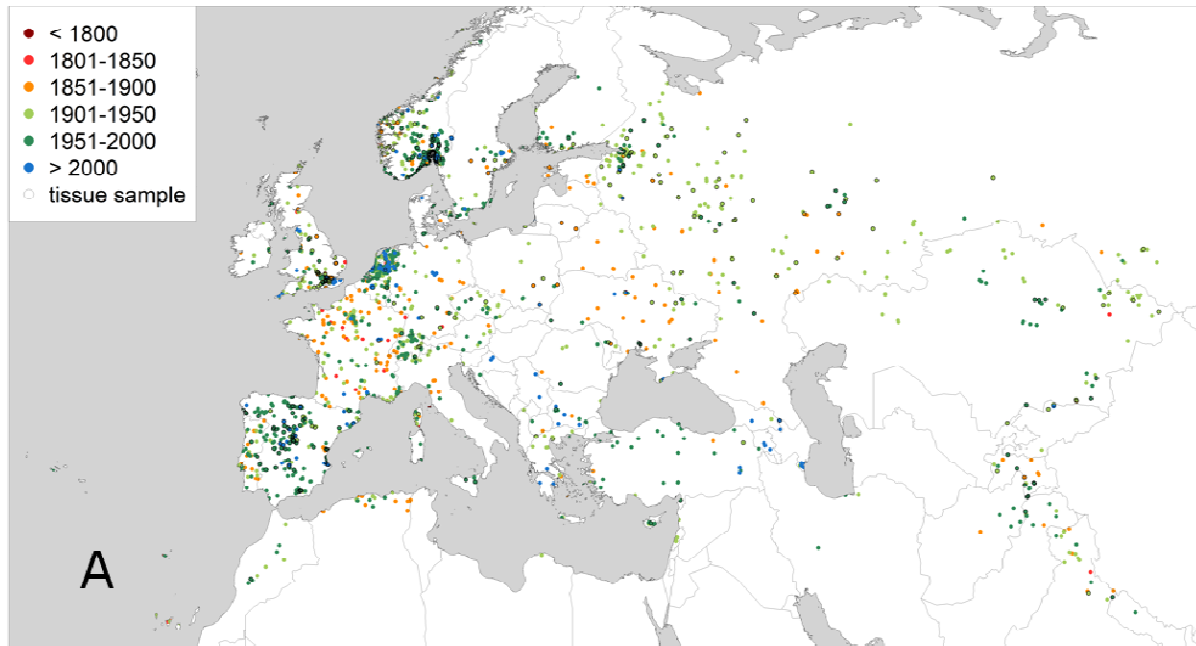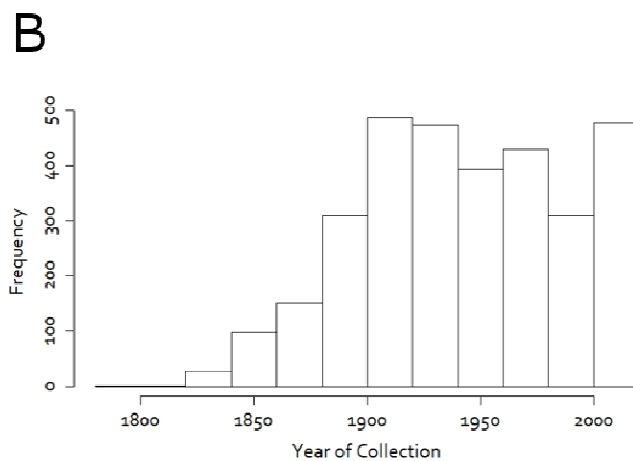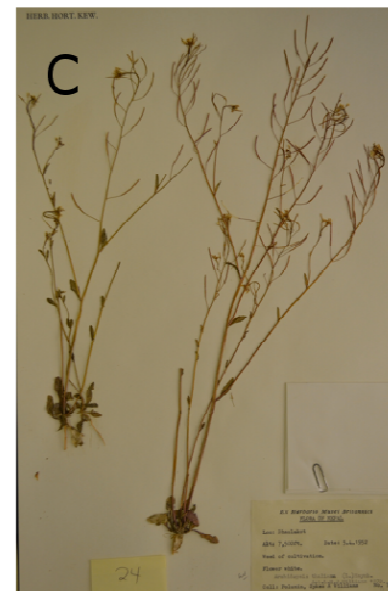



Figure 1: A) Locations of collections used in our analysis. Color of circle corresponds to year of collection. B) Distribution of years of collection. C) Sample herbarium record from Nepal on April 5, 1952, with a  $\Delta^{13}\text{C}$  of 21.9, a  $\delta^{15}\text{N}$  of 3.6, and a C:N ratio of 23.4.

### Correlations among phenotypes

We found generally weak correlations among phenotypes of *Arabidopsis* individuals (Question 1). The first two principal components explained only 36.3% and 24.1%, respectively, of the variance in the five phenotypes of  $\Delta^{13}\text{C}$ ,  $\delta^{15}\text{N}$ , date of collection, C:N, and PTU ( $N = 397$ ). The first principal component corresponded to a negative correlation between C:N versus day of collection (bivariate  $r = -0.194$ ) and PTU (bivariate  $r = -0.0972$ ). Inspecting the relationship between collection date and C:N further revealed a triangle shape (Figure 2B), i.e. there were no late-collected individuals with high C:N. ANOVA showed the slopes of the regression of the 25<sup>th</sup> and 75<sup>th</sup> percentiles to be significantly different, indicating that plants with the earliest collection dates show a different relationship to C:N than later collected plants ( $p = 0.002$ , Figure S18). In a GAM where C:N was a function of date or accumulated photothermal units, we found both measures of phenology were negatively correlated with C:N across the *Arabidopsis* native range, but this was insignificant at the 95% confidence interval when the effect of year of collection was included (Figure S20). The second PC corresponded to a negative correlation between  $\Delta^{13}\text{C}$  and  $\delta^{15}\text{N}$  (bivariate  $r = -0.218$ ). C:N and leaf proportion N are highly correlated (bivariate  $r = -0.815$ ), so we focus on C:N. See supplementary material for leaf N results.

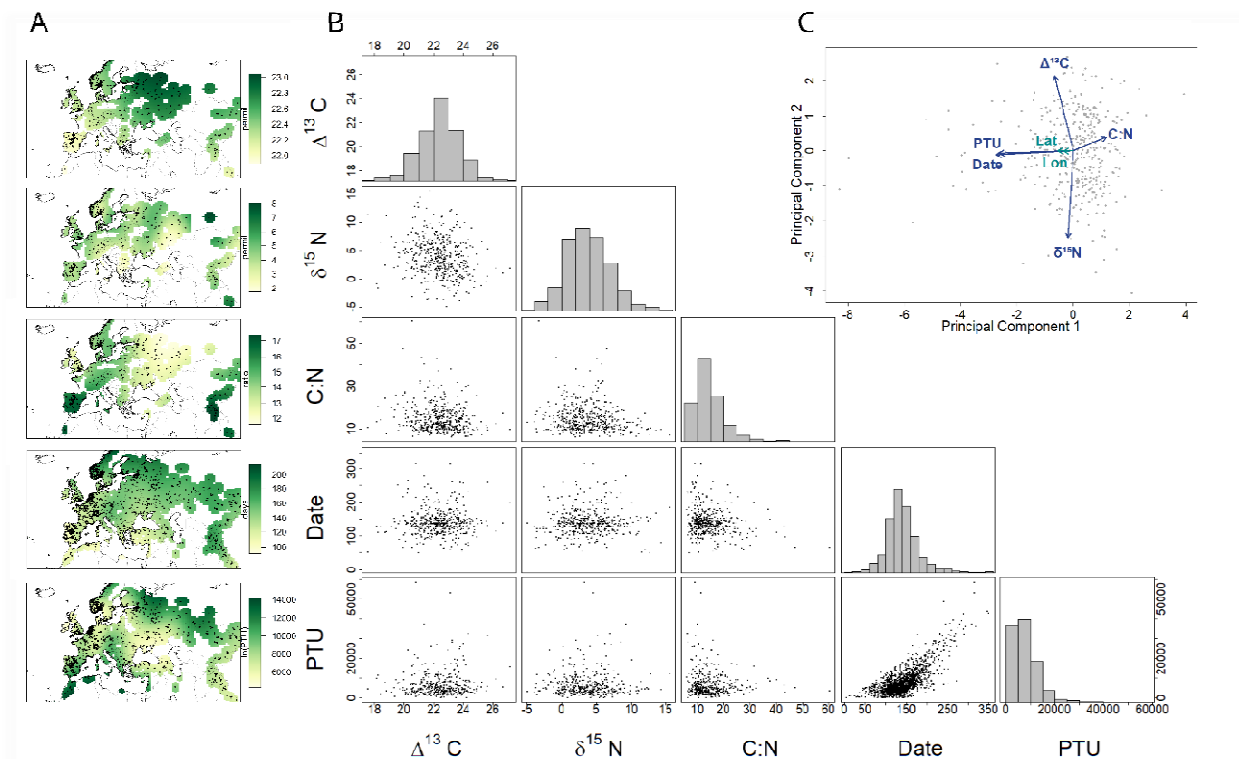

Figure 2: (A) Variation in phenotypes across the native range of *Arabidopsis* for  $\Delta^{13}\text{C}$ ,  $\delta^{15}\text{N}$ , C:N, collection date, and photothermal units (PTU) at collection. Color indicates the fitted mean value of the phenotype. Collection date is earlier in the southwest and Turkey in comparison to other regions; however, PTUs are higher in the southwest and in the northeast.  $\delta^{15}\text{N}$  is variable across the range. C:N shows a gradient of increasing to the southeast and southwest.  $\Delta^{13}\text{C}$  increases along a northeasterly gradient. (B) Correlations between phenotypes in this study. There is a positive trend between PTU and date of collection. PCA of phenotypes showed an inverse relationship between C:N and PTU and an inverse relationship between  $\Delta^{13}\text{C}$  and  $\delta^{15}\text{N}$  along the first and second principal components (C). Arrows represent correlation of phenotypes with principal components. Latitude (correlation with first PC  $r = -0.183$ ) and longitude (correlation with first PC  $r = -0.116$ ) correlations are shown for geographic context, though they were not included in PCA.

### *Spatial variation in long-term average phenotypes*

We visualized spatial diversity in phenotypes by plotting the intercept surfaces in the year only models (Figure 2A). All phenotypes showed significant spatial variation (all GAM smooth terms significantly different from zero).  $\Delta^{13}\text{C}$  was lower in the Iberian Peninsula and higher in Russia (GAM smooth term,  $p = 0.0002$ ).  $\delta^{15}\text{N}$  varied across the range, but with less pronounced spatial gradients (GAM smooth term,  $p = 0.003$ ). C:N was higher in the Iberian Peninsula and the East and lower in Russia (GAM smooth term,  $p = 8\text{e-}05$ ). Collection day was earlier along the Atlantic coast and Mediterranean (GAM smooth term,  $p = <2\text{e-}16$ ). Despite this, PTU at collection still was higher in the Mediterranean region as well as at far northern, continental sites (GAM smooth term,  $p = <2\text{e-}16$ ).

*Temporal change in phenotype*  
*S*

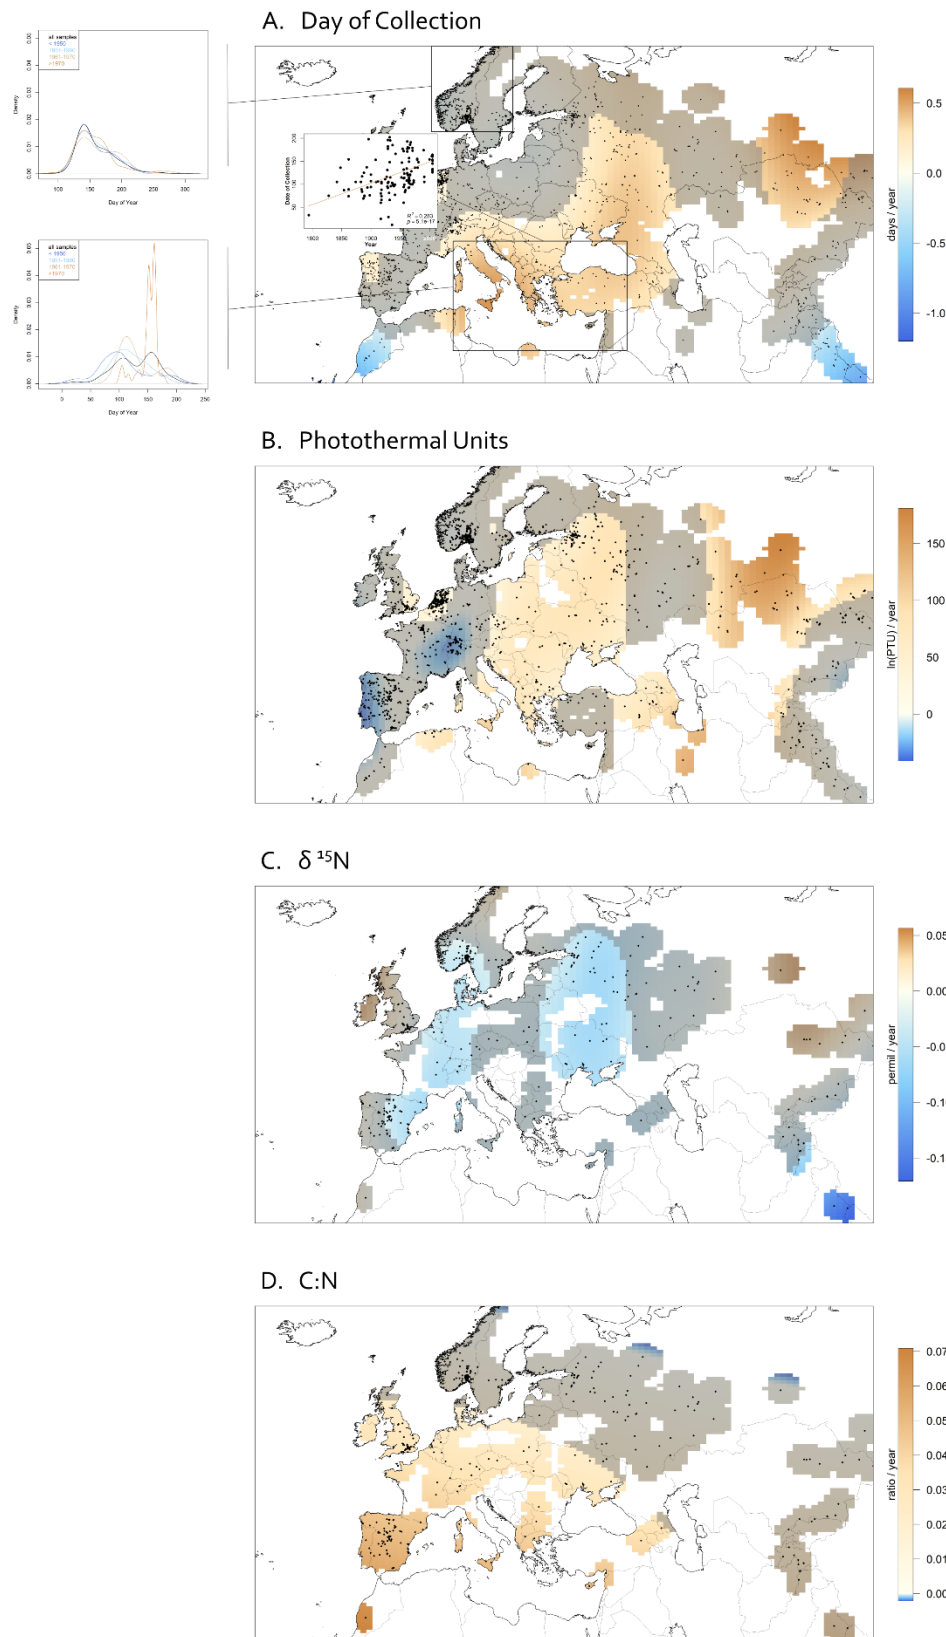

Figure 3: Change in phenotypes across years for collection date (A), photothermal units (B),  $\delta$  nitrogen (C), and C:N (D). Color indicates the value of the coefficient for year in the model excluding climate variables, gray shading indicates regions where estimated coefficient is not significantly different from 0. Day of collection and photothermal units have significantly increased over time in most of the range, but with some exceptions for day of collection in the south. Change in collection day was uneven across regions, with greater shifts in the Aegean than in the Scandinavian Peninsula.  $\delta^{15}\text{N}$  significantly decreased across most of the range, and C:N increased, most notably in the southwest. Inset scatterplot in A shows the significant increase in collection date with year for samples in the boxed Mediterranean region. Plots to the left of A show the density of collection dates through the year remains stable through time for Scandinavian collections within the boxed region (top) but shift toward more collections late in the year in the boxed Mediterranean collections (bottom).

Several phenotypes have changed significantly across large regions over the study period (1794-2010, Figure 3 above). For example, C:N ratio increased in later years in much of southwestern Europe.  $\delta^{15}\text{N}$  decreased significantly throughout most of the range. Collection date and PTUs became significantly later in many regions from the Mediterranean to Central Asia, although collection date became significantly earlier in the extreme south (Morocco and Himalayas). There was no significant temporal trend in  $\Delta^{13}\text{C}$  (not shown).

#### *Temporal change in phenotypes after accounting for climate anomalies*

The temporal trends in phenotypes across the study period were likely partly related to underlying climate variation. However, many of the phenotypes were still significantly associated with year of collection even when accounting for temporal anomalies in climate from 1901-2010. There was a general delay in collection through time in much of the eastern range (Figure S1, S2). However, Iberian collections were significantly earlier in later years. Across most of Europe, later years of collection also were associated with significantly greater C:N ratio (Figures S9, S10). Similarly, we observed  $\delta^{15}\text{N}$  decreasing in later years across much of Arabidopsis' range. There was still no significant temporal trend in  $\Delta^{13}\text{C}$ .

#### *Phenotype associations with spatiotemporal climate gradients*

**Date of collection** – In years (temporal models) with a relatively warm January or April plants were collected significantly earlier (Figure 4A). Similarly, in locations (spatial models) with

warmer temperatures plants were collected earlier, though in many regions these coefficients were non-significant. We also tested associations with July aridity index (precipitation/PET) and found that plants were collected significantly earlier in years (temporal models) with dry summers in central/eastern Europe, but later following dry summers in Central Asia (Figure 4B).

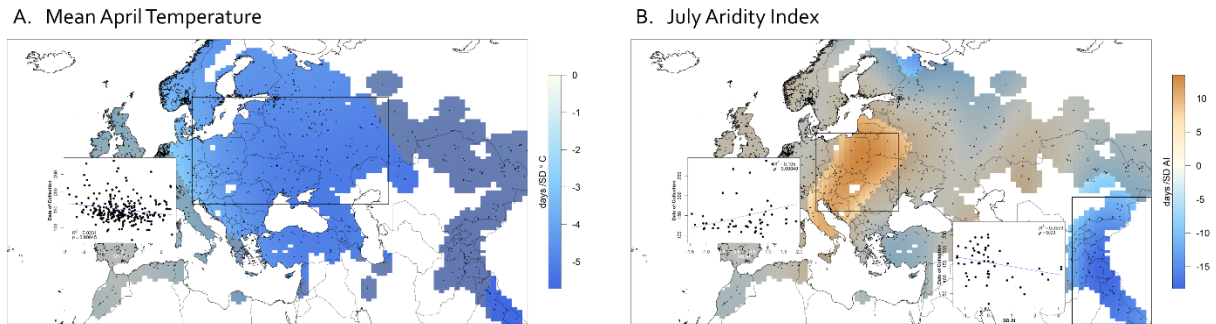

Figure 4: Association between collection day of *Arabidopsis* temporal mean April temperatures (A) and July aridity index (B) anomalies (compared to 50-year average). Color indicates the value of the coefficient of the April mean temperature or July aridity index term. In years where April was warmer, plants were collected earlier. In wetter years, plants were collected later in Eastern Europe but earlier in Asia. Shading indicates regions where estimated coefficient is not significantly different from 0. Scatterplots of phenotype measures for individuals within the boxed areas show a decreasing collection date with mean April temperature and increasing collection date with July aridity index in Eastern Europe and decreasing collection date in Central Asia.

**Photothermal units** – To standardize spatiotemporal variation in developmental periods, we also modeled climate associations with PTUs. There were few areas where temperature anomalies were significantly associated with PTUs (Figure S3). However, in some areas, accumulated PTUs at collection changed significantly in association with spatial temperature gradients (Figure S4). Locations with warmer Aprils had plants collected at more PTUs around the Baltic sea and fewer PTUs around the Aegean. In the temporal model, plants from Western Europe, the Aegean, and Central Asia were collected at lower PTUs in wetter years. In the spatial model, plants from wetter areas in the south were collected at lower PTUs, but this pattern was reversed in the North (Figure S3, S4).

**$\Delta^{13}\text{C}$  Carbon** – Wet summers were not significantly related to  $\Delta^{13}\text{C}$  in any region in either the temporal or spatial models. However, there was a significant change in the spatial relationship between  $\Delta^{13}\text{C}$  and long-term mean April temperature (smooth term significance:  $p = 2e-5$ ). Specifically, in Central Asia areas with warmer Aprils had higher  $\Delta^{13}\text{C}$  than collections from areas with cooler Aprils (Figure S6A), while in Iberia and Northeastern Europe, the reverse was

true (though the local relationships were not significant). Although elevation was not included in final models for reasons discussed above, replacing year with elevation in the temporal model showed a significant negative association between elevation and  $\Delta^{13}\text{C}$  (Figure S13).

**$\delta^{15}\text{Nitrogen}$**  –  $\delta^{15}\text{N}$  was significantly higher in wetter years in Iberia, Asia, and Central Europe, (Figure S7), but lower in the North of France. Temperature was only significantly positively related to  $\delta^{15}\text{N}$  in the case of spatial variation in minimum January temperatures around the North Sea.

**Leaf C:N** – Leaf C:N was significantly different among locations (spatial models) differing in April mean temperature and January minimum temperature, although the direction of these trends differed among regions. Specifically, sites with warmer winters were associated with higher C:N in southwestern Europe but lower C:N in central Asia (Figure S10B) and sites with warmer temperatures in April predicted lower C:N in Iberia. For the temporal model, plants collected in wetter years in Iberia had significantly higher C:N ratios.

#### *Comparison of results to hypotheses*

Table 2: Correspondence of hypothesized phenotype response to increases in temperature, rainfall, or year with observed model output.

Green boxes indicate that temporal or spatial models supported the hypothesis, with a significant relationship within the 95% confidence interval in the proposed direction. Red boxes indicate that temporal or spatial models were either insignificant or significant in the opposite direction to the predicted trend. Blue boxes indicate that the temporal or spatial models showed a high level of regional variation, with collections in some geographic areas supporting and others contradicting the hypothesis.

|                       | Temperature    | Rainfall | Year      |
|-----------------------|----------------|----------|-----------|
| $\Delta^{13}\text{C}$ | +              | +        | +         |
| $\delta^{15}\text{N}$ | +              | -        | -         |
| C:N                   | -              | -        | +         |
| Photothermal Units    | + or no change | +        | No change |
| Collection Date       | -              | +        | -         |



## Discussion

Widely distributed species often exhibit considerable phenotypic diversity, a large portion of which may be driven by adaptive plastic and evolutionary responses to environmental gradients. The existence of genetic variation in environmental responses among populations suggests that responses to temporal environmental shifts may differ dramatically among populations. Previous studies of intraspecific trait variation in response to environment have tended to focus on genetic variation of environmental responses in common gardens (*e.g.* Wilczek *et al.* 2009; Kenney *et al.* 2014), temporal trends in phenology from well-monitored sites (*e.g.* CaraDonna *et al.*, 2014), or field sampling of individuals from a small number of sites (*e.g.* Jung, Violle, Mondy, Hoffmann, & Muller, 2010). Here, we complement this literature by studying change in traits across an entire species range over two centuries, giving us a window into drivers of intraspecific diversity and regional differences in global change biology. From the accumulated work of field biologists contained in natural history collections, we tested hypotheses about variation in life history and physiology in response to environment. We observed modest evidence of coordinated phenological-physiological axes of variation. We found later flowering times and higher accumulated photothermal units over the study period across most of the range and lower  $\delta^{15}\text{N}$  and higher C:N in more recent collections. Additionally, we observed distinct regional differences in phenology,  $\Delta^{13}\text{C}$ , and C:N in response to rainfall and temperature.

### *Intraspecific variation in life history and physiology shows little coordination along a single major axis (question 1)*

We found little evidence for tight coordination among studied phenotypes, fitting with some past surveys that found weak to no support for a single major axis in intraspecific trait variation in response to environment across diverse plant growth forms (*e.g.* Albert *et al.* 2010; Wright & Sutton & Grier 2012). Common garden experiments often find substantial genetic covariation between the traits we studied possibly due to pleiotropy or selection maintaining correlated variation (Des Marais *et al.*, 2012; Kenney *et al.*, 2014; McKay *et al.*, 2003). By contrast, the massively complex environmental variation organisms experience in the wild may combine with genotype-by-environment interactions to generate high dimensional trait variation among individuals in nature.

Nevertheless, we found modest evidence of a life history-physiology axis: plants collected later in the year had low leaf C:N, indicative of a fast-growing resource acquisitive strategy with low investment in C for structure and high investment in N for photosynthesis. This strategy may be adaptive for rapid-cycling plants germinating and flowering within a season (spring/summer annuals), contrasted with slower-growing genotypes known to require vernalization for flowering over a winter annual habit. Indeed, Des Marais *et al.* (2012) found that vernalization-requiring (winter annual) *Arabidopsis* genotypes had lower leaf N than genotypes not requiring vernalization for flowering, the latter of which could also behave as spring or summer annuals.

The negative correlation we observed between  $\Delta^{13}\text{C}$  and  $\delta^{15}\text{N}$  has been reported by other authors and suggested to be a result of independent responses to multiple correlated environmental

variables rather than an intrinsic biological limitation. Environmental variables with opposing effects on  $\Delta^{13}\text{C}$  and  $\delta^{15}\text{N}$  include soil, temperature, and rainfall patterns (Hartman & Danin, 2010; Liu et al., 2007; Peri et al., 2012), due to depletion of soil N and changes in stomatal opening, and atmospheric carbon (Bloom, Burger, Asensio, & Cousins, 2010), which increases carbon uptake while suppressing nitrate assimilation.

*Arabidopsis life history and physiology vary across spatial environmental gradients, suggesting adaptive responses to long-term environmental conditions (question 2)*

Geographic clines in traits in nature may be due to adaptive responses to environment; however, the spatial differences in traits or trait changes through time we observed are difficult to ascribe to genetic or plastic causes because of unknown genotype-environment interactions in the field and the confounding of environmental gradients and population genetics. The 1001 Genomes Project identified genetic clusters of *Arabidopsis* that were somewhat geographically structured but noted that these clusters overlapped and were distributed across a wide range of environments (Alonso-Blanco et al., 2016) (see figure S21 for a map of the clusters). We observed patterns of significant phenotype-environment relationships that spanned multiple genetic clusters and that followed our expectations for how phenology could affect fitness, while physiological traits were less clear.

*Physiology, Leaf Economic Spectrum*

The Leaf Economic Spectrum and fast/slow life history predictions were not well supported by our results for C:N,  $\Delta^{13}\text{C}$ , and  $\delta^{15}\text{N}$  response to climate, since we saw both positive and negative trends with temperature and aridity depending on geographical region. This may be due to the intraspecific nature of our study, as opposed to the interspecific data often used to support the LES. In multispecies analyses, phenotype correlations with climate may be influenced by community composition changes across the environment or may not represent the physiology or climate responses of individual species (Albert et al., 2010; Elmore, Craine, Nelson, & Guinn, 2017). In addition, our study may have overlooked the effects of edaphic conditions on C:N and  $\delta^{15}\text{N}$ . C:N over most of the native range was insignificantly related to spatial and temporal gradients of temperature and aridity index (July precipitation/PET) but increased with year as seen in grassland communities due to rising  $C_a$  (Gill et al., 2002). Likewise,  $\delta^{15}\text{N}$  over most of the range neither decreased with aridity index nor responded to temperature as expected, but did decrease with year as previously reported in multi-species surveys (McLauchlan et al., 2010), possibly due to  $\text{CO}_2$  enrichment.

Similarly, we did not see strong relationships between aridity index and  $\Delta^{13}\text{C}$ .  $\Delta^{13}\text{C}$  was expected to be related to rainfall and temperature due to  $\Delta^{13}\text{C}$  being a proxy for stomatal gas exchange (Diefendorf et al., 2010; Farquhar et al., 1989). There are at least three potential explanations for weak  $\Delta^{13}\text{C}$  relationships with climate. First, we observed both positive and negative trends for aridity and date of collection, consistent with the hypothesis that *Arabidopsis*

exhibits both drought escaping and drought avoiding genotypes. The phenological response to moisture of rapid flowering (drought escape strategy) could confine growth to periods of high moisture, obviating any stomatal closure in response to soil drying (and hence no effect on  $\Delta^{13}\text{C}$ ). Stated simply, phenology and physiology cannot be treated as completely independent traits. Second, variation in plant traits we did not directly consider may affect  $\Delta^{13}\text{C}$ . Gas exchange and carbon assimilation depend in part on leaf architecture and physiology traits like venation, root allocation, and mesophyll conductance (Brodribb, Feild, & Jordan, 2007; Easlon et al., 2014; Schulze, Turner, Nicolle, & Schumacher, 2006), which could limit responses in  $\Delta^{13}\text{C}$ . For example, greater investment in roots could allow plants in relatively drier conditions to maintain open stomata, preventing decreases in  $C_i$  and leading to no observed climate effect on  $\Delta^{13}\text{C}$ . Third, elevated atmospheric partial  $\text{CO}_2$  could mitigate climate effects on  $\Delta^{13}\text{C}$  by increasing the efficiency of stomatal gas exchange (Drake et al., 2017). Local investigations of the patterns we found could complement our results by characterizing the underlying ecophysiological and life history mechanisms driving intraspecific variation. For example, local studies could allow more precise measurement of environmental conditions, and could remove some of the contribution of major genetic turnover among populations (including populations referred to as relicts, Alonso-Blanco et al., 2016), that may cause unexpected regional differences in phenotype trends (Figure S1D).

### *Phenology*

We found strong spatial gradients in two measures of phenology, suggesting that adaptive responses to climate drive long-term intraspecific phenotypic differences among regions. Locations that were warmer than average in either April or January corresponded to significantly earlier collection dates, consistent with temperature's positive effect on growth rate (Wilczek et al., 2009). In addition, our models provided support that some phenological variation did reflect seasonality of moisture availability. We found that *Arabidopsis* was collected significantly earlier in years with dry summers in central Europe and at significantly lower PTU in regions of wet summers around the Mediterranean, suggesting drought escape or avoidance strategies, respectively, could be important in those regions. Alternatively, later collections in wetter years could be the result of multiple successful generations due to the extra rainfall.

### *Changes in Arabidopsis life history and physiology over the last two centuries track climate, suggesting adaptive responses (question 3)*

Increasing global temperatures were expected to increase relative growth rate and hasten germination, decreasing flowering time as measured by collection date. In addition, atmospheric  $\text{CO}_2$  enrichment was expected to increase  $\Delta^{13}\text{C}$  (Drake et al., 2017) and C:N and decrease  $\delta^{15}\text{N}$  (Bloom et al., 2010). With increasing environmental nitrogen due to human activity (Galloway et al., 2004), we expected  $\delta^{15}\text{N}$  to decrease.

This is largely what we found in the year models for leaf physiology.  $\Delta^{13}\text{C}$  did not significantly change through time across the native range, which could be due to differential response to aridity gradients across the locations sampled (Drake et al., 2017). Geographic variation in the strength of the relationships for other traits could be due to underlying genetic variation or interaction with environmental factors we did not account for. Nevertheless, C:N increases and  $\delta^{15}\text{N}$  decreases as expected across large portions of the native range.

For collection date and PTU, however, our models returned the surprising result of later collection rather than earlier, despite earlier collections in warmer years. The fact that the relationship between warmth and collection date was spatially variable, and insignificant in some regions, may indicate areas of contrasting phenological response, perhaps due to lost vernalization signal or variable effects on germination (Burghardt, Edwards, & Donohue, 2016). Variation across space in phenological response to climate change has been shown before and may be due to genetic differences among populations or due to interactions with other environmental variables (Park et al., 2018). Alternatively, *Arabidopsis* is known to complete a generation within a single season, climate permitting, and warmer climates may allow for fall flowering (Fournier-Level et al., 2013; Wilczek et al., 2009). If warmer temperatures enable a greater number of spring or summer germinants to flower before winter in regions such as Central Europe, we would expect to see later collection dates in more recent years (Burghardt et al., 2015). In this case, regions that have earlier collection dates with warmer temperature may be limited in generational cycles due to another environmental factor, such as summer drought or short growing seasons.

Our findings of later collection dates through the study period (1798-2010) may surprise some readers due to previously observed acceleration of temperate spring phenology (Parmesan & Yohe, 2003). However, we modeled changes in mean phenological response to environment, which can be weakly related to either tail of phenology trait distributions (CaraDonna et al., 2014). Individuals on the extremes, such as first-flowering individuals, are often the primary focus of studies showing accelerated spring phenology in recent years. Why might *Arabidopsis* flower later even as global temperatures rise? First, non-climate environmental changes (*e.g.* shifts in land use toward human-dominated landscapes) may drive phenology by favoring spring germinants. Second, warming climate or increasing atmospheric  $\text{pCO}_2$  may favor alternate life histories by increasing relative growth rate, thus allowing spring or fall germinants to complete their life cycle before conditions degrade at the end of a growing season. Later collections in more recent years might represent an increasing proportion of fast-growing spring or summer annuals as opposed to winter annuals. Whatever the cause of *Arabidopsis* flowering later, these phenological changes may have important ecological effects, such as altered biotic interactions.

### *Our approach, technical limitations in herbaria data to surmount in future studies*

Understanding how environmental variation drives the intraspecific diversity in broadly distributed species has been challenging due to logistics of large spatiotemporal scales. However,

advances in digitization of museum specimens and the generation of global gridded spatiotemporal environmental data are opening a new window into large scale patterns of biodiversity. One challenge of herbarium specimens is that they typically present a single observation of a mature, reproductive individuals. Thus, these specimens contain limited information on phenology and physiology at earlier life stages (*e.g.* seedling plants), which can have subsequently strong impacts on later observed stages. Use of developmental models (Burghardt et al., 2015) might allow one to backcast potential developmental trajectories using herbarium specimens and climate data, to make predictions about phenology of germination and transition to flowering. In addition, herbaria collections are often biased by factors such as geography, species, and climate (Daru et al., 2018; Loiselle et al., 2008). Hierarchical sampling through repeated collections in the same region could improve the confidence of our model in representing phenotypic change through time.

Generalized additive models are a flexible approach to model phenotype responses to environment that might differ spatially among populations (MacGillivray et al., 2010). These models allow the data to inform on spatial variation in the trends studied, unlike approaches that bin individuals into discrete and arbitrarily bounded regions. Herbarium records represent imperfect and biased samples of natural populations (Daru et al., 2018), and future efforts may benefit from additional information that might allow us to account for these biases. Here, we sampled a very large number of specimens across continents and centuries, perhaps reducing the effect of biases associated with specific collectors. Nevertheless, as museum informatics advance it may become possible to explicitly model potential sources of bias, for example those arising from collecting behavior of specific researchers.

### *Conclusion*

Widely distributed species often harbor extensive intraspecific trait diversity. Natural history collections offer a window into this diversity and in particular allow investigation of long-term responses to anthropogenic change across species ranges. Here we show that spatiotemporal climate gradients explain much of this diversity but nevertheless much of the phenotypic diversity in nature remains to be explained.

### **Acknowledgements**

Hundreds of botanists collected the specimens studied here. The staff at herbaria at Oslo Natural History Museum, Kew Gardens, Real Jardin Botanico, Komarov Botanical Garden, the New York Botanical Garden, and the British Museum of Natural History gave permission for tissue sampling. Michelle Brown provided essential assistance in collecting herbarium tissue. Jason Bonnette helped coordinate sample preparation. Major assistance in digitizing of specimens was provided by Patrick Herné. Eugene Shakirov aided in translating Russian specimen labels. Data from the MNHN in Paris were obtained thanks to the participatory science program Les

Herbonautes" (MNHN/Tela Botanica) which is part of Infrastructure Nationale e-RECOLNAT: ANR-11-INBS-0004. Additional volunteers from the Atlas of Living Australia helped with digitization and georeferencing. Funding was provided by an Earth Institute fellowship to JRL.

The authors report no commercial or other relationships relevant to the content of this article that would represent a conflict of interest.



## References

- Albert, C. H., Thuiller, W., Yoccoz, N. G., Soudant, A., Boucher, F., Saccone, P., & Lavorel, S. (2010). Intraspecific functional variability: extent, structure and sources of variation. *Journal of Ecology*, 98(3), 604–613. <http://doi.org/10.1111/j.1365-2745.2010.01651.x>
- Alonso-Blanco, C., Andrade, J., Becker, C., Bemm, F., Bergelson, J., Borgwardt, K. M. M., ... Zhou, X. (2016). 1,135 genomes reveal the global pattern of polymorphism in *Arabidopsis thaliana*. *Cell*, 166(2), 481–491. <http://doi.org/10.1016/j.cell.2016.05.063>
- Amundson, R., Austin, A. T., Schuur, E. A. G., Yoo, K., Matzek, V., Kendall, C., ... Baisden, W. T. (2003). Global patterns of the isotopic composition of soil and plant nitrogen. *Global Biogeochemical Cycles*, 17(1).
- Anderegg, L. D. L., Berner, L. T., Badgley, G., Sethi, M. L., Law, B. E., & HilleRisLambers, J. (2018). Within-species patterns challenge our understanding of the leaf economics spectrum. *Ecology Letters*. <http://doi.org/10.1111/ele.12945>
- BassiriRad, H., Constable, J. V. H., Lussenhop, J., Kimball, B. A., Norbys, R. J., Oechel, W. C., ... Silim, S. (2003). Widespread foliage  $\delta^{15}\text{N}$  depletion under elevated  $\text{CO}_2$ : Inferences for the nitrogen cycle. *Global Change Biology*. <http://doi.org/10.1046/j.1365-2486.2003.00679.x>
- Blonder, B., Violle, C., Bentley, L. P., & Enquist, B. J. (2011). Venation networks and the origin of the leaf economics spectrum. *Ecology Letters*, 14(2), 91–100. <http://doi.org/10.1111/j.1461-0248.2010.01554.x>
- Bloom, A. J., Burger, M., Asensio, J. S. R., & Cousins, A. B. (2010). Carbon dioxide enrichment inhibits nitrate assimilation in wheat and arabidopsis. *Science*. <http://doi.org/10.1126/science.1186440>
- Both, C., Artemyev, A. V., Blaauw, B., Cowie, R. J., Dekhuijzen, A. J., Eeva, T., ... Visser, M. E. (2004). Large-scale geographical variation confirms that climate change causes birds to lay earlier. *Proceedings of the Royal Society B: Biological Sciences*, 271(1549), 1657–1662. <http://doi.org/10.1098/rspb.2004.2770>
- Brachi, B., Faure, N., Horton, M., Flahauw, E., Vazquez, A., Nordborg, M., ... Roux, F. (2010). Linkage and association mapping of *Arabidopsis thaliana* flowering time in nature. *PLoS Genetics*, 6(5), 40. <http://doi.org/10.1371/journal.pgen.1000940>
- Bradshaw, A. D. (1965). Evolutionary significance of phenotypic plasticity in plants. *Advances in Genetics*. [http://doi.org/10.1016/S0065-2660\(08\)60048-6](http://doi.org/10.1016/S0065-2660(08)60048-6)
- Brodribb, T. J., Feild, T. S., & Jordan, G. J. (2007). Leaf maximum photosynthetic rate and venation are linked by hydraulics. *Plant Physiology*, 144(4), 1890–1898. <http://doi.org/10.1104/pp.107.101352>
- Burghardt, L. T., Edwards, B. R., & Donohue, K. (2016). Multiple paths to similar germination behavior in *Arabidopsis thaliana*. *New Phytologist*, 209(3), 1301–1312. <http://doi.org/10.1111/nph.13685>
- Burghardt, L. T., Metcalf, C. J. E., Wilczek, A. M., Schmitt, J., & Donohue, K. (2015). Modeling

- the influence of genetic and environmental variation on the expression of plant life cycles across landscapes. *The American Naturalist*, 185(2), 212–227.
- CaraDonna, P. J., Iler, A. M., & Inouye, D. W. (2014). Shifts in flowering phenology reshape a subalpine plant community. *Proceedings of the National Academy of Sciences*, 111(13), 4916–4921. <http://doi.org/10.1073/pnas.1323073111>
- Chardon, F., Barthélémy, J., Daniel-Vedele, F., & Masclaux-Daubresse, C. (2010). Natural variation of nitrate uptake and nitrogen use efficiency in *Arabidopsis thaliana* cultivated with limiting and ample nitrogen supply. *Journal of Experimental Botany*, 61(9), 2293–2302. <http://doi.org/10.1093/jxb/erq059>
- Craine, J. M., Elmore, A. J., Aida, M. P. M., Bustamante, M., Dawson, T. E., Hobbie, E. A., ... Wright, I. J. (2009). Global patterns of foliar nitrogen isotopes and their relationships with climate, mycorrhizal fungi, foliar nutrient concentrations, and nitrogen availability. *New Phytologist*, 183(4), 980–992. <http://doi.org/10.1111/j.1469-8137.2009.02917.x>
- Daru, B. H., Park, D. S., Primack, R. B., Willis, C. G., Barrington, D. S., Whitfeld, T. J. S., ... Davis, C. C. (2018). Widespread sampling biases in herbaria revealed from large-scale digitization. *New Phytologist*. <http://doi.org/10.1111/nph.14855>
- Davis, C. C., Willis, C. G., Connolly, B., Kelly, C., & Ellison, A. M. (2015). Herbarium records are reliable sources of phenological change driven by climate and provide novel insights into species' phenological cueing mechanisms. *American Journal of Botany*, 102(10), 1599–1609. <http://doi.org/10.3732/ajb.1500237>
- Des Marais, D. L., McKay, J. K., Richards, J. H., Sen, S., Wayne, T., & Juenger, T. E. (2012). Physiological genomics of response to soil drying in diverse *Arabidopsis* accessions. *The Plant Cell*. <http://doi.org/10.1105/tpc.112.096180>
- Diefendorf, A. F., Mueller, K. E., Wing, S. L., Koch, P. L., & Freeman, K. H. (2010). Global patterns in leaf <sup>13</sup>C discrimination and implications for studies of past and future climate. *Proceedings of the National Academy of Sciences*, 107(13), 5738–5743. <http://doi.org/10.1073/pnas.0910513107>
- Drake, B. L., Hanson, D. T., Lowrey, T. K., & Sharp, Z. D. (2017). The carbon fertilization effect over a century of anthropogenic CO<sub>2</sub> emissions: higher intracellular CO<sub>2</sub> and more drought resistance among invasive and native grass species contrasts with increased water use efficiency for woody plant. *Global Change Biology*, 23(2), 782–792. <http://doi.org/10.1111/gcb.13449>
- Easlon, H. M., Nemali, K. S., Richards, J. H., Hanson, D. T., Juenger, T. E., & McKay, J. K. (2014). The physiological basis for genetic variation in water use efficiency and carbon isotope composition in *Arabidopsis thaliana*. *Photosynthesis Research*, 119(1–2), 119–129.
- Elmore, A. J., Craine, J. M., Nelson, D. M., & Guinn, S. M. (2017). Continental scale variability of foliar nitrogen and carbon isotopes in *Populus balsamifera* and their relationships with climate. *Scientific Reports*, 7(1). <http://doi.org/10.1038/s41598-017-08156-x>
- Evans, J. R. (1989). Photosynthesis and nitrogen relationships in leaves of C3 plants. *Oecologia*, 78(1), 9–19.

- Exposito-Alonso, M., Vasseur, F., Ding, W., Wang, G., Burbano, H. A., & Weigel, D. (2018). Genomic basis and evolutionary potential for extreme drought adaptation in *Arabidopsis thaliana*. *Nature Ecology and Evolution*. <http://doi.org/10.1038/s41559-017-0423-0>
- Farquhar, G., Ehleringer, J., & Hubick, K. (1989). Carbon isotope discrimination and photosynthesis. *Annual Review of Plant Physiology and Plant Molecular Biology*, 40(1), 503–537. <http://doi.org/10.1146/annurev.pp.40.060189.002443>
- Farquhar, G., O’Leary, M., & Berry, J. (1982). On the relationship between carbon isotope discrimination and the intercellular carbon dioxide concentration in leaves. *Australian Journal of Plant Physiology*, 9(2), 121–137. <http://doi.org/10.1071/PP9820121>
- Fournier-Level, A., Wilczek, A. M., Cooper, M. D., Roe, J. L., Anderson, J., Eaton, D., ... Schmitt, J. (2013). Paths to selection on life history loci in different natural environments across the native range of *Arabidopsis thaliana*. *Molecular Ecology*, 22(13), 3552–3566. <http://doi.org/10.1111/mec.12285>
- Galloway, J. N., Dentener, F. J., Capone, D. G., Boyer, E. W., Howarth, R. W., Seitzinger, S. P., ... Holland, E. A. (2004). Nitrogen cycles: past, present, and future. *Biogeochemistry*, 70(2), 153–226.
- Gill, R. A., Polley, H. W., Johnson, H. B., Anderson, L. J., Maherali, H., & Jackson, R. B. (2002). Nonlinear grassland responses to past and future atmospheric CO<sub>2</sub>. *Nature*. <http://doi.org/10.1038/417279a>
- Hartman, G., & Danin, A. (2010). Isotopic values of plants in relation to water availability in the Eastern Mediterranean region. *Oecologia*. <http://doi.org/10.1007/s00442-009-1514-7>
- Henn, J. J., Buzzard, V., Enquist, B. J., Halbritter, A. H., Klanderud, K., Maitner, B. S., ... Vandvik, V. (2018). Intraspecific trait variation and phenotypic plasticity mediate alpine plant species response to climate change. *Frontiers in Plant Science*. <http://doi.org/10.3389/fpls.2018.01548>
- Hijmans, R. J. (2017). geosphere: spherical trigonometry. Retrieved from <https://cran.r-project.org/package=geosphere>
- Hijmans, R. J., Cameron, S. E., Parra, J. L., Jones, P. G., & Jarvis, A. (2005). Very high resolution interpolated climate surfaces for global land areas. *International Journal of Climatology*, 25(15), 1965–1978.
- Hoffmann, M. H. (2002). Biogeography of *Arabidopsis thaliana* (L.) Heynh. (Brassicaceae). *Journal of Biogeography*, 29(1), 125–134. <http://doi.org/10.1046/j.1365-2699.2002.00647.x>
- Hu, Y.-K., Pan, X., Liu, G.-F., Li, W.-B., Dai, W.-H., Tang, S.-L., ... Dong, M. (2015). Novel evidence for within-species leaf economics spectrum at multiple spatial scales. *Frontiers in Plant Science*. <http://doi.org/10.3389/fpls.2015.00901>
- Joshi, J., Schmid, B., Caldeira, M. C., Dimitrakopoulos, P. G., Good, J., Harris, R., ... Lawton, J. H. (2001). Local adaptation enhances performance of common plant species. *Ecology Letters*. <http://doi.org/10.1046/j.1461-0248.2001.00262.x>
- Jung, V., Violle, C., Mondy, C., Hoffmann, L., & Muller, S. (2010). Intraspecific variability and

- trait-based community assembly. *Journal of Ecology*, 98(5), 1134–1140.  
<http://doi.org/10.1111/j.1365-2745.2010.01687.x>
- Kenney, A. M., McKay, J. K., Richards, J. H., & Juenger, T. E. (2014). Direct and indirect selection on flowering time, water-use efficiency (WUE,  $\delta^{13}\text{C}$ ), and WUE plasticity to drought in *Arabidopsis thaliana*. *Ecology and Evolution*, 4(23), 4505–4521.  
<http://doi.org/10.1002/ece3.1270>
- Lang, P. L. M., Willems, F. M., Scheepens, J. F., Burbano, H. A., & Bossdorf, O. (2018). Using herbaria to study global environmental change. *New Phytologist*.  
<http://doi.org/10.1111/nph.15401>
- Lasky, J. R., Des Marais, D. L., McKay, J. K., Richards, J. H., Juenger, T. E., & Keitt, T. H. (2012). Characterizing genomic variation of *Arabidopsis thaliana*: the roles of geography and climate. *Molecular Ecology*, 21(22), 5512–5529. <http://doi.org/10.1111/j.1365-294X.2012.05709.x>
- Lasky, J. R., Forester, B. R., & Reimherr, M. (2018). Coherent synthesis of genomic associations with phenotypes and home environments. *Molecular Ecology Resources*, 18(1), 91–106.
- Leimu, R., & Fischer, M. (2008). A meta-analysis of local adaptation in plants. *PLoS ONE*.  
<http://doi.org/10.1371/journal.pone.0004010>
- Linhart, Y. B., & Grant, M. C. (2002). Evolutionary significance of local genetic differentiation in plants. *Annual Review of Ecology and Systematics*.  
<http://doi.org/10.1146/annurev.ecolsys.27.1.237>
- Liu, X., Zhao, L., Gasaw, M., Gao, D., Qin, D., & Ren, J. (2007). Foliar  $\delta^{13}\text{C}$  and  $\delta^{15}\text{N}$  values of C3 plants in the Ethiopia Rift Valley and their environmental controls. *Chinese Science Bulletin*. <http://doi.org/10.1007/s11434-007-0165-5>
- Loiselle, B. A., Jørgensen, P. M., Consiglio, T., Jiménez, I., Blake, J. G., Lohmann, L. G., & Montiel, O. M. (2008). Predicting species distributions from herbarium collections: Does climate bias in collection sampling influence model outcomes? *Journal of Biogeography*.  
<http://doi.org/10.1111/j.1365-2699.2007.01779.x>
- Lovell, J. T., Juenger, T. E., Michaels, S. D., Lasky, J. R., Platt, A., Richards, J. H., ... McKay, J. K. (2013). Pleiotropy of FRIGIDA enhances the potential for multivariate adaptation. *Proceedings of the Royal Society B: Biological Sciences*.  
<http://doi.org/10.1098/rspb.2013.1043>
- Ludlow, M. M. (1989). Strategies of response to water stress. In K. H. Kreeb, H. Richter, & T. M. Hinckley (Eds.), *Structural and functional responses to environmental stresses: water shortage* (pp. 269–281). Berlin: SPB Academic Publishers.
- MacGillivray, F., Hudson, I. L., & Lowe, A. J. (2010). Herbarium collections and photographic images: Alternative data sources for phenological research. In *Phenological Research: Methods for Environmental and Climate Change Analysis* (pp. 425–461). Dordrecht: Springer Netherlands. [http://doi.org/10.1007/978-90-481-3335-2\\_19](http://doi.org/10.1007/978-90-481-3335-2_19)
- Matesanz, S., Gianoli, E., & Valladares, F. (2010). Global change and the evolution of phenotypic plasticity in plants. *Annals of the New York Academy of Sciences*.

<http://doi.org/10.1111/j.1749-6632.2010.05704.x>

- McCarroll, D., & Loader, N. J. (2004). Stable isotopes in tree rings. *Quaternary Science Reviews*, 23(7–8), 771–801.
- McKay, J. K., Richards, J. H., & Mitchell-Olds, T. (2003). Genetics of drought adaptation in *Arabidopsis thaliana*: I. Pleiotropy contributes to genetic correlations among ecological traits. *Molecular Ecology*. <http://doi.org/10.1046/j.1365-294X.2003.01833.x>
- McLauchlan, K. K., Ferguson, C. J., Wilson, I. E., Ocheltree, T. W., & Craine, J. M. (2010). Thirteen decades of foliar isotopes indicate declining nitrogen availability in central North American grasslands. *New Phytologist*, 187(4), 1135–1145. <http://doi.org/10.1111/j.1469-8137.2010.03322.x>
- Menzel, A., Sparks, T. H., Estrella, N., Koch, E., Aaasa, A., Ahas, R., ... Zust, A. (2006). European phenological response to climate change matches the warming pattern. *Global Change Biology*. <http://doi.org/10.1111/j.1365-2486.2006.01193.x>
- Miller-Rushing, A. J., Primack, R. B., Primack, D., & Mukunda, S. (2006). Photographs and herbarium specimens as tools to document phenological changes in response to global warming. *American Journal of Botany*, 93(11), 1667–1674. <http://doi.org/10.3732/ajb.93.11.1667>
- New, M., Hulme, M., & Jones, P. (2000). Representing twentieth-century space-time climate variability. Part II: Development of 1901–96 monthly grids of terrestrial surface climate. *Journal of Climate*, 13(13), 2217–2238. [http://doi.org/10.1175/1520-0442\(2000\)013<2217:RTCSTC>2.0.CO;2](http://doi.org/10.1175/1520-0442(2000)013<2217:RTCSTC>2.0.CO;2)
- Nienhuis, J., Sills, G. R., Martin, B., & King, G. (1994). Variance for water-use efficiency among ecotypes and recombinant inbred lines of *Arabidopsis thaliana* (Brassicaceae). *American Journal of Botany*, 81(8), 943–947. <http://doi.org/10.2307/2445286>
- Ordoñez, J. C., Van Bodegom, P. M., Witte, J. P. M., Wright, I. J., Reich, P. B., & Aerts, R. (2009). A global study of relationships between leaf traits, climate and soil measures of nutrient fertility. *Global Ecology and Biogeography*, 18(2), 137–149. <http://doi.org/10.1111/j.1466-8238.2008.00441.x>
- Pardo, L. H., McNulty, S. G., Boggs, J. L., & Duke, S. (2007). Regional patterns in foliar <sup>15</sup>N across a gradient of nitrogen deposition in the northeastern US. *Environmental Pollution*, 149(3), 293–302. <http://doi.org/10.1016/j.envpol.2007.05.030>
- Park, D. S., Breckheimer, I., Williams, A. C., Law, E., Ellison, A. M., & Davis, C. C. (2018). Herbarium specimens reveal substantial and unexpected variation in phenological sensitivity across the eastern United States. *Philosophical Transactions of the Royal Society of London. Series B, Biological Sciences*. <http://doi.org/10.1098/rstb.2017.0394>
- Parmesan, C., & Yohe, G. (2003). A globally coherent fingerprint of climate change impacts across natural systems. *Nature*, 421(6918), 37–42. <http://doi.org/10.1038/nature01286>
- Peñuelas, J., Filella, I., Zhang, X., Llorens, L., Ogaya, R., Lloret, F., ... Terradas, J. (2004). Complex spatiotemporal phenological shifts as a response to rainfall changes. *New Phytologist*. <http://doi.org/10.1111/j.1469-8137.2004.01003.x>



- Peri, P. L., Ladd, B., Pepper, D. A., Bonser, S. P., Laffan, S. W., & Amelung, W. (2012). Carbon ( $\delta^{13}\text{C}$ ) and nitrogen ( $\delta^{15}\text{N}$ ) stable isotope composition in plant and soil in Southern Patagonia's native forests. *Global Change Biology*. <http://doi.org/10.1111/j.1365-2486.2011.02494.x>
- R Core Team. (2018). R: a language and environment for statistical computing. Vienna, Austria. <http://doi.org/10.1007/978-3-540-74686-7>
- Rachmilevitch, S., Cousins, A. B., & Bloom, A. J. (2004). Nitrate assimilation in plant shoots depends on photorespiration. *Proceedings of the National Academy of Sciences*, *101*(31), 11506–11510. <http://doi.org/10.1073/pnas.0404388101>
- Reich, P. B. (2014). The world-wide “fast-slow” plant economics spectrum: a traits manifesto. *Journal of Ecology*, *102*(2), 275–301. <http://doi.org/10.1111/1365-2745.12211>
- Reich, P. B., Hungate, B. A., & Luo, Y. (2006). Carbon-nitrogen interactions in terrestrial ecosystems in response to rising atmospheric carbon dioxide. *Annual Review of Ecology, Evolution, and Systematics*, *37*(1), 611–636. <http://doi.org/10.1146/annurev.ecolsys.37.091305.110039>
- Reich, P. B., & Oleksyn, J. (2004). Global patterns of plant leaf N and P in relation to temperature and latitude. *Proceedings of the National Academy of Sciences*, *101*(30), 11001–11006. <http://doi.org/10.1073/pnas.0403588101>
- Reich, P. B., Wright, I. J., Cavender-Bares, J., Craine, J. M., Oleksyn, J., Westoby, M., & Walters, M. B. (2003). The evolution of plant functional variation: traits, spectra, and strategies. *International Journal of Plant Sciences*, *164*(S3), S143–S164. <http://doi.org/10.1086/374368>
- Sack, L., Scoffoni, C., McKown, A. D., Frole, K., Rawls, M., Havran, J. C., ... Tran, T. (2012). Developmentally based scaling of leaf venation architecture explains global ecological patterns. *Nature Communications*, *3*, 837. <http://doi.org/10.1038/ncomms1835>
- Sartori, K. F. R., Vasseur, F., Violle, C., Baron, E., Gerard, M., Rowe, N., ... Masclef, D. (2018). Leaf economics guides slow-fast adaptation across the geographic range of *A. thaliana*. *BioRxiv*, 487066.
- Schulze, E. D., Turner, N. C., Nicolle, D., & Schumacher, J. (2006). Leaf and wood carbon isotope ratios, specific leaf areas and wood growth of *Eucalyptus* species across a rainfall gradient in Australia. *Tree Physiology*, *26*(4), 479–492. <http://doi.org/10.1093/treephys/26.4.479>
- Seibt, U., Rajabi, A., Griffiths, H., & Berry, J. A. (2008). Carbon isotopes and water use efficiency: Sense and sensitivity. *Oecologia*. <http://doi.org/10.1007/s00442-007-0932-7>
- Sparks, T. H., & Carey, P. D. (2006). The Responses of Species to Climate Over Two Centuries: An Analysis of the Marham Phenological Record, 1736-1947. *The Journal of Ecology*. <http://doi.org/10.2307/2261570>
- Stock, W. D., & Evans, J. R. (2006). Effects of water availability, nitrogen supply and atmospheric CO<sub>2</sub> concentrations on plant nitrogen natural abundance values. *Functional Plant Biology*, *33*(3), 219–227. <http://doi.org/10.1071/FP05188>



- Stocking, C. R., & Ongun, A. (1962). The intracellular distribution of some metallic elements in leaves. *American Journal of Botany*, 49(3), 284–289.
- Turesson, G. (1922). The genotypical response of the plant species to the habitat. *Hereditas*. <http://doi.org/10.1111/j.1601-5223.1922.tb02734.x>
- United Nations Environment Program. (1997). *World atlas of desertification*. (N. Middleton & D. Thomas, Eds.) (2nd ed.).
- Wheeler, D. C., & Waller, L. A. (2009). Comparing spatially varying coefficient models: a case study examining violent crime rates and their relationships to alcohol outlets and illegal drug arrests. *Journal of Geographical Systems*, 11(1), 1–22. <http://doi.org/10.1007/s10109-008-0073-5>
- Wilczek, A. M., Cooper, M. D., Korves, T. M., & Schmitt, J. (2014). Lagging adaptation to warming climate in *Arabidopsis thaliana*. *Proceedings of the National Academy of Sciences*, 111(22), 7906–7913. <http://doi.org/10.1073/pnas.1406314111>
- Wilczek, A. M., Roe, J. L., Knapp, M. C., Cooper, M. D., Lopez-Gallego, C., Martin, L. J., ... Schmitt, J. (2009). Effects of genetic perturbation on seasonal life history plasticity. *Science*, 323(5916), 930–934. <http://doi.org/10.1126/science.1165826>
- Willis, C. G., Ellwood, E. R., Primack, R. B., Davis, C. C., Pearson, K. D., Gallinat, A. S., ... Soltis, P. S. (2017). Old plants, new tricks: phenological research using herbarium specimens. *Trends in Ecology and Evolution*, 32(7), 531–546. <http://doi.org/10.1016/j.tree.2017.03.015>
- Wood, S. N. (2006). *Generalized additive models: an introduction with R. Texts in Statistical Science* (1st ed.). Chapman and Hall/CRC. [http://doi.org/10.1111/j.1541-0420.2007.00905\\_3.x](http://doi.org/10.1111/j.1541-0420.2007.00905_3.x)
- Wood, S. N. (2011). Fast stable restricted maximum likelihood and marginal likelihood estimation of semiparametric generalized linear models. *Journal of the Royal Statistical Society. Series B: Statistical Methodology*, 73(1), 3–36. <http://doi.org/10.1111/j.1467-9868.2010.00749.x>
- Wright, I. J., Reich, P. B., Westoby, M., Ackerly, D. D., Baruch, Z., Bongers, F., ... Villar, R. (2004). The worldwide leaf economics spectrum. *Nature*, 428(6985), 821–827. <http://doi.org/10.1038/nature02403>
- Wright, J. P., & Sutton-Grier, A. (2012). Does the leaf economic spectrum hold within local species pools across varying environmental conditions? *Functional Ecology*, 26(6), 1390–1398. <http://doi.org/10.1111/1365-2435.12001>
- Zhu, Y., Siegwolf, R. T. W., Durka, W., & Körner, C. (2010). Phylogenetically balanced evidence for structural and carbon isotope responses in plants along elevational gradients. *Oecologia*, 162(4), 853–863. <http://doi.org/10.1007/s00442-009-1515-6>

## Supplement

Supplementary Table 1: Filters applied to Arabidopsis accessions, and final numbers considered for each phenotype.

|             |                                                                    |
|-------------|--------------------------------------------------------------------|
| 3838        | Total instances of Arabidopsis with collection date                |
| 444         | Removed due to collection date in midwinter (suspected unreliable) |
| 11          | Outside native range                                               |
| 72          | Unable to visually check record                                    |
| 40          | Only fruits present or senesced plants                             |
| 96          | Only flowers present                                               |
| 10          | Neither flowers nor fruits present                                 |
| 2           | Included non-vegetative tissue in chemical analysis                |
| 2           | Misidentified <i>Arabis alpina</i>                                 |
| <b>3159</b> | Confident occurrences of Arabidopsis flowering time                |

Of these:

|            |                                                                   |
|------------|-------------------------------------------------------------------|
| 468        | Sent to Stable Isotope Facility                                   |
| 453        | $\delta^{15}\text{N}$ , $\Delta^{13}\text{C}$ , C:N, Proportion N |
| 1          | $\delta^{15}\text{N}$ , $\Delta^{13}\text{C}$                     |
| 2          | $\delta^{15}\text{N}$ , C:N, Proportion N                         |
| <b>456</b> | Samples with chemical phenotypes                                  |

Covariates removed from the final models:

The N deposition estimates we tested (Dentener, 2006) were spatially coarse and slightly correlated with year ( $r^2 = 0.2$ ). Elevation was not obviously correlated with year ( $r^2 = 0.004$ ), but the smooth term for elevation had an estimated concavity greater than 0.9 in both the temporal and spatial models, which indicates that it could be approximated from the smooth terms of our other variables. When elevation and nitrogen deposition were included in the model as covariates, the Hessian matrices were not positive definite, and thus could not be used to obtain confidence intervals. To look at elevation, we tested temporal and spatial models that include elevation but not year.

Elevation tended to have a negative relationship with  $\Delta^{13}\text{C}$  as expected due to declining  $C_a$  at high elevation (Körner, Farquhar, & Roksandic, 1988) (Figures S13 and S14). This was significant in the temporal model across much of Asia.

## Additional plots of model surfaces Phenology

A. Mean April Temperature

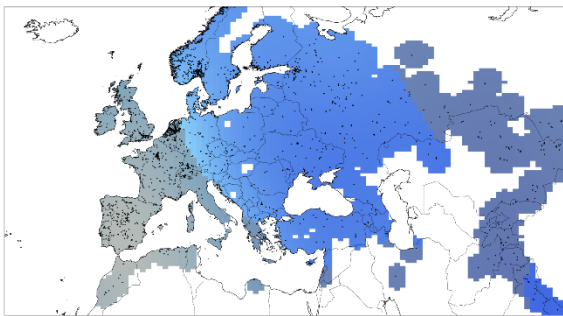

B. Minimum January Temperature

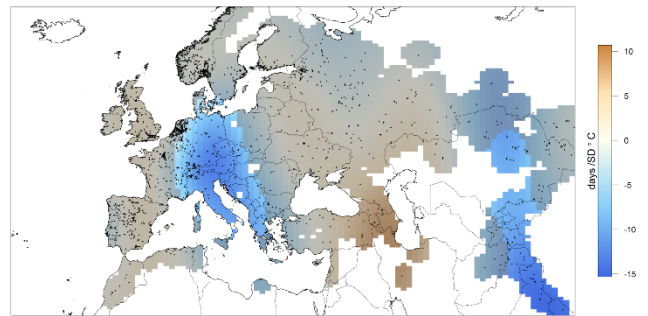

C. July Aridity Index

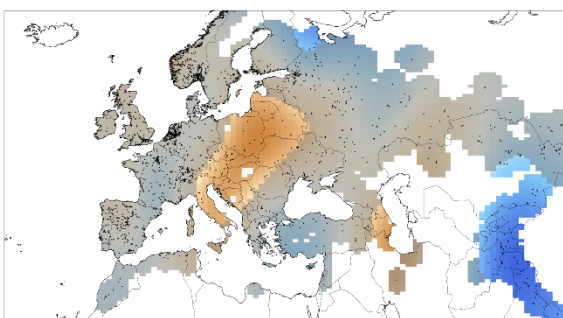

D. Year

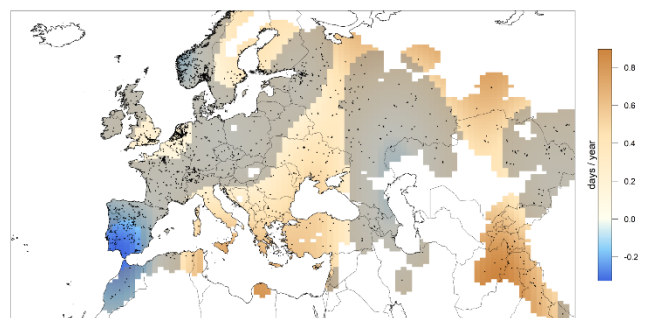

Figure S1: Temporal model phenology for April mean temperature (A), January minimum temperature (B), July aridity index (C), and year (D).

A. Mean April Temperature

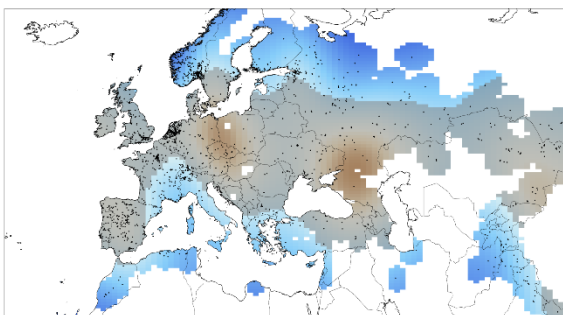

B. Minimum January Temperature

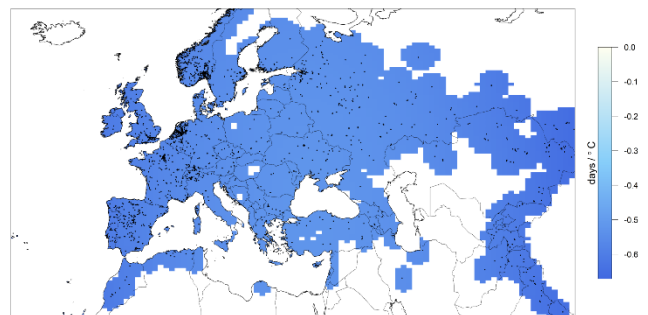

C. July Aridity Index

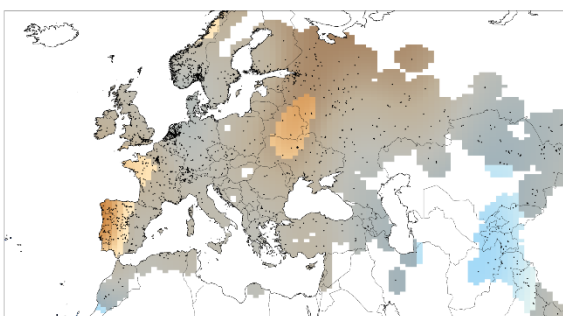

D. Year

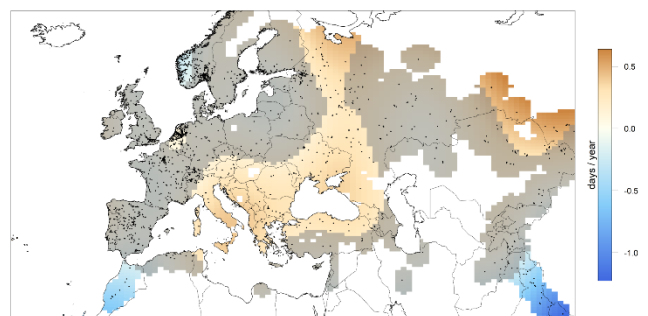

Figure S2: Spatial model phenology for April mean temperature (A), January minimum temperature (B), July aridity index (C), and year (D).

A. Mean April Temperature

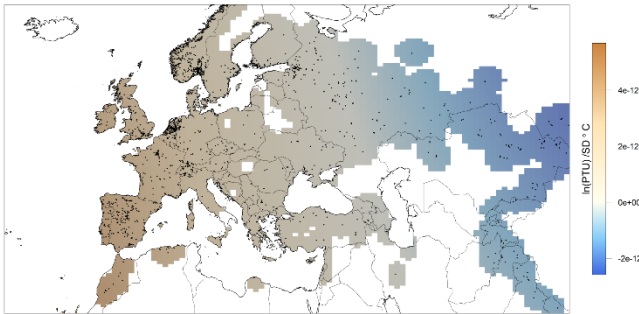

B. Minimum January Temperature

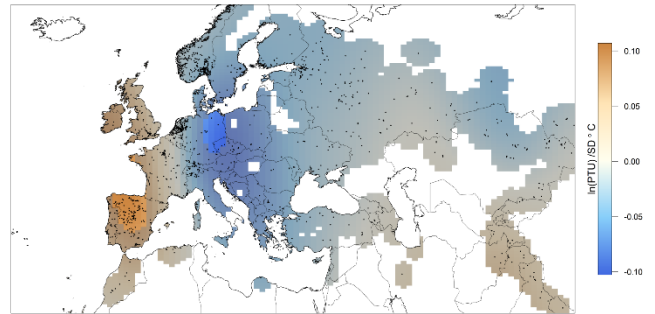

C. July Aridity Index

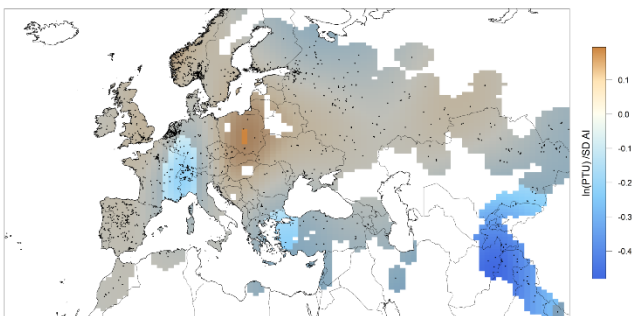

D. Year

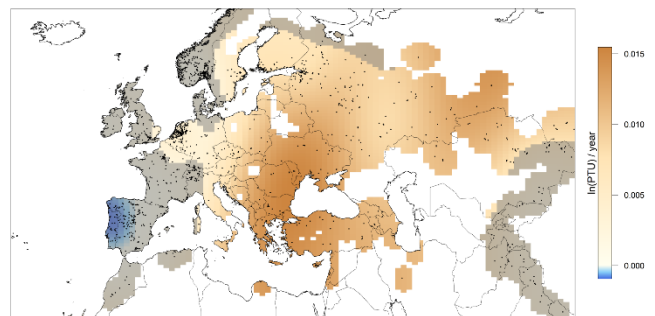

Figure S3: Temporal model photothermal units for April mean temperature (A), January minimum temperature (B), July aridity index (C), and year (D).

### Photothermal Units

A. Mean April Temperature

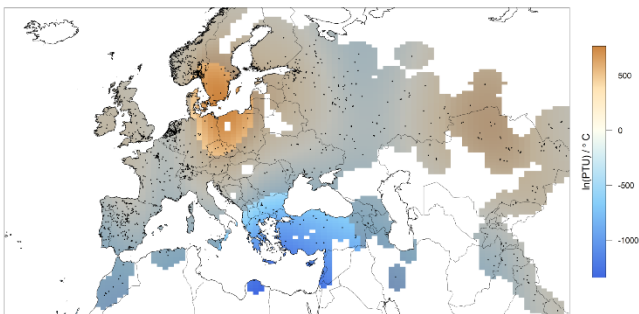

B. Minimum January Temperature

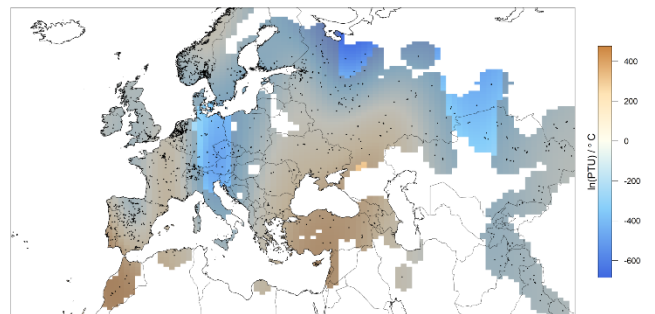

C. July Aridity Index

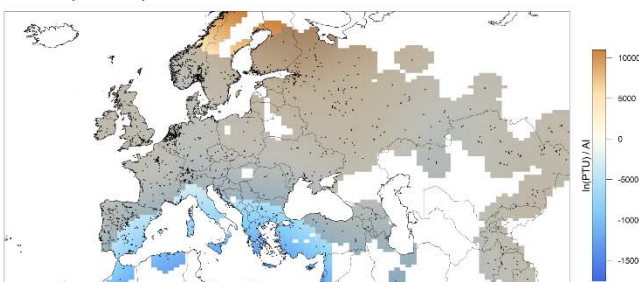

D. Year

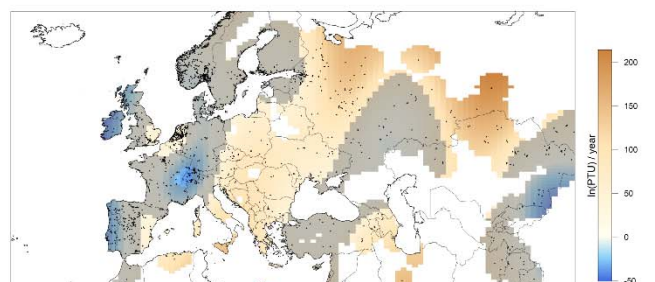

Figure S4: Spatial model photothermal units for April mean temperature (A), January minimum temperature (B), July aridity index (C), and year (D).



A. Mean April Temperature

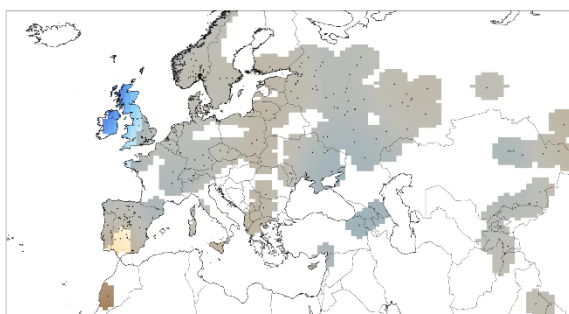

B. Minimum January Temperature

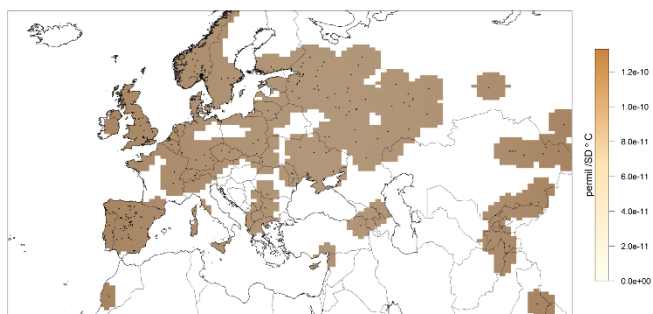

C. July Aridity Index

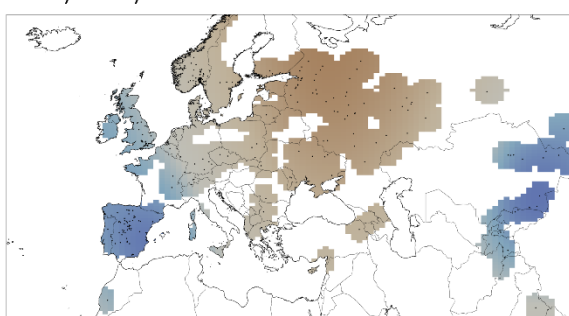

D. Year

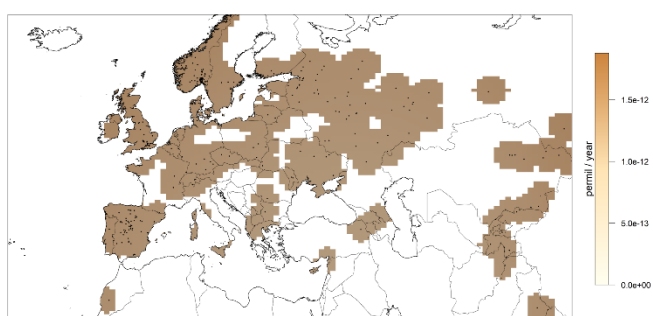

Figure S5: Temporal model  $\Delta^{13}C$  for April mean temperature (A), January minimum temperature (B), July aridity index (C), and year (D).

A. Mean April Temperature

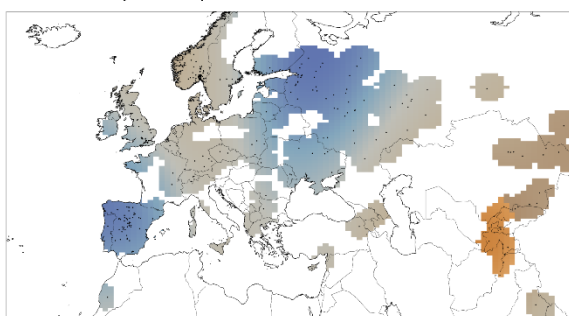

B. Minimum January Temperature

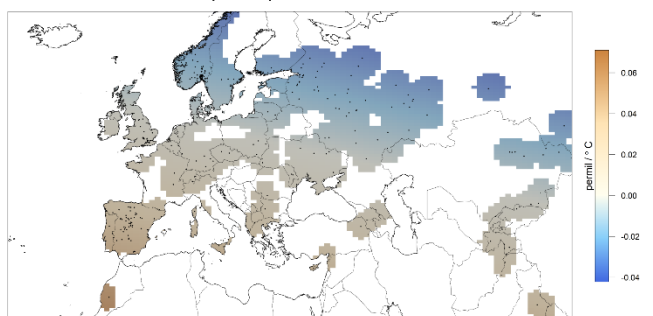

C. July Aridity Index

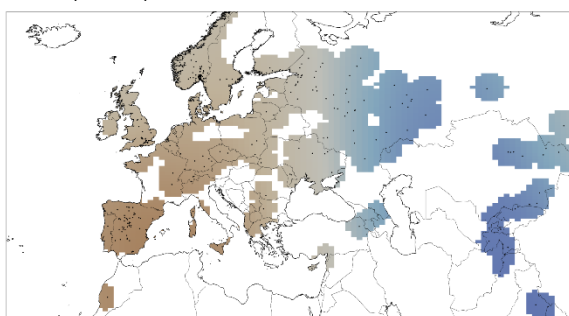

D. Year

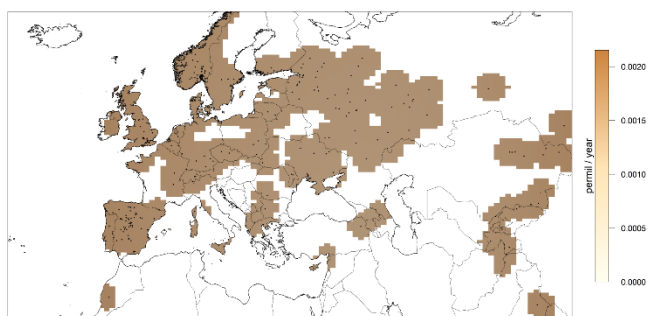

Figure S6: Spatial model  $\Delta^{13}C$  for April mean temperature (A), January minimum temperature (B), July aridity index (C), and year (D).

$\Delta^{13}C$

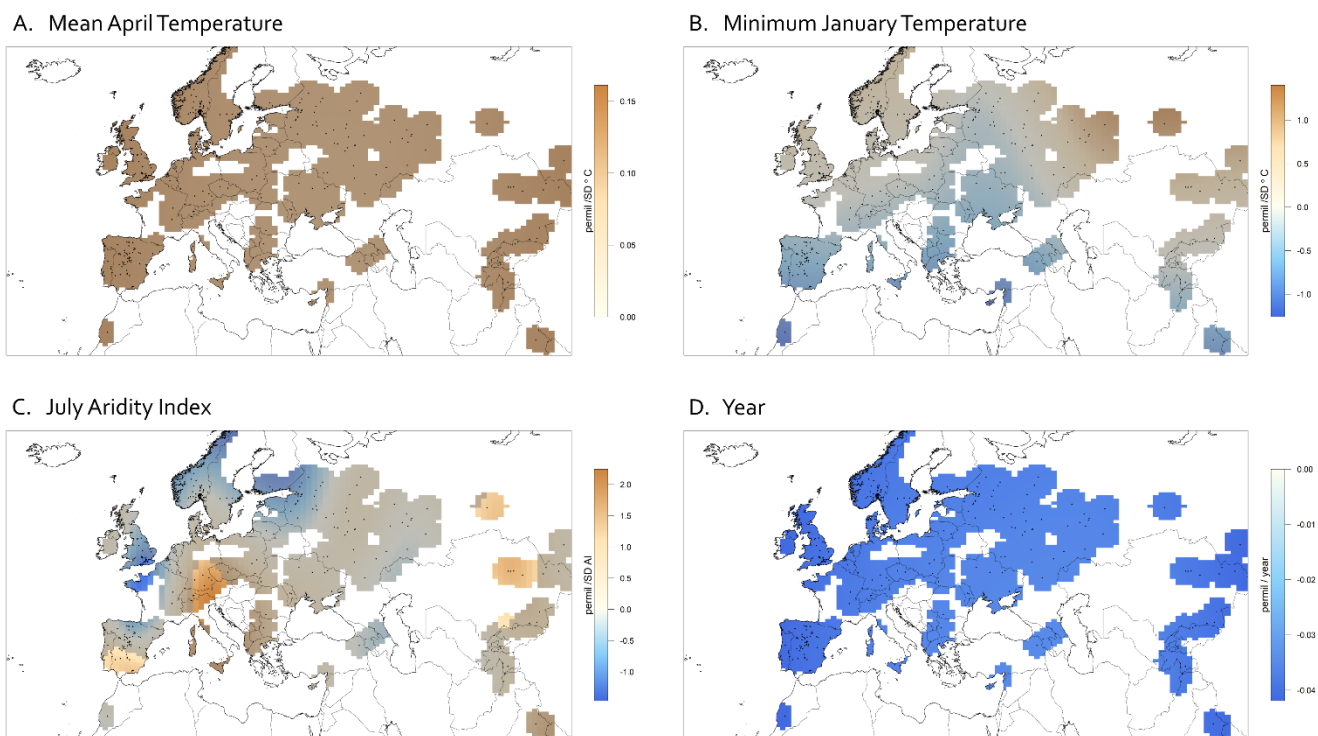

Figure S7: Temporal model for  $\delta^{15}\text{N}$  April mean temperature (A), January minimum temperature (B), July aridity index (C), and year (D).

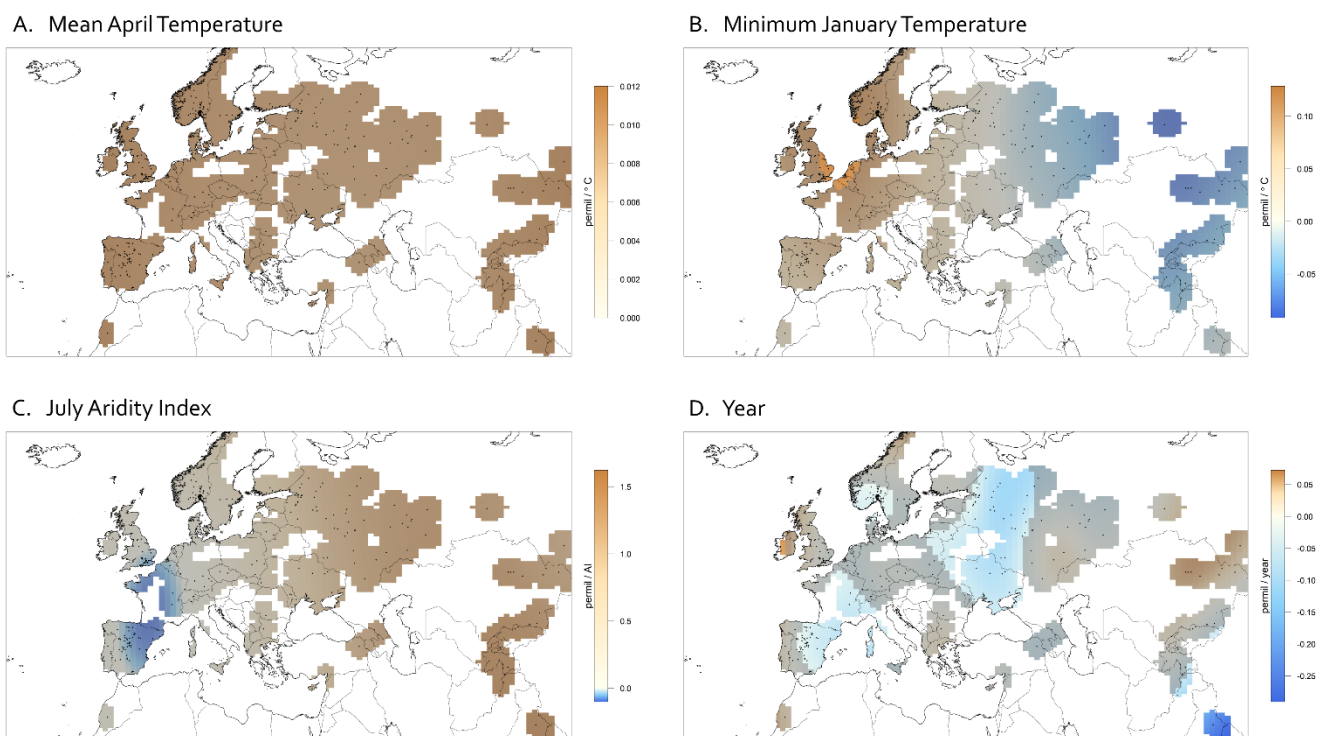

Figure S8: Spatial model  $\delta^{15}\text{N}$  for April mean temperature (A), January minimum temperature (B), July aridity index (C), and year (D).

$\delta^{15}\text{N}$



A. Mean April Temperature

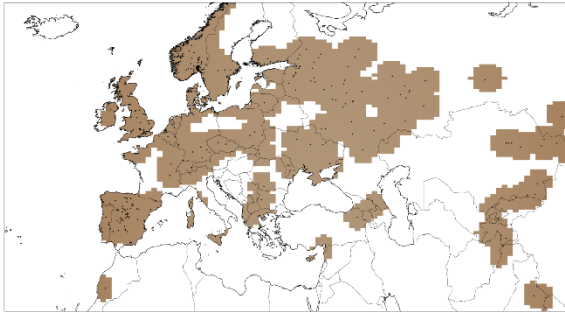

B. Minimum January Temperature

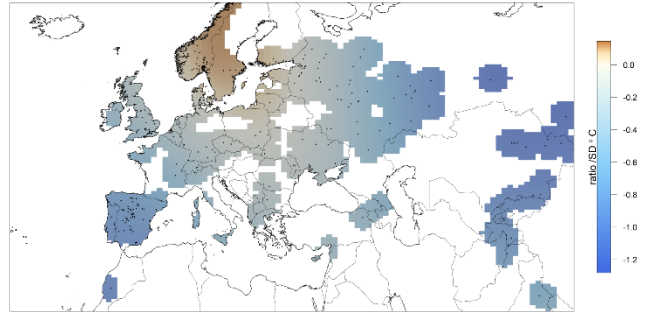

C. July Aridity Index

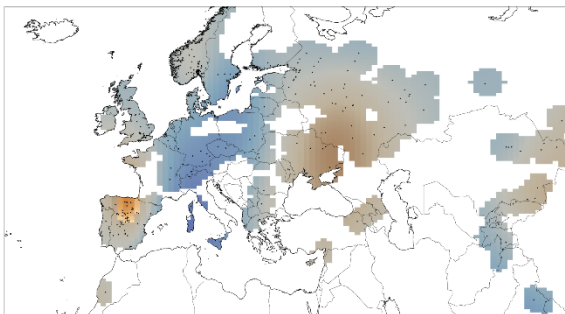

D. Year

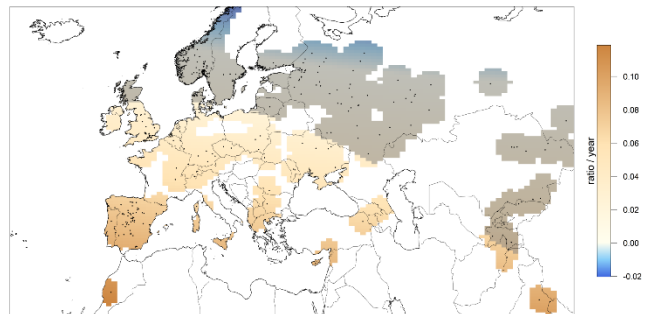

Figure S9: Temporal model for C:N April mean temperature (A), January minimum temperature (B), July aridity index (C), and year (D).

C:N

*Proportion N.* Note: the Hessian Matrix was not positive definite for these matrices, so the confidence intervals are unreliable.

A. Mean April Temperature

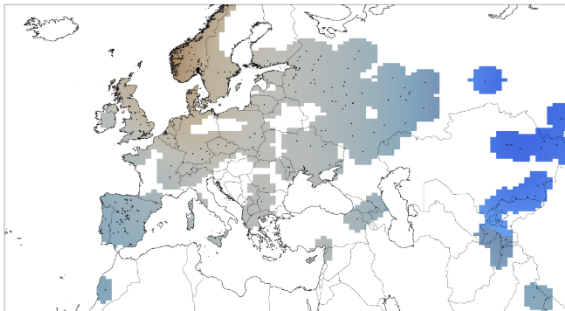

B. Minimum January Temperature

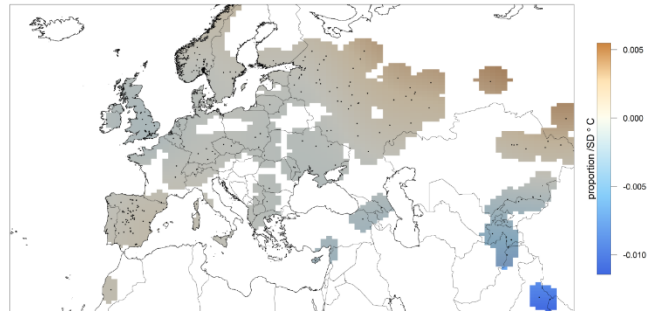

C. July Aridity Index

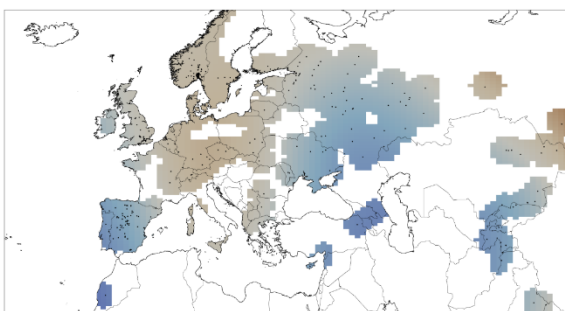

D. Year

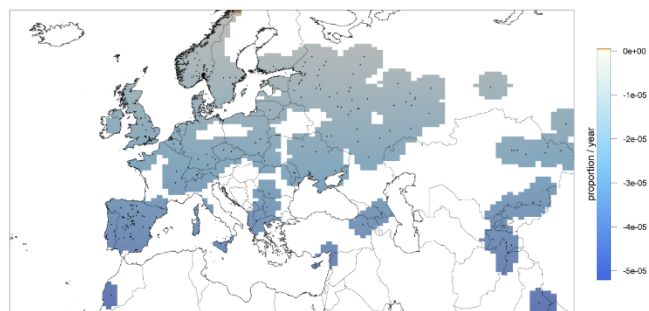

Figure S11: Temporal model proportion N for April mean temperature (A), January minimum temperature (B), July aridity index

Figure S12: Spatial model proportion  $N$  for April mean temperature (A), January minimum temperature (B), July aridity index (C), and year (D).

$\Delta^{13}\text{C}$  using elevation in place of year

A. Mean April Temperature

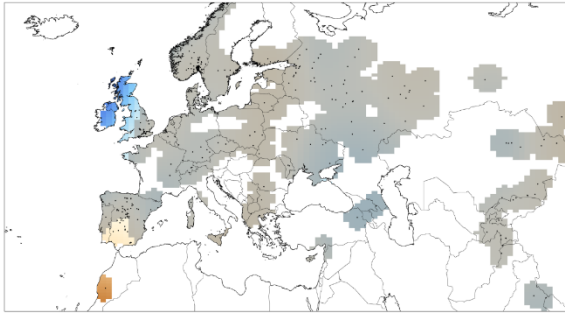

B. Minimum January Temperature

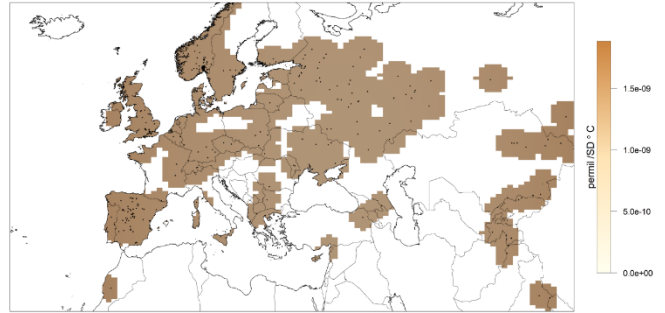

C. July Aridity Index

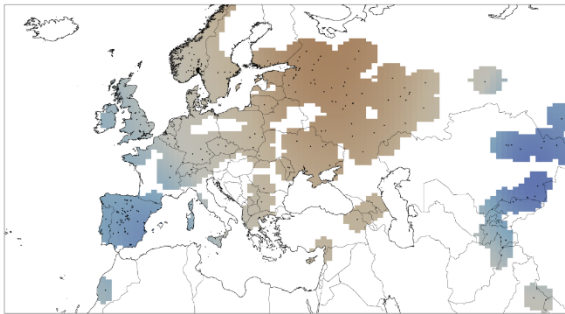

D. Elevation

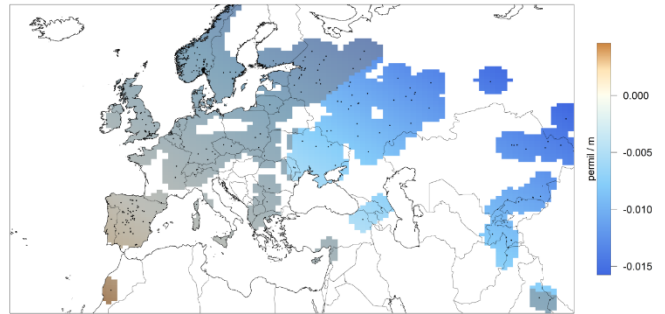

Figure S13: Temporal model  $\Delta^{13}\text{C}$  for April mean temperature (A), January minimum temperature (B), July aridity index (C), and elevation (D).

A. Mean April Temperature

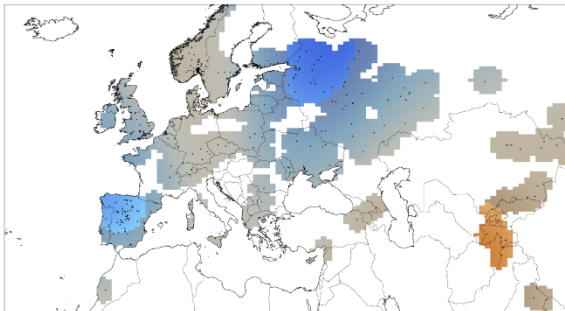

B. Minimum January Temperature

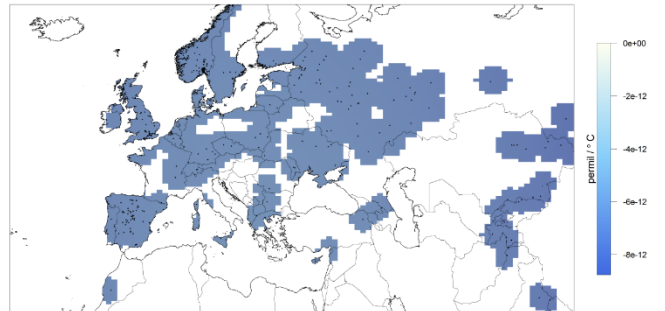

C. July Aridity Index

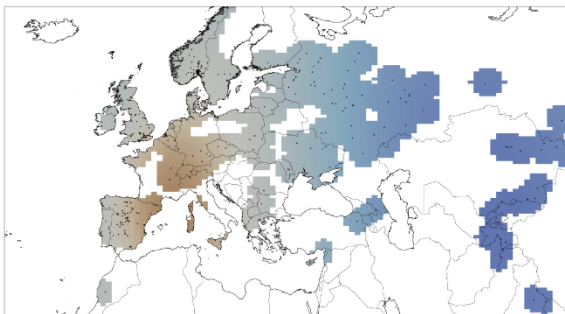

D. Elevation

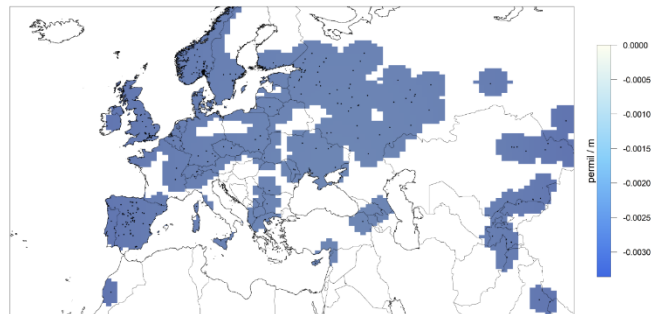

Figure S34: Spatial model  $\Delta^{13}\text{C}$  for April mean temperature (A), January minimum temperature (B), July aridity index (C), and elevation (D).

$\Delta^{13}\text{C}$  using only samples collected before 1950. Rising atmospheric  $\text{CO}_2$  concentrations may mask climate associations (Drake et al., 2017). However,  $\Delta^{13}\text{C}$  before 1950 is still not significantly related to climate for the temporal model or the year only model, and the spatial model indicates a negative association between  $\Delta^{13}\text{C}$  and aridity in the eastern part of the native range.

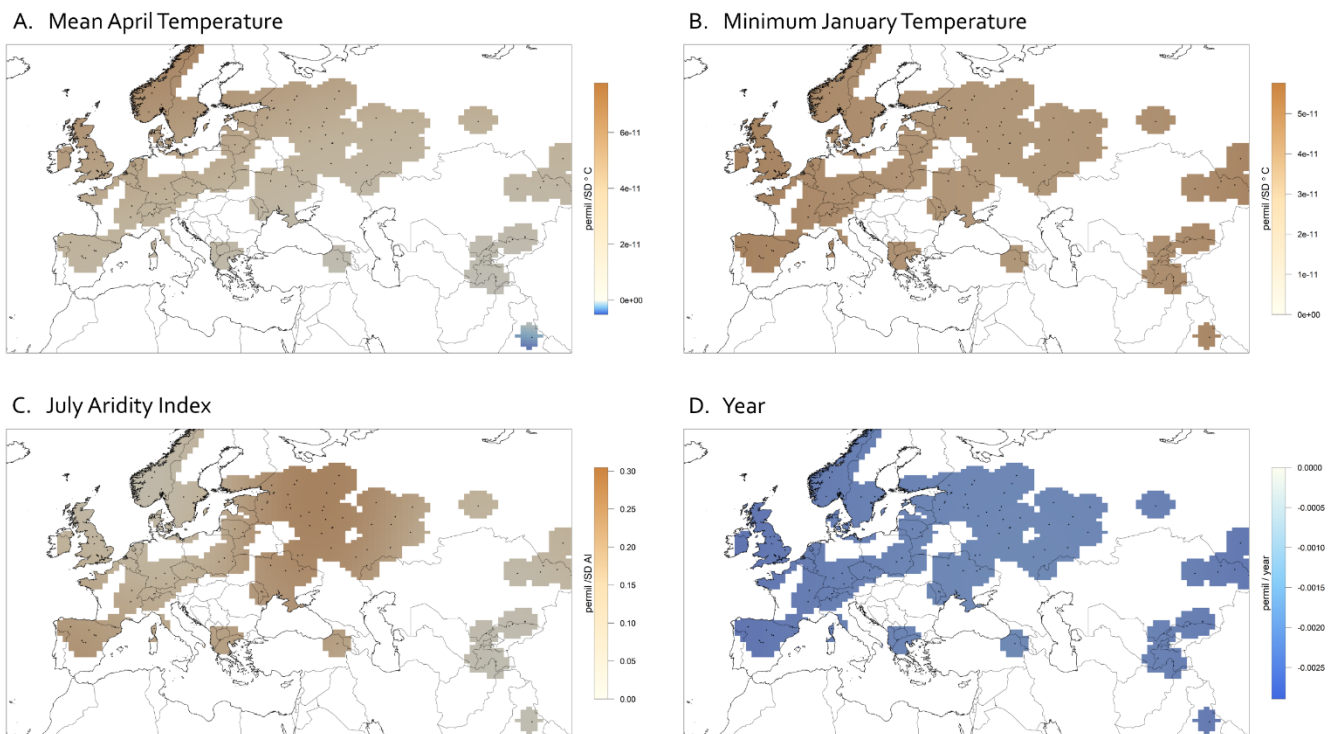

Figure S15: Temporal model  $\Delta^{13}\text{C}$  for April mean temperature (A), January minimum temperature (B), July aridity index (C), and year (D) for samples collected prior to 1950.

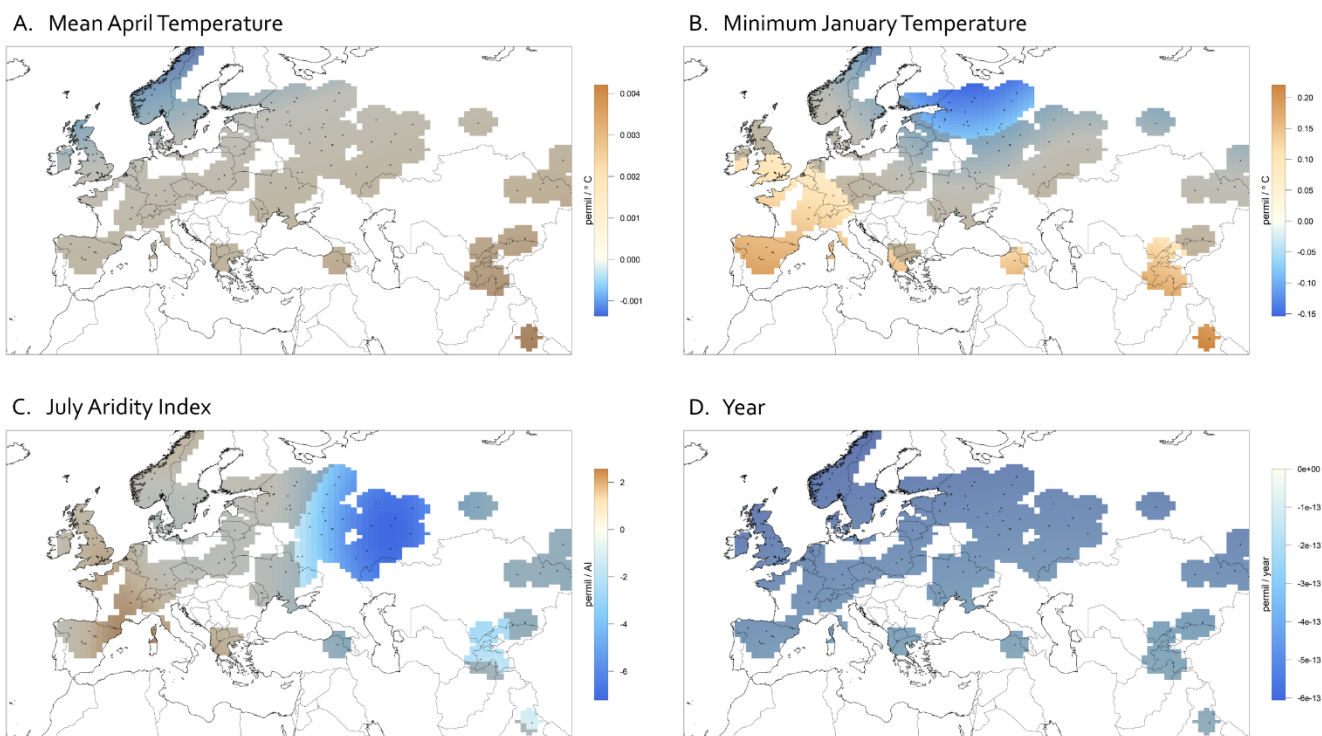

Figure S16: Spatial model  $\Delta^{13}\text{C}$  for April mean temperature (A), January minimum temperature (B), July aridity index (C), and year (D for samples collected prior to 1950).

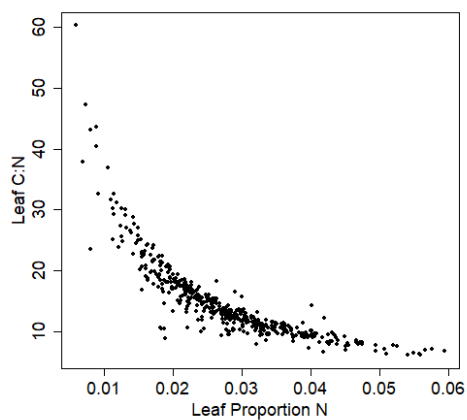

Figure S17: Proportion leaf nitrogen and leaf C:N ratio of the accessions sampled in our study show a negative association.

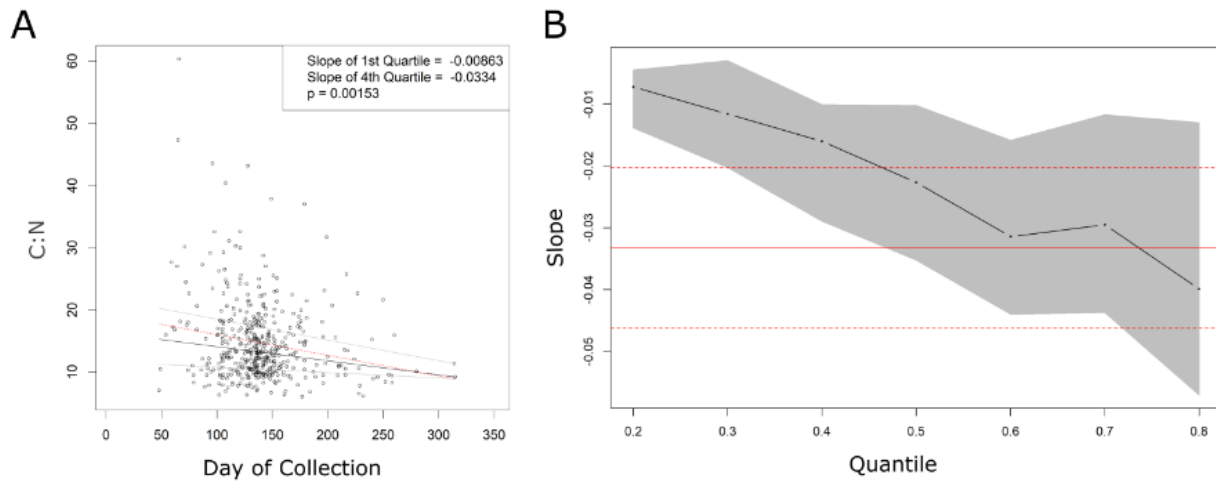

Figure S18: Quantile regression for C:N predicted by day of collection. No late collected accessions have a high C:N ratio. A) Gray lines indicate the regression of the 1<sup>st</sup> and 4<sup>th</sup> quartiles, while the black line indicates the regression of all data. The red line indicates the ordinary least squares line. B) Slopes between the 20<sup>th</sup> and 40<sup>th</sup> percentile are significantly different from the slope of the regression of all data. The red solid line shows the least squares estimate, while the dotted lines show the 95% confidence intervals. Black dots represent the slope for each quantile.

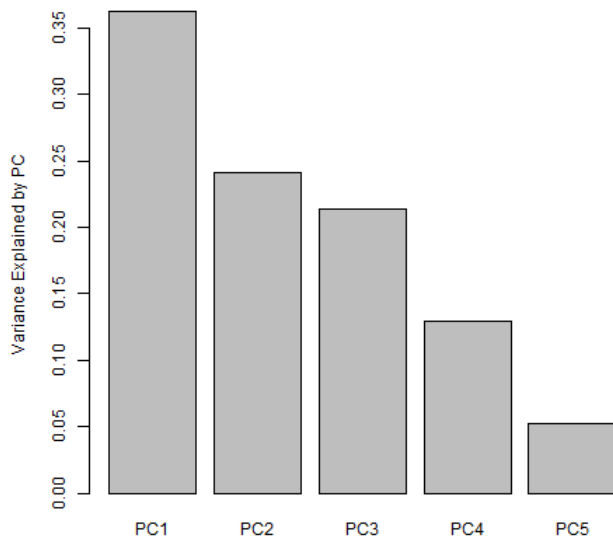

Figure S19: Proportion of variance explained by Principal Components analysis of phenotypes



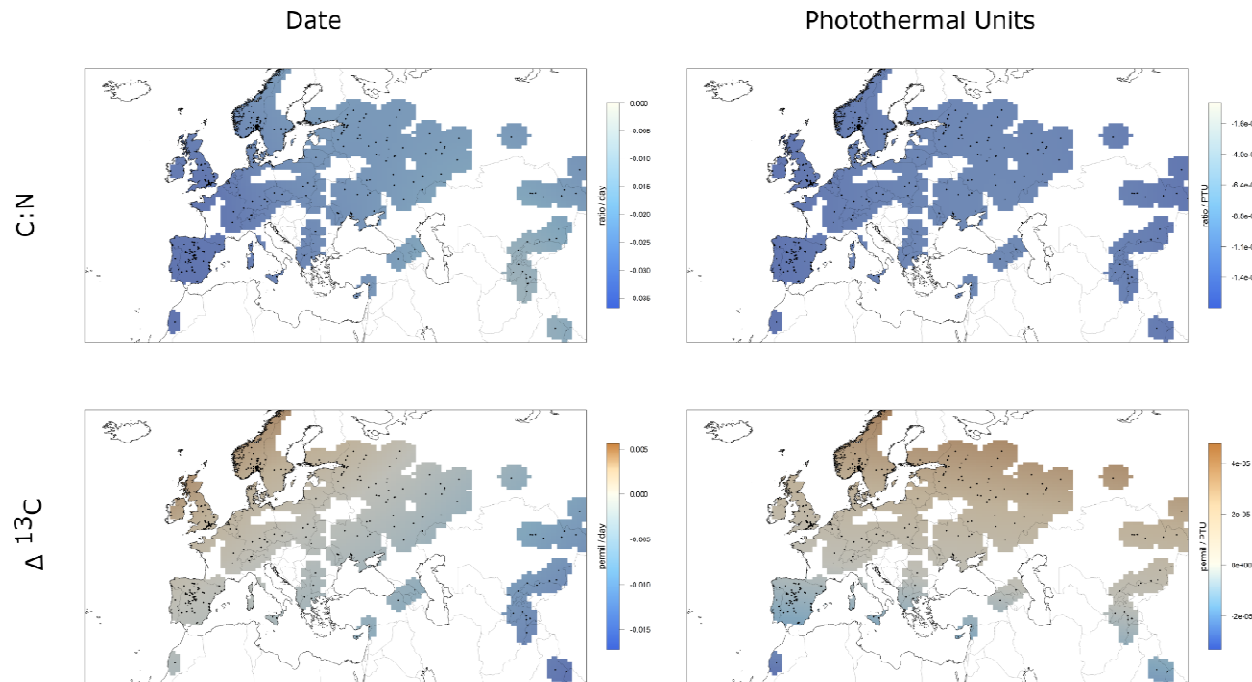

Figure S20: Covariance of phenotypes. Across space, the relationship between C:N and date or PTU at collection is not significantly negative across the range.  $\Delta^{13}\text{C}$  may be positively related to days or PTU at collection in some regions and negatively related to days or PTU at collection in other regions, but the relationship does not differ significantly from 0 at the 95% confidence interval.

Figure S21:

Herbarium samples assigned to the nearest geographic genetic cluster from the 1001 genomes project did not show strong patterns of genetic or geographic determination of phenotypic values in the principal component space. Ellipses include 75% of group members. No herbarium samples were assigned to the South Sweden genetic cluster in this analysis.

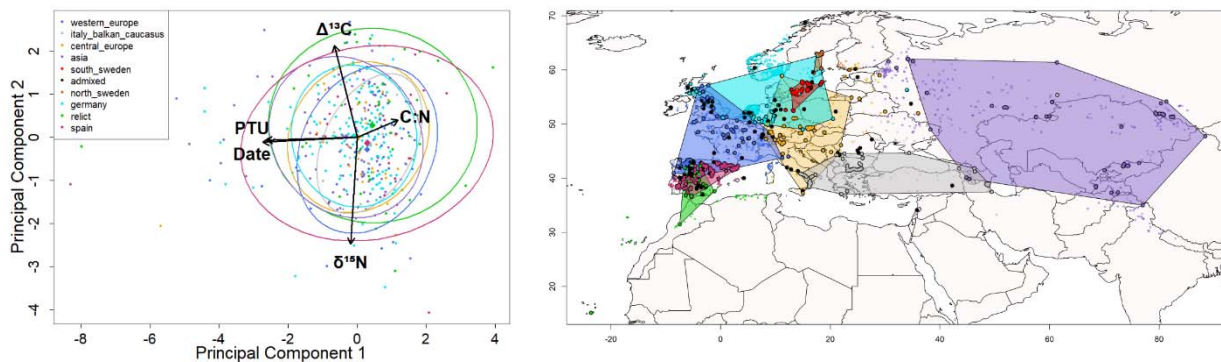

Source: https://www.biorxiv.org/content/10.1101/424242v2.full.pdf
